# Supplementary material for: Non-β-Lactam Allosteric Inhibitors Target Methicillin-Resistant Staphylococcus aureus: An In Silico Drug Discovery Study
Source: MDPI journal article supplement (doi:10.3390/antibiotics10080934), 2021-08-01
Supplement: s1 [file s1]

# Non- $\beta$ -Lactam Allosteric Inhibitors Target Methicillin-Resistant *Staphylococcus aureus*: An *In Silico* Drug Discovery Study

Mahmoud A. A. Ibrahim <sup>1,\*</sup>, Khlood A. A. Abdeljawaad <sup>1</sup>, Alaa H. M. Abdelrahman <sup>1</sup>, Othman R. Alzahrani <sup>2</sup>, Fahad M. Alshabrmi <sup>3</sup>, Esraa Khalaf <sup>4</sup>, Mahmoud F. Moustafa <sup>5,6</sup>, Faris Alrumaihi <sup>3</sup>, Khaled S. Allemailem <sup>3</sup>, Mahmoud E. S. Soliman <sup>7</sup>, Paul W. Paré <sup>8</sup>, Mohamed-Elamir F. Hegazy <sup>9,10,\*</sup> and Mohamed A. M. Atia <sup>11,\*</sup>

<sup>1</sup> Computational Chemistry Laboratory, Chemistry Department, Faculty of Science, Minia University, Minia 61519, Egypt; kh.abdeljawaad@compchem.net (K.A.A.A.); a.abdelrahman@compchem.net (A.H.M.A.)

<sup>2</sup> Department of Biology, Faculty of Sciences, University of Tabuk, Tabuk 71491, Saudi Arabia; O-alzahrani@ut.edu.sa (O.R.A.)

<sup>3</sup> Department of Medical Laboratories, College of Applied Medical Sciences, Qassim University, Buraydah 51452, Saudi Arabia; fshbrmy@qu.edu.sa (F.M.A.); f\_alrumaihi@qu.edu.sa (F.A.); k.allemailem@qu.edu.sa (K.S.A.)

<sup>4</sup> Department of Bacteriology, Mycology and Immunology, Faculty of Veterinary Medicine, Beni-Suef University, Beni-Suef 62511, Egypt; dresraa.fathy@yahoo.com (E.K.)

<sup>5</sup> Department of Biology, College of Science, King Khalid University, Abha 9004, Saudi Arabia; hamdony@yahoo.com or mfmotfa@kku.edu.sa (M.F.M.)

<sup>6</sup> Department of Botany & Microbiology, Faculty of Science, South Valley University, Qena 83523, Egypt

<sup>7</sup> Molecular Bio-computation and Drug Design Lab, School of Health Sciences, University of KwaZulu-Natal, Westville, Durban 4000, South Africa; soliman@ukzn.ac.za (M.E.S.S.)

<sup>8</sup> Department of Chemistry and Biochemistry, Texas Tech University, Lubbock, TX 79409, USA; paul.pare@ttu.edu (P.W.P.)

<sup>9</sup> Chemistry of Medicinal Plants Department, National Research Centre, Giza 12622, Egypt (M.E.F.H.)

<sup>10</sup> Department of Pharmaceutical Biology, Institute of Pharmaceutical and Biomedical Sciences, Johannes Gutenberg University, Mainz 55128, Germany

<sup>11</sup> Molecular Genetics and Genome Mapping Laboratory, Genome Mapping Department, Agricultural Genetic Engineering Research Institute (AGERI), Agricultural Research Center (ARC), Giza 12619, Egypt (M.A.M.A.)

\* Correspondence: m.ibrahim@compchem.net (M.A.A.I.); mohegazy@uni-mainz.de (M.E.F.H.); matia@ageri.sci.eg (M.A.M.A.); Tel.: +2010-241-61-444 (M.A.A.I.); +2-033-371-635 (M.E.F.H.); +2-010-001-64-922 (M.A.M.A.)

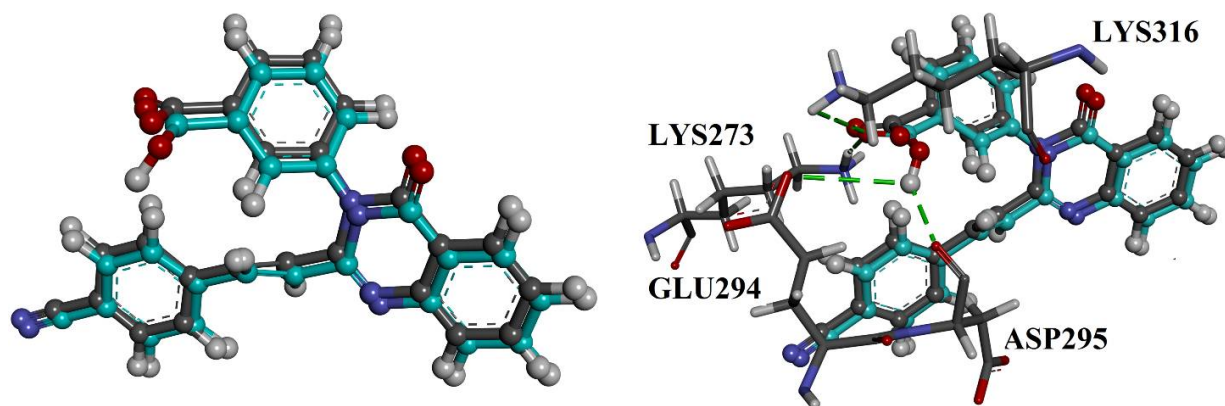

**Figure S1.** 3D representations of the predicted binding modes of ionized (in gray) and unionized (in cyan) QNZ complexed with the PBP2a inside the allosteric site.

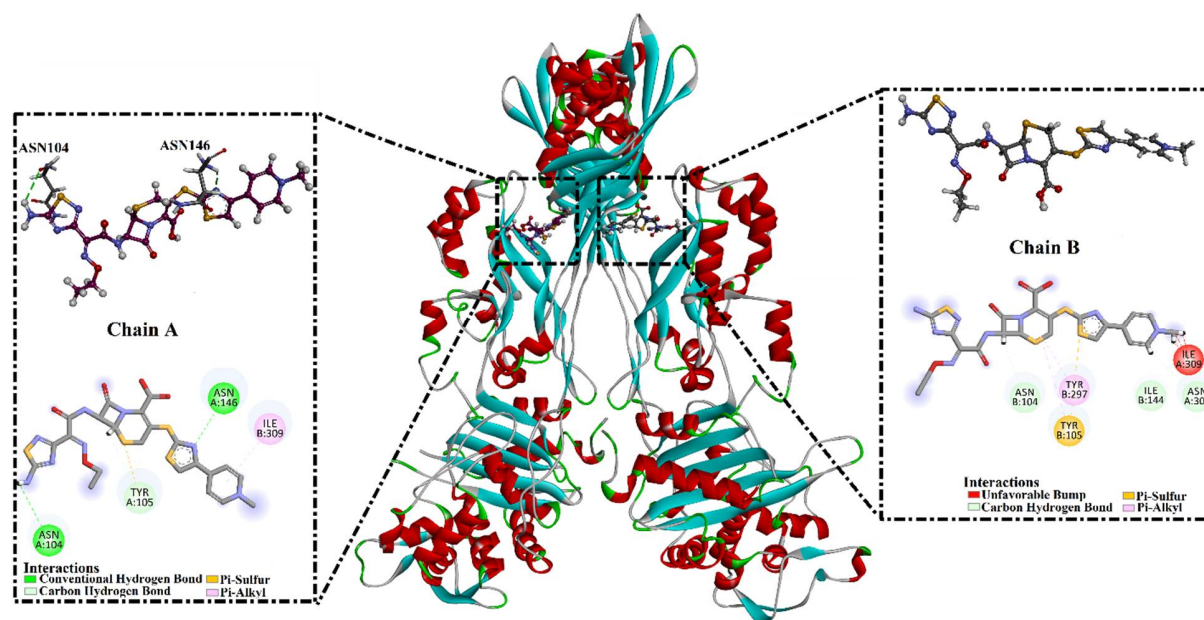

**Figure S2.** 3D and 2D representations of the experimental binding modes of CFT complexed with the PBP2a inside the allosteric site of chains A and B (PDB code: 3ZG0).

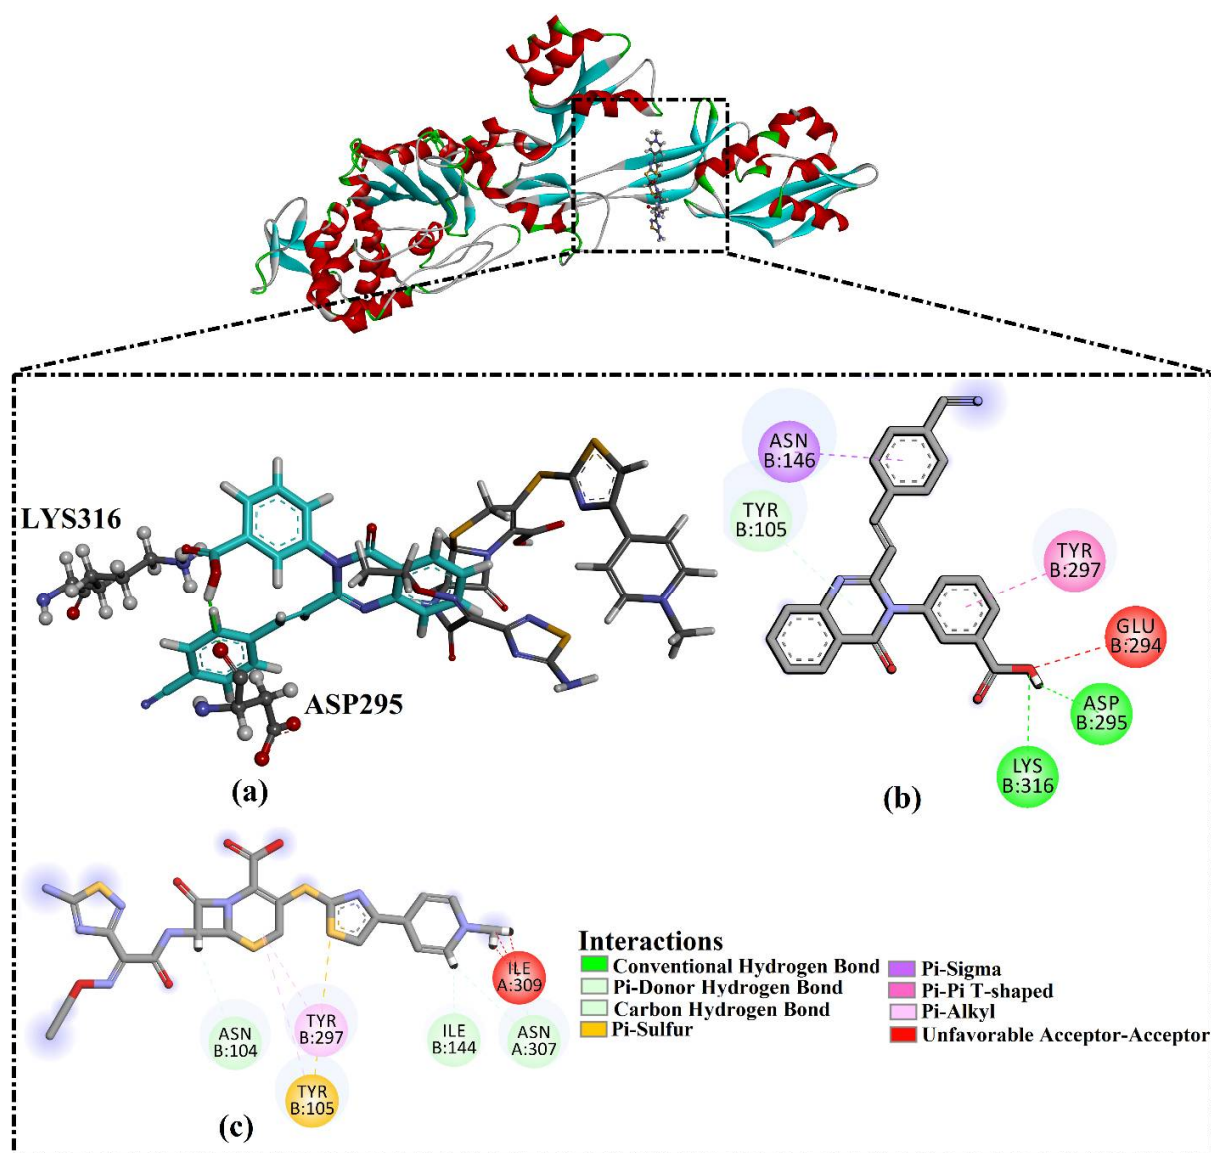

**Figure S3:** (a) 3D representations of the docked structures of QNZ (in cyan) and CFT (in gray) and 2D representations of the predicted binding modes of (b) QNZ and (c) CFT complexed with the PBP2a inside the allosteric site in acidic medium.

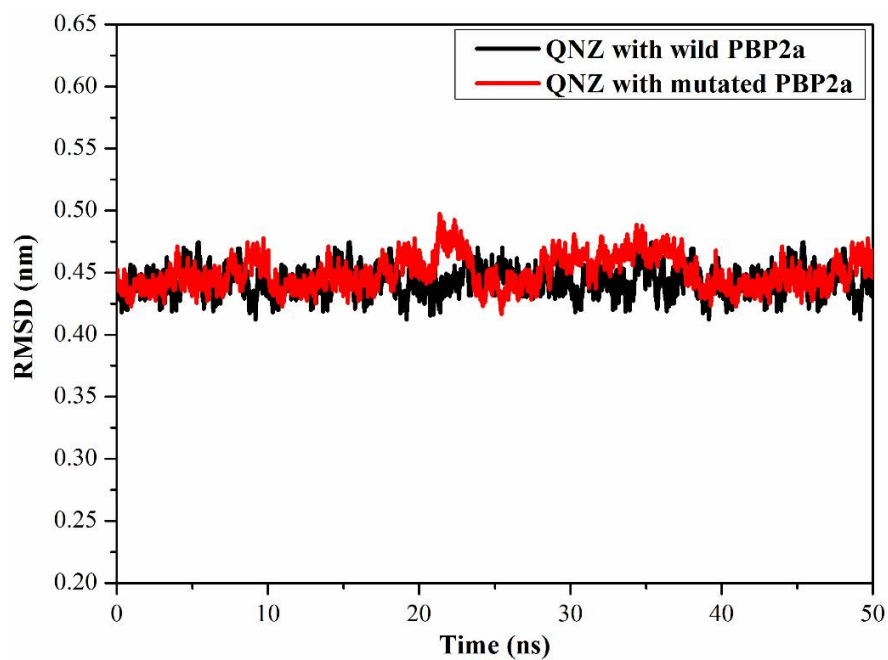

**Figure S4.** Root-mean-square deviation (RMSD) of the backbone atoms from the initial structure of QNZ with wild (in black), and double mutated PBP2a allosteric site (in red) in acidic medium throughout the 50 ns MD simulations.

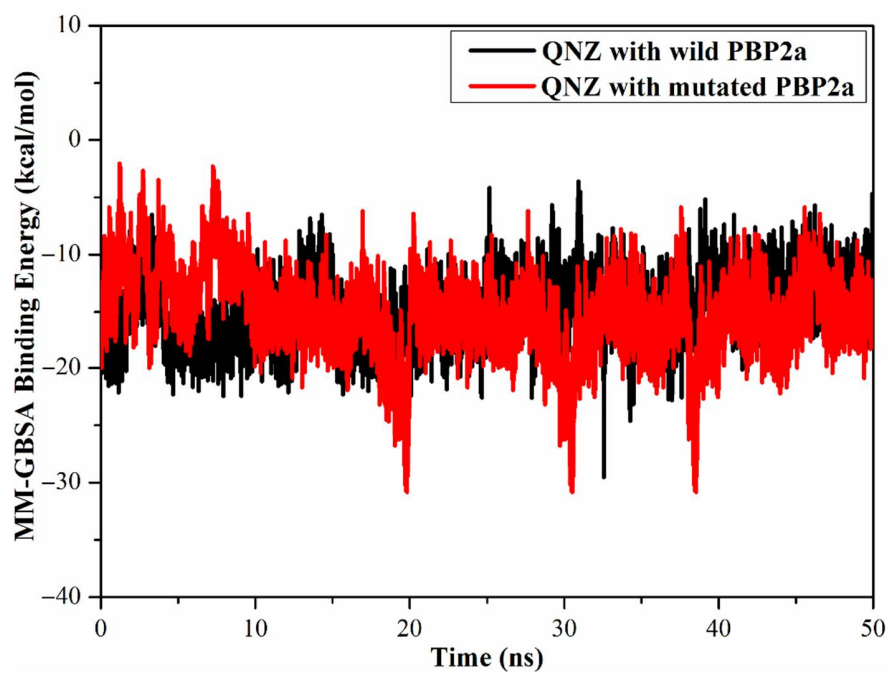

**Figure S5.** Estimated MM-GBSA binding energy per frame for QNZ with wild (in black) and mutated PBP2a allosteric site (in red) in acidic medium throughout the 50 ns MD simulations.

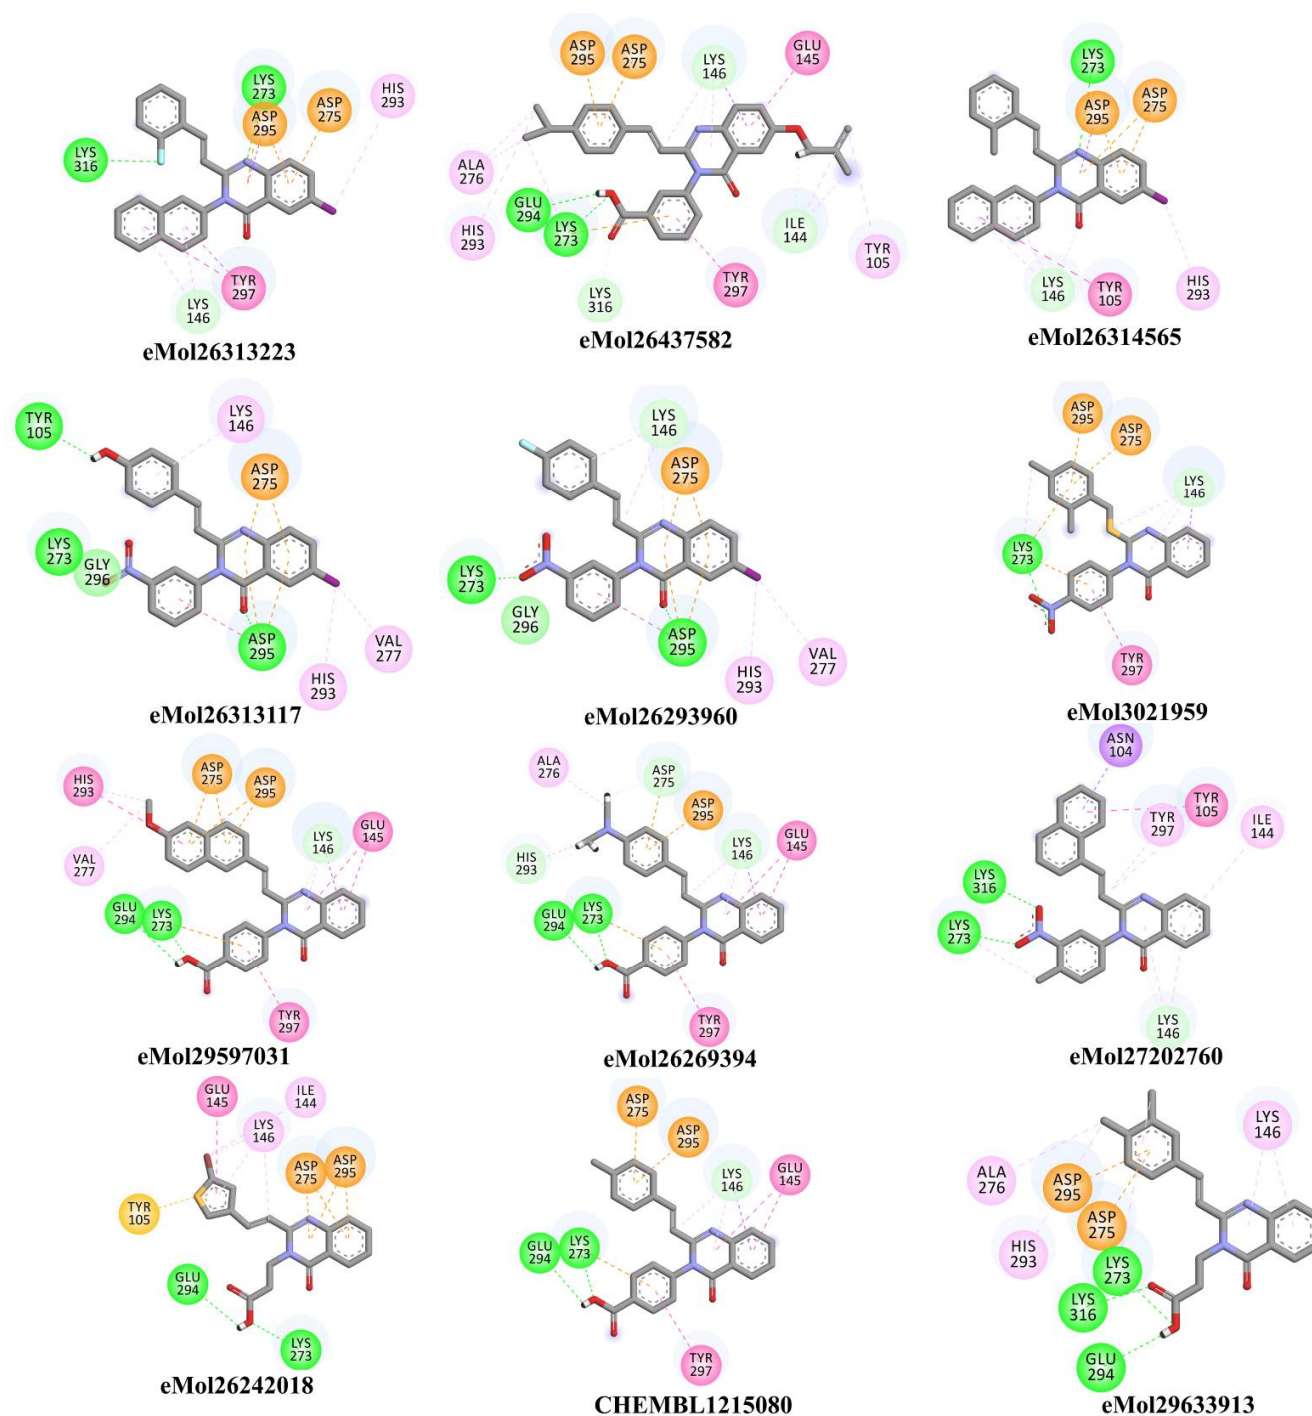

**Figure S6.** 2D representations of the predicted docked binding modes of the top 35 potent inhibitors in complex with mutated PBP2a allosteric site in acidic medium.



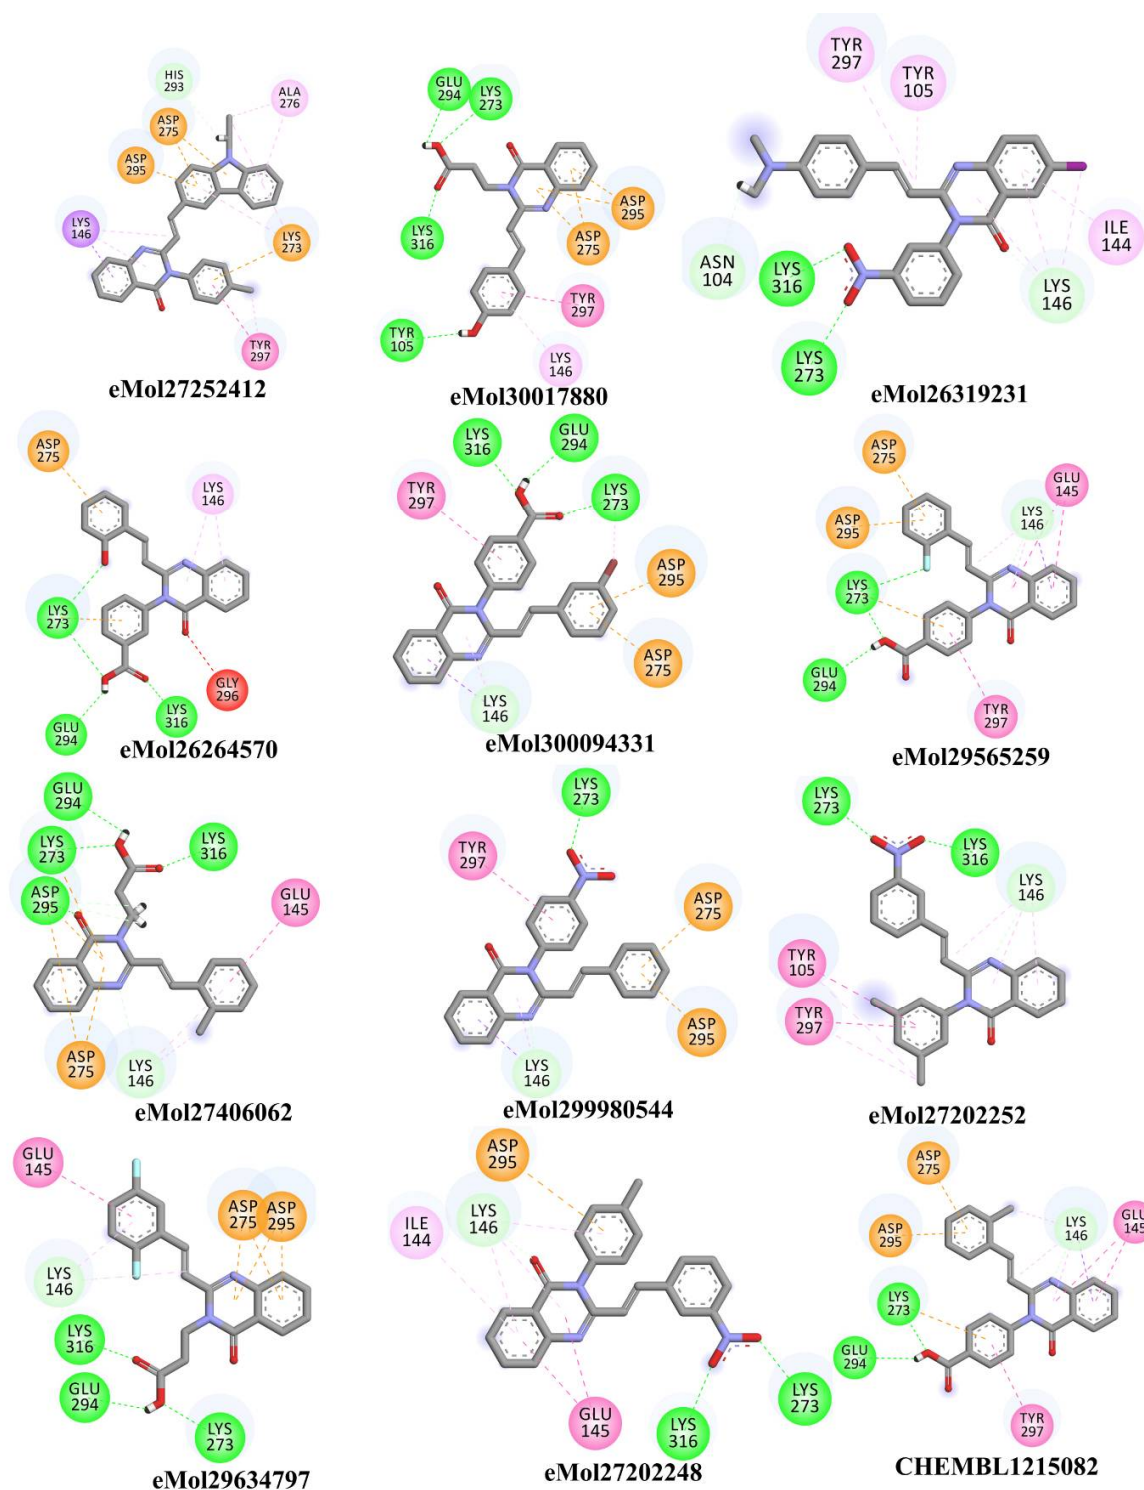

Figure S6. Continued.



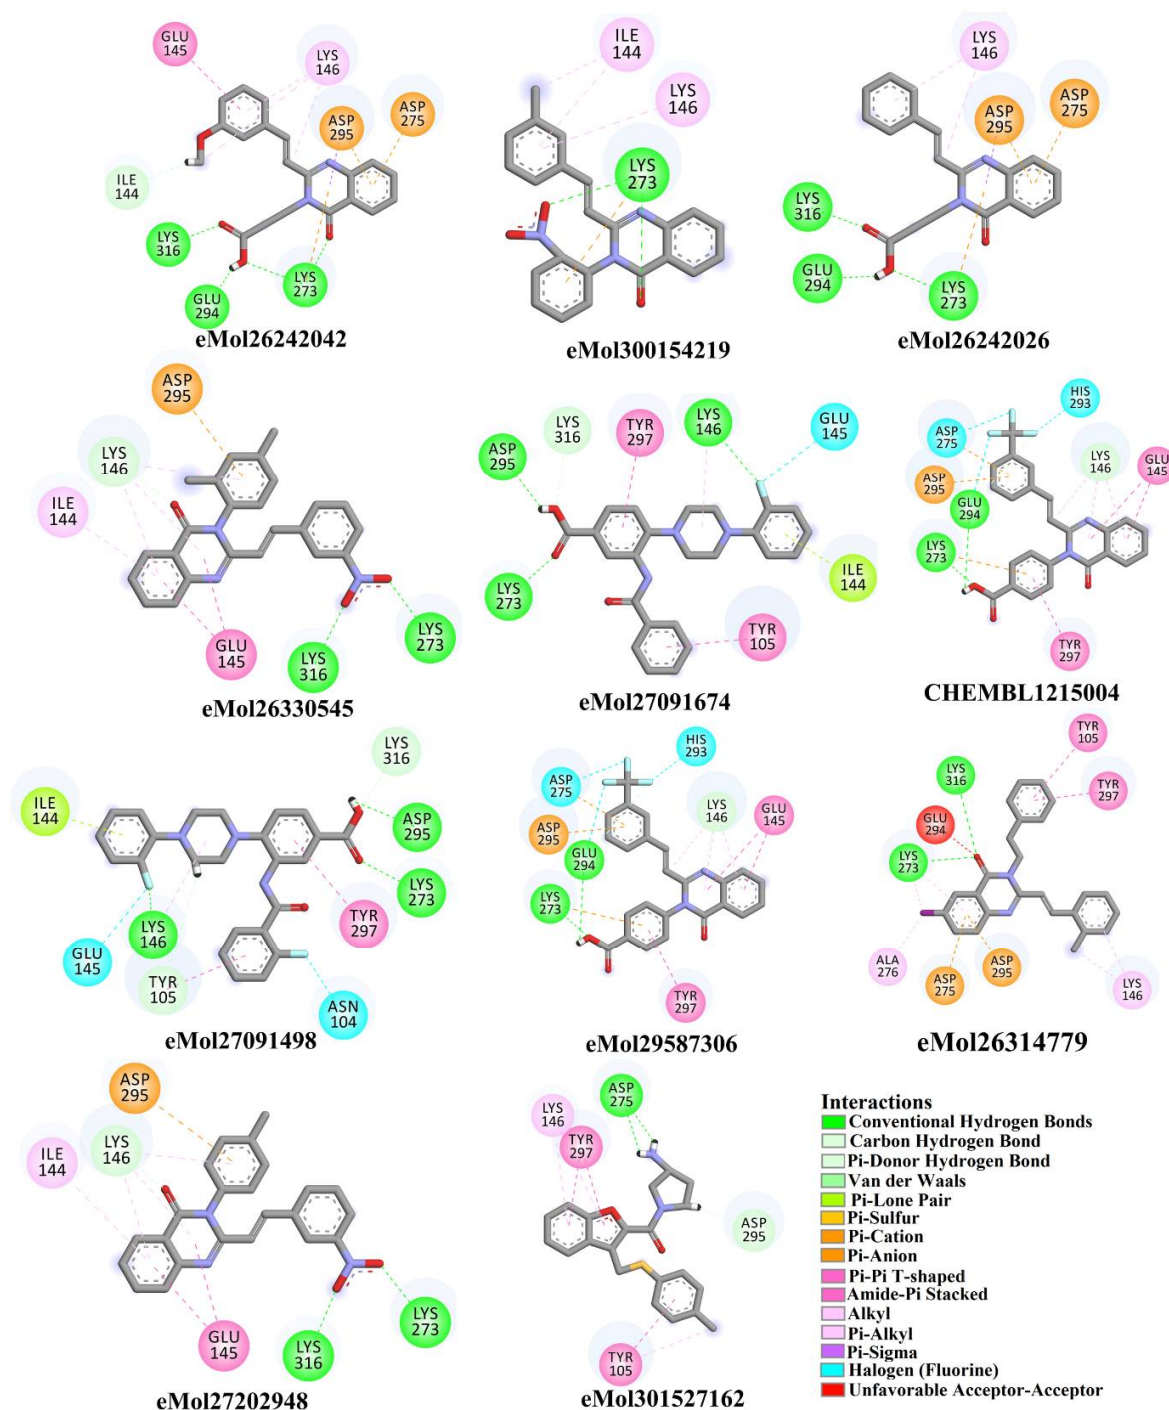

Figure S6. Continued.

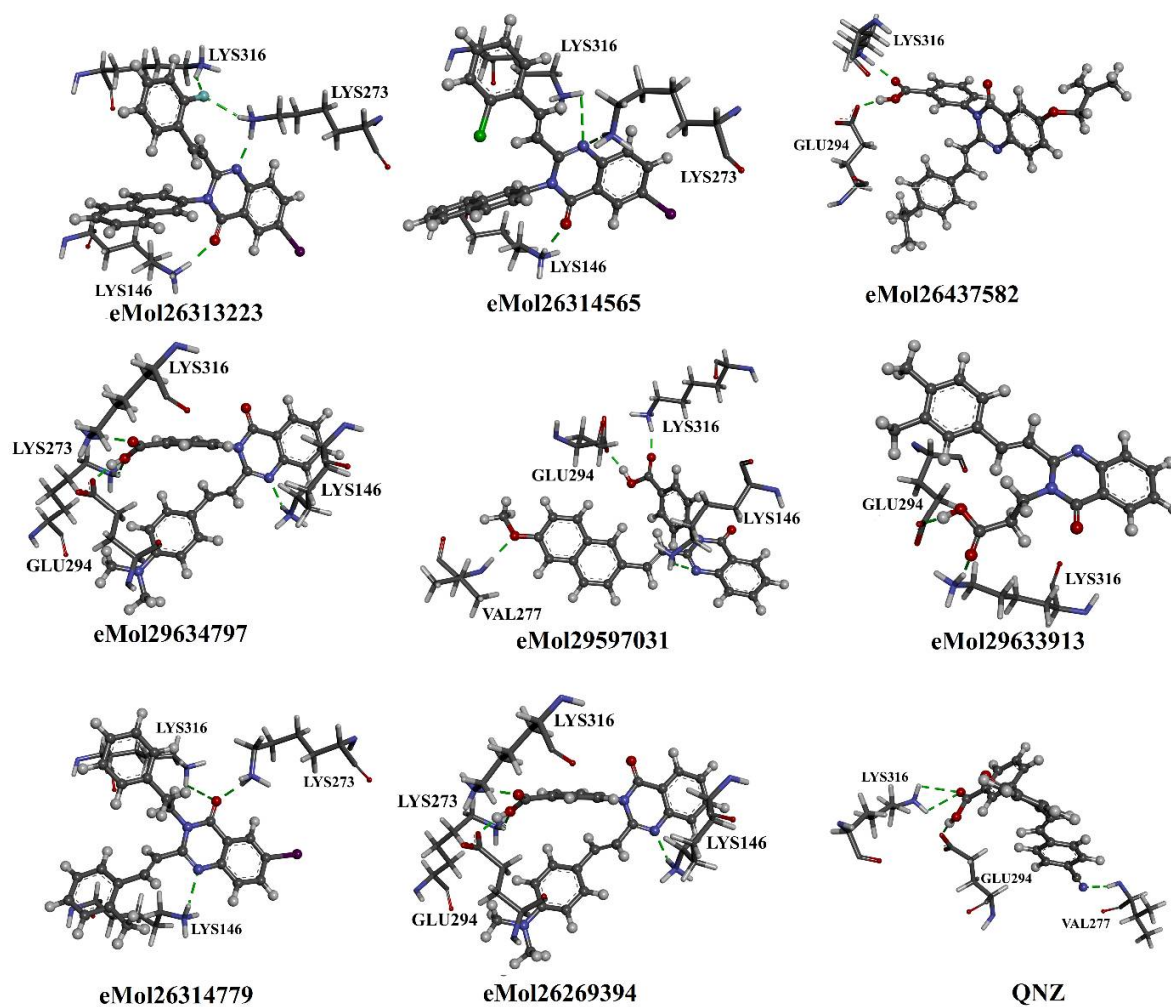

**Figure S7.** 3D representations of AMBER-based minimized structures of the eight potent molecules and QNZ in complex with the mutated PBP2a in acidic medium.

**Table S1.** Calculated conventional docking scores (in kcal/mol) for QNZ and the top 5000 potent allosteric inhibitors against mutated PBP2a allosteric site in acidic medium.

| No. | Compound Name/Code | Docking Score (kcal/mol) | No. | Compound Name/Code | Docking Score (kcal/mol) | No. | Compound Name/Code | Docking Score (kcal/mol) |
|-----|--------------------|--------------------------|-----|--------------------|--------------------------|-----|--------------------|--------------------------|
|     | QNZ                | -6.9                     | 49  | eMol23246696       | -8.5                     | 98  | eMol45585832       | -8.2                     |
| 1   | eMol30323345       | -9.8                     | 50  | eMol23157132       | -8.4                     | 99  | eMol956623         | -8.2                     |
| 2   | CHEMBL1214717      | -9.4                     | 51  | CHEMBL3818377      | -8.4                     | 100 | CHEMBL3818775      | -8.2                     |
| 3   | eMol29587310       | -9.4                     | 52  | eMol31786896       | -8.4                     | 101 | eMol46480173       | -8.2                     |
| 4   | eMol45585846       | -9.4                     | 53  | eMol19076714       | -8.4                     | 102 | eMol24530483       | -8.2                     |
| 5   | eMol23239806       | -9.3                     | 54  | eMol579568         | -8.4                     | 103 | eMol26437582       | -8.2                     |
| 6   | CHEMBL1214718      | -9.2                     | 55  | eMol300994534      | -8.4                     | 104 | eMol6263471        | -8.2                     |
| 7   | eMol29597031       | -9.2                     | 56  | eMol48938145       | -8.4                     | 105 | eMol681936         | -8.2                     |
| 8   | eMol45585848       | -9.2                     | 57  | eMol18962382       | -8.4                     | 106 | CHEMBL1558437      | -8.2                     |
| 9   | eMol23186178       | -9.1                     | 58  | eMol24519844       | -8.4                     | 107 | eMol26809774       | -8.2                     |
| 10  | eMol18542844       | -9.1                     | 59  | eMol27202240       | -8.4                     | 108 | eMol26330545       | -8.2                     |
| 11  | eMol30323633       | -9.0                     | 60  | eMol27202248       | -8.4                     | 109 | CHEMBL3818929      | -8.2                     |
| 12  | CHEMBL1534883      | -9.0                     | 61  | CHEMBL1215080      | -8.4                     | 110 | eMol1088331        | -8.2                     |
| 13  | eMol1344114        | -9.0                     | 62  | eMol43906059       | -8.4                     | 111 | eMol26314565       | -8.2                     |
| 14  | eMol24519694       | -9.0                     | 63  | CHEMBL4103504      | -8.3                     | 112 | eMol26319231       | -8.2                     |
| 15  | eMol19076718       | -8.9                     | 64  | eMol27202910       | -8.3                     | 113 | eMol46480165       | -8.2                     |
| 16  | eMol26313117       | -8.9                     | 65  | eMol31532412       | -8.3                     | 114 | eMol20347873       | -8.2                     |
| 17  | eMol19076712       | -8.9                     | 66  | CHEMBL395193       | -8.3                     | 115 | eMol206926236      | -8.2                     |
| 18  | CHEMBL1214794      | -8.9                     | 67  | eMol23239141       | -8.3                     | 116 | eMol300094331      | -8.2                     |
| 19  | eMol26196290       | -8.9                     | 68  | eMol26313223       | -8.3                     | 117 | eMol23178762       | -8.1                     |
| 20  | eMol45585824       | -8.9                     | 69  | CHEMBL3805924      | -8.3                     | 118 | eMol4518648        | -8.1                     |
| 21  | CHEMBL1214720      | -8.8                     | 70  | eMol23181799       | -8.3                     | 119 | CHEMBL1214935      | -8.1                     |
| 22  | eMol30341049       | -8.8                     | 71  | eMol23175530       | -8.3                     | 120 | eMol18550846       | -8.1                     |
| 23  | eMol43906045       | -8.8                     | 72  | CHEMBL3818584      | -8.3                     | 121 | eMol43906051       | -8.1                     |
| 24  | eMol20379909       | -8.8                     | 73  | eMol18542848       | -8.3                     | 122 | eMol566574         | -8.1                     |
| 25  | eMol18542846       | -8.8                     | 74  | eMol27202258       | -8.3                     | 123 | CHEMBL3819445      | -8.1                     |
| 26  | eMol20337486       | -8.8                     | 75  | eMol679826         | -8.3                     | 124 | eMol20368046       | -8.1                     |
| 27  | eMol20378769       | -8.7                     | 76  | eMol25810071       | -8.3                     | 125 | eMol27252412       | -8.1                     |
| 28  | eMol31781482       | -8.7                     | 77  | eMol25810075       | -8.3                     | 126 | CHEMBL1214647      | -8.1                     |
| 29  | eMol2403964        | -8.7                     | 78  | eMol25810083       | -8.3                     | 127 | CHEMBL508966       | -8.1                     |
| 30  | eMol1166007        | -8.7                     | 79  | eMol26242044       | -8.3                     | 128 | eMol2992482        | -8.1                     |
| 31  | CHEMBL1214938      | -8.7                     | 80  | eMol193446288      | -8.3                     | 129 | eMol46490873       | -8.1                     |
| 32  | eMol20375178       | -8.7                     | 81  | eMol25819217       | -8.3                     | 130 | CHEMBL3817888      | -8.1                     |
| 33  | CHEMBL1214941      | -8.6                     | 82  | CHEMBL1215003      | -8.2                     | 131 | eMol26314779       | -8.1                     |
| 34  | eMol19076754       | -8.6                     | 83  | CHEMBL518358       | -8.2                     | 132 | eMol27202956       | -8.1                     |
| 35  | eMol19076742       | -8.6                     | 84  | eMol29653471       | -8.2                     | 133 | eMol566488         | -8.1                     |
| 36  | eMol23241028       | -8.6                     | 85  | eMol43906053       | -8.2                     | 134 | eMol20361212       | -8.1                     |
| 37  | eMol30323569       | -8.6                     | 86  | eMol45622745       | -8.2                     | 135 | eMol27202348       | -8.1                     |
| 38  | CHEMBL1215648      | -8.6                     | 87  | eMol587826         | -8.2                     | 136 | eMol2992792        | -8.1                     |
| 39  | eMol26196326       | -8.6                     | 88  | eMol588192         | -8.2                     | 137 | eMol26264570       | -8.1                     |
| 40  | eMol45585842       | -8.6                     | 89  | CHEMBL1214713      | -8.2                     | 138 | eMol26293960       | -8.1                     |
| 41  | eMol565168         | -8.6                     | 90  | CHEMBL1384683      | -8.2                     | 139 | eMol565798         | -8.1                     |
| 42  | CHEMBL1215650      | -8.5                     | 91  | eMol23243407       | -8.2                     | 140 | eMol11920256       | -8.1                     |
| 43  | CHEMBL1579061      | -8.5                     | 92  | eMol26270654       | -8.2                     | 141 | eMol4562556        | -8.1                     |
| 44  | eMol26269394       | -8.5                     | 93  | eMol46365626       | -8.2                     | 142 | eMol16797514       | -8.1                     |
| 45  | CHEMBL1215649      | -8.5                     | 94  | CHEMBL1214936      | -8.2                     | 143 | eMol26242050       | -8.1                     |
| 46  | eMol22447774       | -8.5                     | 95  | eMol26196312       | -8.2                     | 144 | eMol23147497       | -8.1                     |
| 47  | eMol26196316       | -8.5                     | 96  | eMol26242034       | -8.2                     | 145 | CHEMBL1443074      | -8.0                     |
| 48  | CHEMBL3818129      | -8.5                     | 97  | eMol299980544      | -8.2                     | 146 | eMol18940433       | -8.0                     |

Table S1. *Continued.*

| No. | Compound Name/Code | Docking Score (kcal/mol) | No. | Compound Name/Code | Docking Score (kcal/mol) | No. | Compound Name/Code | Docking Score (kcal/mol) |
|-----|--------------------|--------------------------|-----|--------------------|--------------------------|-----|--------------------|--------------------------|
| 147 | eMol26242018       | -8.0                     | 196 | eMol1035565        | -7.9                     | 245 | eMol4552457        | -7.8                     |
| 148 | eMol27202760       | -8.0                     | 197 | eMol26242038       | -7.9                     | 246 | eMol679554         | -7.8                     |
| 149 | eMol30248263       | -8.0                     | 198 | eMol31297102       | -7.9                     | 247 | CHEMBL1212961      | -7.8                     |
| 150 | eMol43731200       | -8.0                     | 199 | eMol4381378        | -7.9                     | 248 | eMol18550688       | -7.8                     |
| 151 | eMol679556         | -8.0                     | 200 | eMol679552         | -7.9                     | 249 | eMol24313582       | -7.8                     |
| 152 | eMol679822         | -8.0                     | 201 | eMol19266609       | -7.9                     | 250 | eMol27406062       | -7.8                     |
| 153 | CHEMBL1215797      | -8.0                     | 202 | eMol23190351       | -7.9                     | 251 | eMol300136046      | -7.8                     |
| 154 | eMol20377597       | -8.0                     | 203 | eMol26242032       | -7.9                     | 252 | eMol314064301      | -7.8                     |
| 155 | eMol27091498       | -8.0                     | 204 | eMol30671942       | -7.9                     | 253 | eMol46480212       | -7.8                     |
| 156 | eMol4397966        | -8.0                     | 205 | eMol33366267       | -7.9                     | 254 | eMol566288         | -7.8                     |
| 157 | eMol4577396        | -8.0                     | 206 | eMol36912832       | -7.9                     | 255 | eMol26315830       | -7.8                     |
| 158 | CHEMBL1214648      | -8.0                     | 207 | eMol46363574       | -7.9                     | 256 | eMol4579154        | -7.8                     |
| 159 | CHEMBL3818572      | -8.0                     | 208 | eMol75958504       | -7.9                     | 257 | eMol46367311       | -7.8                     |
| 160 | eMol13856171       | -8.0                     | 209 | eMol587628         | -7.9                     | 258 | CHEMBL3819597      | -7.8                     |
| 161 | eMol27091674       | -8.0                     | 210 | eMol1035521        | -7.9                     | 259 | eMol206970196      | -7.8                     |
| 162 | eMol43906055       | -8.0                     | 211 | eMol20342278       | -7.9                     | 260 | eMol29633913       | -7.8                     |
| 163 | eMol4558540        | -8.0                     | 212 | eMol20378767       | -7.9                     | 261 | eMol4555647        | -7.8                     |
| 164 | CHEMBL1601398      | -8.0                     | 213 | eMol25908513       | -7.9                     | 262 | eMol45622743       | -7.8                     |
| 165 | eMol2507718        | -8.0                     | 214 | eMol26309353       | -7.9                     | 263 | eMol4581546        | -7.8                     |
| 166 | eMol26242046       | -8.0                     | 215 | CHEMBL2259943      | -7.9                     | 264 | CHEMBL2403015      | -7.8                     |
| 167 | eMol36912834       | -8.0                     | 216 | CHEMBL3818035      | -7.9                     | 265 | eMol20342220       | -7.8                     |
| 168 | eMol580072         | -8.0                     | 217 | eMol27091442       | -7.9                     | 266 | eMol24520354       | -7.8                     |
| 169 | eMol28321864       | -8.0                     | 218 | eMol56752349       | -7.9                     | 267 | eMol27202992       | -7.8                     |
| 170 | eMol579718         | -8.0                     | 219 | CHEMBL3819481      | -7.9                     | 268 | eMol29638777       | -7.8                     |
| 171 | CHEMBL1215578      | -8.0                     | 220 | CHEMBL462179       | -7.9                     | 269 | eMol45622749       | -7.8                     |
| 172 | eMol1755402        | -8.0                     | 221 | eMol179164959      | -7.9                     | 270 | CHEMBL1214861      | -7.8                     |
| 173 | eMol18551342       | -8.0                     | 222 | eMol206910852      | -7.9                     | 271 | eMol25813417       | -7.8                     |
| 174 | CHEMBL3818732      | -8.0                     | 223 | eMol25810001       | -7.9                     | 272 | eMol208103615      | -7.8                     |
| 175 | eMol206992517      | -8.0                     | 224 | eMol25810077       | -7.9                     | 273 | eMol29565259       | -7.8                     |
| 176 | eMol256911679      | -8.0                     | 225 | eMol27202994       | -7.9                     | 274 | eMol45585838       | -7.8                     |
| 177 | eMol27202252       | -8.0                     | 226 | eMol43906047       | -7.9                     | 275 | eMol561887         | -7.8                     |
| 178 | eMol301527162      | -8.0                     | 227 | eMol43906063       | -7.9                     | 276 | eMol23202652       | -7.8                     |
| 179 | eMol579756         | -8.0                     | 228 | eMol679550         | -7.9                     | 277 | eMol26242026       | -7.8                     |
| 180 | eMol679664         | -8.0                     | 229 | CHEMBL3582080      | -7.9                     | 278 | eMol26242040       | -7.8                     |
| 181 | CHEMBL2259944      | -8.0                     | 230 | eMol177199339      | -7.9                     | 280 | eMol4555657        | -7.8                     |
| 182 | CHEMBL485839       | -8.0                     | 231 | eMol20342262       | -7.9                     | 281 | eMol4572924        | -7.8                     |
| 183 | eMol27202242       | -8.0                     | 232 | eMol206911267      | -7.9                     | 282 | CHEMBL3819187      | -7.8                     |
| 184 | eMol4552519        | -8.0                     | 233 | eMol300994251      | -7.9                     | 283 | eMol4389171        | -7.8                     |
| 185 | eMol25810089       | -8.0                     | 234 | eMol46480254       | -7.9                     | 279 | eMol4740224        | -7.8                     |
| 186 | eMol4581322        | -8.0                     | 235 | eMol48768479       | -7.9                     | 284 | eMol30646140       | -7.7                     |
| 187 | eMol679670         | -8.0                     | 236 | eMol566380         | -7.9                     | 285 | eMol4580802        | -7.7                     |
| 188 | eMol679824         | -8.0                     | 237 | eMol581308         | -7.9                     | 286 | eMol58034831       | -7.7                     |
| 189 | CHEMBL1215081      | -7.9                     | 238 | eMol681814         | -7.9                     | 287 | eMol72993476       | -7.7                     |
| 190 | eMol24389393       | -7.9                     | 239 | CHEMBL2259942      | -7.8                     | 288 | eMol1748795        | -7.7                     |
| 191 | eMol25966646       | -7.9                     | 240 | CHEMBL3819186      | -7.8                     | 289 | eMol179165002      | -7.7                     |
| 192 | eMol26196328       | -7.9                     | 241 | eMol179164947      | -7.8                     | 290 | eMol206985996      | -7.7                     |
| 193 | eMol26242022       | -7.9                     | 242 | eMol19267414       | -7.8                     | 291 | eMol26310961       | -7.7                     |
| 194 | eMol45585844       | -7.9                     | 243 | eMol26251042       | -7.8                     | 292 | eMol27202264       | -7.7                     |
| 195 | eMol4566756        | -7.9                     | 244 | eMol27380659       | -7.8                     | 293 | eMol4446697        | -7.7                     |

Table S1. Continued.

| No. | Compound Name/Code | Docking Score (kcal/mol) | No. | Compound Name/Code | Docking Score (kcal/mol) | No. | Compound Name/Code | Docking Score (kcal/mol) |
|-----|--------------------|--------------------------|-----|--------------------|--------------------------|-----|--------------------|--------------------------|
| 294 | eMol4579587        | -7.7                     | 346 | eMol25810163       | -7.6                     | 398 | eMol26312078       | -7.5                     |
| 295 | eMol25909178       | -7.7                     | 347 | eMol27202262       | -7.6                     | 399 | eMol26405201       | -7.5                     |
| 296 | eMol26311238       | -7.7                     | 348 | eMol27202268       | -7.6                     | 400 | eMol45935562       | -7.5                     |
| 297 | eMol300445092      | -7.7                     | 349 | eMol7635480        | -7.6                     | 401 | eMol46400681       | -7.5                     |
| 298 | eMol30665797       | -7.7                     | 350 | eMol935864         | -7.6                     | 402 | eMol24116475       | -7.5                     |
| 299 | CHEMBL1215004      | -7.7                     | 351 | CHEMBL3819338      | -7.6                     | 403 | eMol25896479       | -7.5                     |
| 300 | CHEMBL3817850      | -7.7                     | 352 | CHEMBL1215803      | -7.6                     | 404 | eMol4587779        | -7.5                     |
| 301 | eMol179165014      | -7.7                     | 353 | CHEMBL485838       | -7.6                     | 405 | eMol679668         | -7.5                     |
| 302 | eMol19076364       | -7.7                     | 354 | eMol26327269       | -7.6                     | 406 | CHEMBL1584455      | -7.5                     |
| 303 | eMol25965034       | -7.7                     | 355 | eMol588102         | -7.6                     | 407 | eMol26314331       | -7.5                     |
| 304 | eMol29587306       | -7.7                     | 356 | eMol8267101        | -7.6                     | 408 | eMol4386746        | -7.5                     |
| 305 | eMol4116278        | -7.7                     | 357 | eMol26242048       | -7.6                     | 409 | eMol4480890        | -7.5                     |
| 306 | eMol43731202       | -7.7                     | 358 | eMol3060078        | -7.6                     | 410 | eMol45935466       | -7.5                     |
| 307 | eMol45585836       | -7.7                     | 359 | eMol46480052       | -7.6                     | 411 | eMol19266607       | -7.5                     |
| 308 | eMol46480194       | -7.7                     | 360 | eMol956409         | -7.6                     | 412 | eMol206908008      | -7.5                     |
| 309 | eMol679666         | -7.7                     | 361 | eMol29634797       | -7.6                     | 413 | eMol26255667       | -7.5                     |
| 310 | eMol681860         | -7.7                     | 362 | eMol4574833        | -7.6                     | 414 | eMol300014864      | -7.5                     |
| 311 | CHEMBL1371074      | -7.7                     | 363 | eMol46210804       | -7.6                     | 415 | eMol316351191      | -7.5                     |
| 312 | eMol24511821       | -7.7                     | 364 | eMol46365712       | -7.6                     | 416 | eMol565754         | -7.5                     |
| 313 | eMol26242024       | -7.7                     | 365 | eMol1675430        | -7.6                     | 417 | eMol587646         | -7.5                     |
| 314 | eMol27202958       | -7.7                     | 366 | eMol25784115       | -7.6                     | 418 | CHEMBL38193326     | -7.5                     |
| 315 | eMol20342268       | -7.7                     | 367 | eMol2992488        | -7.6                     | 419 | CHEMBL602627       | -7.5                     |
| 316 | eMol233046940      | -7.7                     | 368 | eMol46509917       | -7.6                     | 420 | eMol18940061       | -7.5                     |
| 317 | CHEMBL1528362      | -7.7                     | 369 | eMol944638         | -7.6                     | 421 | eMol26313085       | -7.5                     |
| 318 | eMol19076348       | -7.7                     | 370 | CHEMBL1214868      | -7.6                     | 422 | eMol28321866       | -7.5                     |
| 319 | eMol24525196       | -7.7                     | 371 | eMol1764376        | -7.6                     | 423 | eMol43745241       | -7.5                     |
| 320 | eMol26141700       | -7.7                     | 372 | eMol18958642       | -7.6                     | 424 | eMol4567258        | -7.5                     |
| 321 | eMol26311024       | -7.7                     | 373 | eMol20377433       | -7.6                     | 425 | eMol4580053        | -7.5                     |
| 322 | eMol27202742       | -7.7                     | 374 | eMol26683947       | -7.6                     | 426 | eMol46528447       | -7.5                     |
| 323 | eMol4413761        | -7.7                     | 375 | eMol3318312        | -7.6                     | 427 | eMol49384601       | -7.5                     |
| 324 | CHEMBL517897       | -7.7                     | 376 | eMol4577787        | -7.6                     | 428 | eMol50556474       | -7.5                     |
| 325 | eMol20342205       | -7.7                     | 377 | eMol5779489        | -7.6                     | 429 | eMol566256         | -7.5                     |
| 326 | eMol23249723       | -7.7                     | 378 | CHEMBL520033       | -7.5                     | 430 | eMol1040103        | -7.5                     |
| 327 | eMol43744848       | -7.7                     | 379 | eMol17203477       | -7.5                     | 431 | eMol20337444       | -7.5                     |
| 328 | eMol48982653       | -7.7                     | 380 | eMol18860491       | -7.5                     | 432 | eMol206985560      | -7.5                     |
| 329 | CHEMBL3805841      | -7.7                     | 381 | eMol193447787      | -7.5                     | 433 | eMol25816251       | -7.5                     |
| 330 | CHEMBL3817906      | -7.7                     | 382 | CHEMBL3817957      | -7.5                     | 434 | eMol27187406       | -7.5                     |
| 331 | eMol25955419       | -7.7                     | 383 | CHEMBL3818012      | -7.5                     | 435 | eMol3535618        | -7.5                     |
| 332 | eMol562493         | -7.7                     | 384 | eMol16374637       | -7.5                     | 436 | eMol4551561        | -7.5                     |
| 333 | eMol588242         | -7.7                     | 385 | eMol24029848       | -7.5                     | 437 | eMol46479990       | -7.5                     |
| 334 | eMol7667302        | -7.7                     | 386 | eMol3427847        | -7.5                     | 438 | eMol566118         | -7.5                     |
| 335 | eMol26242042       | -7.6                     | 387 | eMol43906067       | -7.5                     | 439 | eMol588256         | -7.5                     |
| 336 | eMol43731476       | -7.6                     | 388 | eMol4448933        | -7.5                     | 440 | eMol6753441        | -7.5                     |
| 337 | eMol588388         | -7.6                     | 389 | eMol51435800       | -7.5                     | 441 | CHEMBL114364       | -7.5                     |
| 338 | CHEMBL323866       | -7.6                     | 390 | eMol11690694       | -7.5                     | 442 | CHEMBL250917       | -7.5                     |
| 339 | eMol2992508        | -7.6                     | 391 | eMol16683412       | -7.5                     | 443 | CHEMBL3818515      | -7.5                     |
| 340 | eMol43757885       | -7.6                     | 392 | eMol27202960       | -7.5                     | 444 | eMol1429358        | -7.5                     |
| 341 | eMol7265152        | -7.6                     | 393 | eMol45944068       | -7.5                     | 445 | eMol1679768        | -7.5                     |
| 342 | CHEMBL3819140      | -7.6                     | 394 | eMol935130         | -7.5                     | 446 | eMol2208925        | -7.5                     |
| 343 | eMol3103759        | -7.6                     | 395 | eMol1751766        | -7.5                     | 447 | eMol23250559       | -7.5                     |
| 344 | eMol32369766       | -7.6                     | 396 | eMol206987969      | -7.5                     | 448 | CHEMBL114364       | -7.5                     |
| 345 | eMol4726858        | -7.6                     | 397 | eMol233088901      | -7.5                     | 449 | CHEMBL250917       | -7.5                     |

Table S1. *Continued.*

| No. | Compound Name/Code | Docking Score (kcal/mol) | No. | Compound Name/Code | Docking Score (kcal/mol) | No. | Compound Name/Code | Docking Score (kcal/mol) |
|-----|--------------------|--------------------------|-----|--------------------|--------------------------|-----|--------------------|--------------------------|
| 448 | eMol25810127       | -7.5                     | 500 | eMol26242054       | -7.4                     | 552 | eMol25901925       | -7.3                     |
| 449 | eMol27202290       | -7.5                     | 501 | eMol26316348       | -7.4                     | 553 | eMol26245604       | -7.3                     |
| 450 | eMol45701494       | -7.5                     | 502 | eMol27202980       | -7.4                     | 554 | eMol26259383       | -7.3                     |
| 451 | eMol23247039       | -7.4                     | 503 | eMol43906057       | -7.4                     | 555 | eMol26324339       | -7.3                     |
| 452 | eMol24493983       | -7.4                     | 504 | eMol46479912       | -7.4                     | 556 | eMol299991997      | -7.3                     |
| 453 | eMol24520756       | -7.4                     | 505 | eMol46479980       | -7.4                     | 557 | eMol4075283        | -7.3                     |
| 454 | eMol25965334       | -7.4                     | 506 | CHEMBL3818704      | -7.4                     | 558 | eMol44673597       | -7.3                     |
| 455 | eMol26320021       | -7.4                     | 507 | eMol26242036       | -7.4                     | 559 | eMol4485131        | -7.3                     |
| 456 | eMol37002179       | -7.4                     | 508 | eMol565478         | -7.4                     | 560 | eMol4708971        | -7.3                     |
| 457 | eMol4388132        | -7.4                     | 509 | CHEMBL1402619      | -7.4                     | 561 | eMol561655         | -7.3                     |
| 458 | eMol46480026       | -7.4                     | 510 | CHEMBL3805023      | -7.4                     | 562 | eMol956477         | -7.3                     |
| 459 | eMol579044         | -7.4                     | 511 | eMol1025907        | -7.4                     | 563 | CHEMBL3818910      | -7.3                     |
| 460 | eMol587808         | -7.4                     | 512 | eMol16351683       | -7.4                     | 564 | eMol207355370      | -7.3                     |
| 461 | eMol588272         | -7.4                     | 513 | eMol206875270      | -7.4                     | 565 | eMol24520050       | -7.3                     |
| 462 | CHEMBL117642       | -7.4                     | 514 | eMol25810171       | -7.4                     | 566 | eMol25918241       | -7.3                     |
| 463 | CHEMBL1994876      | -7.4                     | 515 | eMol25937897       | -7.4                     | 567 | eMol26242052       | -7.3                     |
| 464 | eMol27202402       | -7.4                     | 516 | eMol26311934       | -7.4                     | 568 | eMol26300049       | -7.3                     |
| 465 | eMol3018072        | -7.4                     | 517 | eMol26936203       | -7.4                     | 569 | eMol4578697        | -7.3                     |
| 466 | eMol46210806       | -7.4                     | 518 | eMol27202936       | -7.4                     | 570 | eMol4715267        | -7.3                     |
| 467 | eMol75932399       | -7.4                     | 519 | eMol27202948       | -7.4                     | 571 | CHEMBL455639       | -7.3                     |
| 468 | CHEMBL1499977      | -7.4                     | 520 | eMol299962831      | -7.4                     | 572 | eMol1040791        | -7.3                     |
| 469 | eMol20354197       | -7.4                     | 521 | eMol566142         | -7.4                     | 573 | eMol1678605        | -7.3                     |
| 470 | eMol20378545       | -7.4                     | 522 | CHEMBL1360793      | -7.4                     | 574 | eMol27091590       | -7.3                     |
| 471 | eMol24427880       | -7.4                     | 523 | CHEMBL1988177      | -7.4                     | 575 | eMol27115486       | -7.3                     |
| 472 | eMol24428326       | -7.4                     | 524 | CHEMBL3805378      | -7.4                     | 576 | eMol316344188      | -7.3                     |
| 473 | eMol26356948       | -7.4                     | 525 | CHEMBL511010       | -7.4                     | 577 | CHEMBL3582082      | -7.3                     |
| 474 | eMol27202250       | -7.4                     | 526 | eMol20356176       | -7.4                     | 578 | eMol1149947        | -7.3                     |
| 475 | eMol27203000       | -7.4                     | 527 | eMol30017880       | -7.4                     | 579 | eMol179165005      | -7.3                     |
| 476 | eMol2993022        | -7.4                     | 528 | eMol4934666        | -7.4                     | 580 | eMol180102976      | -7.3                     |
| 477 | eMol46479157       | -7.4                     | 529 | eMol16352353       | -7.4                     | 581 | eMol20375154       | -7.3                     |
| 478 | eMol24058094       | -7.4                     | 530 | eMol179177638      | -7.4                     | 582 | eMol26262902       | -7.3                     |
| 479 | eMol24524408       | -7.4                     | 531 | eMol19076404       | -7.4                     | 583 | eMol26314721       | -7.3                     |
| 480 | eMol26189153       | -7.4                     | 532 | eMol25902329       | -7.4                     | 584 | eMol46370139       | -7.3                     |
| 481 | eMol27202902       | -7.4                     | 533 | eMol45928112       | -7.4                     | 585 | eMol565838         | -7.3                     |
| 482 | eMol27338418       | -7.4                     | 534 | eMol4698359        | -7.4                     | 586 | CHEMBL116634       | -7.3                     |
| 483 | eMol44127206       | -7.4                     | 535 | eMol4739467        | -7.4                     | 587 | eMol19076688       | -7.3                     |
| 484 | eMol4521223        | -7.4                     | 536 | CHEMBL1214645      | -7.3                     | 588 | eMol206964256      | -7.3                     |
| 485 | eMol181128729      | -7.4                     | 537 | CHEMBL1215006      | -7.3                     | 589 | eMol23191317       | -7.3                     |
| 486 | eMol26246365       | -7.4                     | 538 | eMol1683032        | -7.3                     | 590 | eMol25902283       | -7.3                     |
| 487 | eMol26327656       | -7.4                     | 539 | eMol24538139       | -7.3                     | 591 | eMol26230266       | -7.3                     |
| 488 | eMol32812942       | -7.4                     | 540 | eMol26250892       | -7.3                     | 592 | eMol26315986       | -7.3                     |
| 489 | eMol46411087       | -7.4                     | 541 | eMol276247952      | -7.3                     | 593 | eMol276247970      | -7.3                     |
| 490 | eMol4725672        | -7.4                     | 542 | eMol299966748      | -7.3                     | 594 | eMol300990951      | -7.3                     |
| 491 | eMol581076         | -7.4                     | 543 | eMol300978663      | -7.3                     | 595 | eMol31358919       | -7.3                     |
| 492 | eMol956403         | -7.4                     | 544 | eMol4090808        | -7.3                     | 596 | eMol43745829       | -7.3                     |
| 493 | eMol9919488        | -7.4                     | 545 | eMol4566508        | -7.3                     | 597 | eMol1764190        | -7.3                     |
| 494 | CHEMBL1215082      | -7.4                     | 546 | eMol4713633        | -7.3                     | 598 | eMol207259512      | -7.3                     |
| 495 | CHEMBL3819363      | -7.4                     | 547 | eMol4732807        | -7.3                     | 599 | eMol23206884       | -7.3                     |
| 496 | CHEMBL3819532      | -7.4                     | 548 | CHEMBL397391       | -7.3                     | 600 | eMol23242679       | -7.3                     |
| 497 | CHEMBL82690        | -7.4                     | 549 | eMol1324430        | -7.3                     | 601 | eMol2385157        | -7.3                     |
| 498 | eMol25903079       | -7.4                     | 550 | eMol206850549      | -7.3                     | 602 | eMol24520802       | -7.3                     |
| 499 | eMol25903125       | -7.4                     | 551 | eMol24526444       | -7.3                     | 603 | eMol24532024       | -7.3                     |



Table S1. Continued.

| No. | Compound Name/Code | Docking Score (kcal/mol) | No. | Compound Name/Code | Docking Score (kcal/mol) | No. | Compound Name/Code | Docking Score (kcal/mol) |
|-----|--------------------|--------------------------|-----|--------------------|--------------------------|-----|--------------------|--------------------------|
| 604 | eMol25797977       | -7.3                     | 654 | eMol316831112      | -7.2                     | 704 | CHEMBL3806097      | -7.2                     |
| 605 | eMol27202984       | -7.3                     | 655 | eMol35699388       | -7.2                     | 705 | CHEMBL577676       | -7.2                     |
| 606 | eMol27202996       | -7.3                     | 656 | eMol43730464       | -7.2                     | 706 | CHEMBL585981       | -7.2                     |
| 607 | eMol27252901       | -7.3                     | 657 | eMol46479958       | -7.2                     | 707 | eMol18516265       | -7.2                     |
| 608 | eMol35717814       | -7.3                     | 658 | eMol935636         | -7.2                     | 708 | eMol18550720       | -7.2                     |
| 609 | eMol43745056       | -7.3                     | 659 | CHEMBL296691       | -7.2                     | 709 | eMol20337448       | -7.2                     |
| 610 | eMol4549830        | -7.3                     | 660 | eMol179164953      | -7.2                     | 710 | eMol2409922        | -7.2                     |
| 611 | eMol588158         | -7.3                     | 661 | eMol23208796       | -7.2                     | 711 | eMol24521662       | -7.2                     |
| 612 | eMol684240         | -7.3                     | 662 | eMol23241510       | -7.2                     | 712 | eMol25825125       | -7.2                     |
| 613 | eMol956435         | -7.3                     | 663 | eMol24521330       | -7.2                     | 713 | eMol27202756       | -7.2                     |
| 614 | CHEMBL115809       | -7.3                     | 664 | eMol25770408       | -7.2                     | 714 | eMol32813234       | -7.2                     |
| 615 | eMol1429356        | -7.3                     | 665 | eMol25902291       | -7.2                     | 715 | eMol4433627        | -7.2                     |
| 616 | eMol19076598       | -7.3                     | 666 | eMol25968613       | -7.2                     | 716 | eMol936632         | -7.2                     |
| 617 | eMol19076750       | -7.3                     | 667 | eMol26219237       | -7.2                     | 717 | eMol2231344        | -7.2                     |
| 618 | eMol206907968      | -7.3                     | 668 | eMol4726520        | -7.2                     | 718 | eMol23201309       | -7.2                     |
| 619 | eMol25907499       | -7.3                     | 669 | eMol5847921        | -7.2                     | 719 | eMol26300005       | -7.2                     |
| 620 | eMol25913211       | -7.3                     | 670 | eMol588228         | -7.2                     | 720 | eMol27202506       | -7.2                     |
| 621 | eMol25936279       | -7.3                     | 671 | eMol935898         | -7.2                     | 721 | eMol27202920       | -7.2                     |
| 622 | eMol27202388       | -7.3                     | 672 | CHEMBL3817866      | -7.2                     | 722 | eMol31760166       | -7.2                     |
| 623 | eMol300154219      | -7.3                     | 673 | CHEMBL4099863      | -7.2                     | 723 | eMol43746869       | -7.2                     |
| 624 | eMol4477952        | -7.3                     | 674 | CHEMBL47157        | -7.2                     | 724 | eMol4408548        | -7.2                     |
| 625 | eMol579714         | -7.3                     | 675 | CHEMBL579620       | -7.2                     | 725 | eMol4706083        | -7.2                     |
| 626 | eMol581304         | -7.3                     | 676 | eMol16056893       | -7.2                     | 726 | eMol565918         | -7.2                     |
| 627 | CHEMBL116408       | -7.3                     | 677 | eMol17192354       | -7.2                     | 727 | CHEMBL3806178      | -7.2                     |
| 628 | eMol2330950        | -7.3                     | 678 | eMol180102764      | -7.2                     | 728 | eMol18551352       | -7.2                     |
| 629 | eMol25895023       | -7.3                     | 679 | eMol19076602       | -7.2                     | 729 | eMol2130046        | -7.2                     |
| 630 | eMol25966304       | -7.3                     | 680 | eMol26285666       | -7.2                     | 730 | eMol23170772       | -7.2                     |
| 631 | eMol26285150       | -7.3                     | 681 | eMol26289047       | -7.2                     | 731 | eMol24518463       | -7.2                     |
| 632 | eMol26326968       | -7.3                     | 682 | eMol26314361       | -7.2                     | 732 | eMol25958221       | -7.2                     |
| 633 | eMol27202912       | -7.3                     | 683 | eMol26569999       | -7.2                     | 733 | eMol26277244       | -7.2                     |
| 634 | eMol27202970       | -7.3                     | 684 | eMol26936207       | -7.2                     | 734 | eMol26292416       | -7.2                     |
| 635 | eMol2880336        | -7.3                     | 685 | eMol27202540       | -7.2                     | 735 | eMol26310907       | -7.2                     |
| 636 | eMol30744925       | -7.3                     | 686 | eMol2768990        | -7.2                     | 736 | eMol26316052       | -7.2                     |
| 637 | eMol43731530       | -7.3                     | 687 | eMol4606566        | -7.2                     | 737 | eMol26328784       | -7.2                     |
| 638 | eMol46400679       | -7.3                     | 688 | eMol46370137       | -7.2                     | 738 | eMol27202410       | -7.2                     |
| 639 | eMol4728946        | -7.3                     | 689 | eMol46400677       | -7.2                     | 739 | eMol27202762       | -7.2                     |
| 640 | eMol8238281        | -7.3                     | 690 | eMol46491554       | -7.2                     | 740 | eMol32813226       | -7.2                     |
| 641 | CHEMBL3818933      | -7.3                     | 691 | eMol4713307        | -7.2                     | 741 | eMol33346435       | -7.2                     |
| 642 | eMol11071566       | -7.3                     | 692 | CHEMBL117438       | -7.2                     | 742 | eMol4490859        | -7.2                     |
| 643 | eMol24521048       | -7.3                     | 693 | CHEMBL3818229      | -7.2                     | 743 | eMol46445765       | -7.2                     |
| 644 | eMol25771182       | -7.3                     | 694 | eMol22370884       | -7.2                     | 744 | eMol46479996       | -7.2                     |
| 645 | eMol29649914       | -7.3                     | 695 | eMol27045407       | -7.2                     | 745 | CHEMBL326628       | -7.2                     |
| 646 | eMol45622753       | -7.3                     | 696 | eMol27202398       | -7.2                     | 746 | CHEMBL4079984      | -7.2                     |
| 647 | eMol588168         | -7.3                     | 697 | eMol27202754       | -7.2                     | 747 | eMol1120546        | -7.2                     |
| 648 | CHEMBL116817       | -7.2                     | 698 | eMol27202914       | -7.2                     | 748 | eMol181109768      | -7.2                     |
| 649 | CHEMBL1632342      | -7.2                     | 699 | eMol27202918       | -7.2                     | 749 | eMol27202350       | -7.2                     |
| 650 | eMol179164956      | -7.2                     | 700 | eMol32246523       | -7.2                     | 750 | eMol43731774       | -7.2                     |
| 651 | eMol24419686       | -7.2                     | 701 | eMol4709495        | -7.2                     | 751 | eMol45133343       | -7.2                     |
| 652 | eMol26285928       | -7.2                     | 702 | eMol4718679        | -7.2                     | 752 | eMol46400687       | -7.2                     |
| 653 | eMol27202916       | -7.2                     | 703 | eMol5444969        | -7.2                     | 753 | eMol566406         | -7.2                     |

Table S1. *Continued.*

| No. | Compound Name/Code | Docking Score (kcal/mol) | No. | Compound Name/Code | Docking Score (kcal/mol) | No. | Compound Name/Code | Docking Score (kcal/mol) |
|-----|--------------------|--------------------------|-----|--------------------|--------------------------|-----|--------------------|--------------------------|
| 754 | eMol679820         | -7.2                     | 806 | eMol587916         | -7.1                     | 858 | eMol27187414       | -7.1                     |
| 755 | CHEMBL3805042      | -7.2                     | 807 | CHEMBL34185        | -7.1                     | 859 | eMol27202282       | -7.1                     |
| 756 | CHEMBL3819311      | -7.2                     | 808 | CHEMBL3804857      | -7.1                     | 860 | eMol30104228       | -7.1                     |
| 757 | eMol206921779      | -7.2                     | 809 | CHEMBL3818747      | -7.1                     | 861 | eMol5444645        | -7.1                     |
| 758 | eMol2141753        | -7.2                     | 810 | CHEMBL38330        | -7.1                     | 862 | eMol5444883        | -7.1                     |
| 759 | eMol23246986       | -7.2                     | 811 | eMol20337442       | -7.1                     | 863 | eMol588078         | -7.1                     |
| 760 | eMol24113359       | -7.2                     | 812 | eMol20380394       | -7.1                     | 864 | CHEMBL3818856      | -7.1                     |
| 761 | eMol24428240       | -7.2                     | 813 | eMol23185851       | -7.1                     | 865 | eMol18542840       | -7.1                     |
| 762 | eMol24520240       | -7.2                     | 814 | eMol25770418       | -7.1                     | 866 | eMol24428006       | -7.1                     |
| 763 | eMol25810099       | -7.2                     | 815 | eMol25902049       | -7.1                     | 867 | eMol2517109        | -7.1                     |
| 764 | eMol25829045       | -7.2                     | 816 | eMol26319543       | -7.1                     | 868 | eMol25819233       | -7.1                     |
| 765 | eMol27045405       | -7.2                     | 817 | eMol26936201       | -7.1                     | 869 | eMol25903659       | -7.1                     |
| 766 | eMol27045521       | -7.2                     | 818 | eMol3033983        | -7.1                     | 870 | eMol25945602       | -7.1                     |
| 767 | eMol30322739       | -7.2                     | 819 | eMol6263477        | -7.1                     | 871 | eMol25966294       | -7.1                     |
| 768 | eMol44548966       | -7.2                     | 820 | CHEMBL114005       | -7.1                     | 872 | eMol26189151       | -7.1                     |
| 769 | eMol45708568       | -7.2                     | 821 | CHEMBL3805407      | -7.1                     | 873 | eMol26312838       | -7.1                     |
| 770 | eMol4738130        | -7.2                     | 822 | eMol16351675       | -7.1                     | 874 | eMol26314117       | -7.1                     |
| 771 | eMol50301465       | -7.2                     | 823 | eMol24521248       | -7.1                     | 875 | eMol27202280       | -7.1                     |
| 772 | eMol1156520        | -7.2                     | 824 | eMol26264151       | -7.1                     | 876 | eMol27202380       | -7.1                     |
| 773 | eMol18550714       | -7.2                     | 825 | eMol26276502       | -7.1                     | 877 | eMol29665906       | -7.1                     |
| 774 | eMol18961180       | -7.2                     | 826 | eMol26313449       | -7.1                     | 878 | eMol32812998       | -7.1                     |
| 775 | eMol23241342       | -7.2                     | 827 | eMol26331720       | -7.1                     | 879 | eMol33339294       | -7.1                     |
| 776 | eMol24519079       | -7.2                     | 828 | eMol27202362       | -7.1                     | 880 | eMol4572232        | -7.1                     |
| 777 | eMol25963663       | -7.2                     | 829 | eMol33346433       | -7.1                     | 881 | eMol46545587       | -7.1                     |
| 778 | eMol26289870       | -7.2                     | 830 | eMol43731198       | -7.1                     | 882 | eMol48597407       | -7.1                     |
| 779 | eMol26330383       | -7.2                     | 831 | eMol45935468       | -7.1                     | 883 | eMol579510         | -7.1                     |
| 780 | eMol27202358       | -7.2                     | 832 | eMol46509913       | -7.1                     | 884 | eMol588368         | -7.1                     |
| 781 | eMol3317346        | -7.2                     | 833 | eMol4732869        | -7.1                     | 885 | CHEMBL1215796      | -7.1                     |
| 782 | CHEMBL1302012      | -7.1                     | 834 | CHEMBL113923       | -7.1                     | 886 | CHEMBL1591720      | -7.1                     |
| 783 | CHEMBL3806218      | -7.1                     | 835 | CHEMBL1383006      | -7.1                     | 887 | CHEMBL3818171      | -7.1                     |
| 784 | CHEMBL3818209      | -7.1                     | 836 | CHEMBL1559857      | -7.1                     | 888 | CHEMBL395117       | -7.1                     |
| 785 | CHEMBL3818582      | -7.1                     | 837 | CHEMBL3805665      | -7.1                     | 889 | eMol1165997        | -7.1                     |
| 786 | eMol18550716       | -7.1                     | 838 | eMol16351673       | -7.1                     | 890 | eMol20310561       | -7.1                     |
| 787 | eMol206980481      | -7.1                     | 839 | eMol19076826       | -7.1                     | 891 | eMol20378615       | -7.1                     |
| 788 | eMol26250339       | -7.1                     | 840 | eMol20380392       | -7.1                     | 892 | eMol206920578      | -7.1                     |
| 789 | eMol26310839       | -7.1                     | 841 | eMol25810081       | -7.1                     | 893 | eMol206965980      | -7.1                     |
| 790 | eMol43731776       | -7.1                     | 842 | eMol26251302       | -7.1                     | 894 | eMol2194316        | -7.1                     |
| 791 | eMol46534208       | -7.1                     | 843 | eMol26270766       | -7.1                     | 895 | eMol2408165        | -7.1                     |
| 792 | eMol5672543        | -7.1                     | 844 | eMol26276632       | -7.1                     | 896 | eMol24520553       | -7.1                     |
| 793 | CHEMBL1414265      | -7.1                     | 845 | eMol26314895       | -7.1                     | 897 | eMol25790309       | -7.1                     |
| 794 | CHEMBL247353       | -7.1                     | 846 | eMol26936209       | -7.1                     | 898 | eMol25913057       | -7.1                     |
| 795 | eMol16351883       | -7.1                     | 847 | eMol27187400       | -7.1                     | 899 | eMol26314359       | -7.1                     |
| 796 | eMol16375743       | -7.1                     | 848 | eMol4146706        | -7.1                     | 900 | eMol26315688       | -7.1                     |
| 797 | eMol17202599       | -7.1                     | 849 | eMol45932769       | -7.1                     | 901 | eMol27202336       | -7.1                     |
| 798 | eMol18866942       | -7.1                     | 850 | eMol936420         | -7.1                     | 902 | eMol27202496       | -7.1                     |
| 799 | eMol20344945       | -7.1                     | 851 | CHEMBL1551922      | -7.1                     | 903 | eMol27202778       | -7.1                     |
| 800 | eMol206964558      | -7.1                     | 852 | CHEMBL3818977      | -7.1                     | 904 | eMol300089978      | -7.1                     |
| 801 | eMol2115166        | -7.1                     | 853 | eMol206990555      | -7.1                     | 905 | eMol3181655        | -7.1                     |
| 802 | eMol23242609       | -7.1                     | 854 | eMol2166708        | -7.1                     | 906 | eMol579926         | -7.1                     |
| 803 | eMol26292060       | -7.1                     | 855 | eMol24524699       | -7.1                     | 907 | CHEMBL1439596      | -7.1                     |
| 804 | eMol36016142       | -7.1                     | 856 | eMol25771206       | -7.1                     | 908 | CHEMBL1562035      | -7.1                     |
| 805 | eMol560303         | -7.1                     | 857 | eMol26286396       | -7.1                     | 909 | CHEMBL3818499      | -7.1                     |

Table S1. Continued.

| No. | Compound Name/Code | Docking Score (kcal/mol) | No.  | Compound Name/Code | Docking Score (kcal/mol) | No.  | Compound Name/Code | Docking Score (kcal/mol) |
|-----|--------------------|--------------------------|------|--------------------|--------------------------|------|--------------------|--------------------------|
| 910 | CHEMBL3819196      | -7.1                     | 961  | eMol2308510        | -7.0                     | 1012 | CHEMBL3818158      | -7.0                     |
| 911 | CHEMBL550397       | -7.1                     | 962  | eMol25901881       | -7.0                     | 1013 | eMol18550710       | -7.0                     |
| 912 | eMol1035551        | -7.1                     | 963  | eMol26263266       | -7.0                     | 1014 | eMol24430685       | -7.0                     |
| 913 | eMol18550722       | -7.1                     | 964  | eMol26315041       | -7.0                     | 1015 | eMol2513652        | -7.0                     |
| 914 | eMol206849669      | -7.1                     | 965  | eMol26524217       | -7.0                     | 1016 | eMol25770414       | -7.0                     |
| 915 | eMol24430231       | -7.1                     | 966  | eMol46400683       | -7.0                     | 1017 | eMol25931375       | -7.0                     |
| 916 | eMol24531722       | -7.1                     | 967  | eMol4709315        | -7.0                     | 1018 | eMol26141682       | -7.0                     |
| 917 | eMol24531798       | -7.1                     | 968  | eMol72578631       | -7.0                     | 1019 | eMol26309887       | -7.0                     |
| 918 | eMol25912447       | -7.1                     | 969  | CHEMBL2297150      | -7.0                     | 1020 | eMol26313748       | -7.0                     |
| 919 | eMol26288955       | -7.1                     | 970  | CHEMBL3818347      | -7.0                     | 1021 | eMol26762439       | -7.0                     |
| 920 | eMol26326313       | -7.1                     | 971  | CHEMBL3818366      | -7.0                     | 1022 | eMol27202208       | -7.0                     |
| 921 | eMol26350850       | -7.1                     | 972  | eMol16379841       | -7.0                     | 1023 | eMol36015268       | -7.0                     |
| 922 | eMol27187440       | -7.1                     | 973  | eMol19076734       | -7.0                     | 1024 | eMol566554         | -7.0                     |
| 923 | eMol299994300      | -7.1                     | 974  | eMol19076828       | -7.0                     | 1025 | ChEBI114797        | -7.0                     |
| 924 | eMol3021959        | -7.1                     | 975  | eMol20356657       | -7.0                     | 1026 | CHEMBL1452417      | -7.0                     |
| 925 | eMol31278496       | -7.1                     | 976  | eMol23152351       | -7.0                     | 1027 | CHEMBL1967636      | -7.0                     |
| 926 | eMol36016132       | -7.1                     | 977  | eMol25816255       | -7.0                     | 1028 | CHEMBL3627816      | -7.0                     |
| 927 | eMol4491662        | -7.1                     | 978  | eMol25895009       | -7.0                     | 1029 | CHEMBL38232        | -7.0                     |
| 928 | eMol956263         | -7.1                     | 979  | eMol26310653       | -7.0                     | 1030 | CHEMBL90574        | -7.0                     |
| 929 | CHEMBL1423402      | -7.1                     | 980  | eMol26314551       | -7.0                     | 1031 | eMol16351609       | -7.0                     |
| 930 | CHEMBL1552848      | -7.1                     | 981  | eMol27202320       | -7.0                     | 1032 | eMol206978896      | -7.0                     |
| 931 | CHEMBL299107       | -7.1                     | 982  | eMol29987858       | -7.0                     | 1033 | eMol206996167      | -7.0                     |
| 932 | CHEMBL3804866      | -7.1                     | 983  | eMol3775722        | -7.0                     | 1034 | eMol2232474        | -7.0                     |
| 933 | eMol106491702      | -7.1                     | 984  | eMol4565043        | -7.0                     | 1035 | eMol23237618       | -7.0                     |
| 934 | eMol16351677       | -7.1                     | 985  | eMol565850         | -7.0                     | 1036 | eMol24520280       | -7.0                     |
| 935 | eMol206909136      | -7.1                     | 986  | eMol6157528        | -7.0                     | 1037 | eMol25827835       | -7.0                     |
| 936 | eMol23244410       | -7.1                     | 987  | CHEMBL1214934      | -7.0                     | 1038 | eMol25896473       | -7.0                     |
| 937 | eMol24520023       | -7.1                     | 988  | CHEMBL1900041      | -7.0                     | 1039 | eMol26262940       | -7.0                     |
| 938 | eMol24526765       | -7.1                     | 989  | CHEMBL2297667      | -7.0                     | 1040 | eMol26349365       | -7.0                     |
| 939 | eMol25784531       | -7.1                     | 990  | CHEMBL3818626      | -7.0                     | 1041 | eMol26355834       | -7.0                     |
| 940 | eMol25913175       | -7.1                     | 991  | eMol15983174       | -7.0                     | 1042 | eMol26581878       | -7.0                     |
| 941 | eMol25924517       | -7.1                     | 992  | eMol19076732       | -7.0                     | 1043 | eMol44057517       | -7.0                     |
| 942 | eMol26293580       | -7.1                     | 993  | eMol206965358      | -7.0                     | 1044 | eMol4719207        | -7.0                     |
| 943 | eMol26570001       | -7.1                     | 994  | eMol206987841      | -7.0                     | 1045 | eMol48554523       | -7.0                     |
| 944 | eMol27202232       | -7.1                     | 995  | eMol24427986       | -7.0                     | 1046 | eMol560313         | -7.0                     |
| 945 | eMol27202422       | -7.1                     | 996  | eMol24519100       | -7.0                     | 1047 | eMol566074         | -7.0                     |
| 946 | eMol316862506      | -7.1                     | 997  | eMol25895011       | -7.0                     | 1048 | eMol784256         | -7.0                     |
| 947 | eMol36904288       | -7.1                     | 998  | eMol26262168       | -7.0                     | 1049 | CHEMBL1357492      | -7.0                     |
| 948 | eMol43744846       | -7.1                     | 999  | eMol26299531       | -7.0                     | 1050 | eMol1324432        | -7.0                     |
| 949 | eMol679754         | -7.1                     | 1000 | eMol26324447       | -7.0                     | 1051 | eMol206979384      | -7.0                     |
| 950 | CHEMBL1373990      | -7.0                     | 1001 | eMol27202224       | -7.0                     | 1052 | eMol2194269        | -7.0                     |
| 951 | CHEMBL1394809      | -7.0                     | 1002 | eMol27202288       | -7.0                     | 1053 | eMol24548037       | -7.0                     |
| 952 | CHEMBL3804880      | -7.0                     | 1003 | eMol27202520       | -7.0                     | 1054 | eMol25903928       | -7.0                     |
| 953 | CHEMBL3819459      | -7.0                     | 1004 | eMol276260499      | -7.0                     | 1055 | eMol25964562       | -7.0                     |
| 954 | eMol1149869        | -7.0                     | 1005 | eMol29262171       | -7.0                     | 1056 | eMol2597848        | -7.0                     |
| 955 | eMol16352193       | -7.0                     | 1006 | eMol36016032       | -7.0                     | 1057 | eMol26237970       | -7.0                     |
| 956 | eMol17203597       | -7.0                     | 1007 | eMol4708889        | -7.0                     | 1058 | eMol26317983       | -7.0                     |
| 957 | eMol1752196        | -7.0                     | 1008 | eMol5779704        | -7.0                     | 1059 | eMol26775365       | -7.0                     |
| 958 | eMol19076370       | -7.0                     | 1009 | CHEMBL1553991      | -7.0                     | 1060 | eMol27187482       | -7.0                     |
| 959 | eMol206843436      | -7.0                     | 1010 | CHEMBL1882658      | -7.0                     | 1061 | eMol30132606       | -7.0                     |
| 960 | eMol206964210      | -7.0                     | 1011 | CHEMBL3805512      | -7.0                     | 1062 | eMol3138656        | -7.0                     |

Table S1. Continued.

| No.   | Compound Name/Code | Docking Score (kcal/mol) | No.   | Compound Name/Code | Docking Score (kcal/mol) | No.   | Compound Name/Code | Docking Score (kcal/mol) |
|-------|--------------------|--------------------------|-------|--------------------|--------------------------|-------|--------------------|--------------------------|
| 1063: | eMol36015282       | -7.0                     | 1114: | eMol206904349      | -7.0                     | 1165: | eMol300979175      | -6.9                     |
| 1064: | eMol46400685       | -7.0                     | 1115: | eMol24512023       | -7.0                     | 1166: | eMol36015346       | -6.9                     |
| 1065: | eMol46525150       | -7.0                     | 1116: | eMol25927095       | -7.0                     | 1167: | eMol36015494       | -6.9                     |
| 1066: | eMol4744993        | -7.0                     | 1117: | eMol27045527       | -7.0                     | 1168: | eMol43678312       | -6.9                     |
| 1067: | eMol49849265       | -7.0                     | 1118: | eMol27202360       | -7.0                     | 1169: | eMol46544815       | -6.9                     |
| 1068: | eMol685328         | -7.0                     | 1119: | eMol27202532       | -7.0                     | 1170: | eMol11867096       | -6.9                     |
| 1069: | CHEMBL3804836      | -7.0                     | 1120: | eMol27202896       | -7.0                     | 1171: | eMol17203549       | -6.9                     |
| 1070: | CHEMBL3818974      | -7.0                     | 1121: | eMol27435660       | -7.0                     | 1172: | eMol206964418      | -6.9                     |
| 1071: | CHEMBL3819285      | -7.0                     | 1122: | eMol43749117       | -7.0                     | 1173: | eMol206969744      | -6.9                     |
| 1072: | CHEMBL46581        | -7.0                     | 1123: | eMol4475588        | -7.0                     | 1174: | eMol206972648      | -6.9                     |
| 1073: | eMol18542077       | -7.0                     | 1124: | eMol45621707       | -7.0                     | 1175: | eMol206987102      | -6.9                     |
| 1074: | eMol19031814       | -7.0                     | 1125: | eMol4712268        | -7.0                     | 1176: | eMol22299802       | -6.9                     |
| 1075: | eMol24430273       | -7.0                     | 1126: | eMol4745700        | -7.0                     | 1177: | eMol24519081       | -6.9                     |
| 1076: | eMol25902841       | -7.0                     | 1127: | CHEMBL1451971      | -7.0                     | 1178: | eMol24546968       | -6.9                     |
| 1077: | eMol26263652       | -7.0                     | 1128: | CHEMBL18944        | -7.0                     | 1179: | eMol25810157       | -6.9                     |
| 1078: | eMol27202894       | -7.0                     | 1129: | CHEMBL3805136      | -7.0                     | 1180: | eMol25813419       | -6.9                     |
| 1079: | eMol30104216       | -7.0                     | 1130: | CHEMBL3819605      | -7.0                     | 1181: | eMol25913361       | -6.9                     |
| 1080: | eMol3091619        | -7.0                     | 1131: | eMol14069413       | -7.0                     | 1182: | eMol26141662       | -6.9                     |
| 1081: | eMol5538242        | -7.0                     | 1132: | eMol20352703       | -7.0                     | 1183: | eMol26249494       | -6.9                     |
| 1082: | eMol565910         | -7.0                     | 1133: | eMol23239776       | -7.0                     | 1184: | eMol26256475       | -6.9                     |
| 1083: | eMol935992         | -7.0                     | 1134: | eMol25896475       | -7.0                     | 1185: | eMol26264167       | -6.9                     |
| 1084: | eMol9989242        | -7.0                     | 1135: | eMol25902133       | -7.0                     | 1186: | eMol26300497       | -6.9                     |
| 1085: | CHEMBL1303106      | -7.0                     | 1136: | eMol25929538       | -7.0                     | 1187: | eMol26310555       | -6.9                     |
| 1086: | eMol1170739        | -7.0                     | 1137: | eMol25963073       | -7.0                     | 1188: | eMol27202884       | -6.9                     |
| 1087: | eMol19076366       | -7.0                     | 1138: | eMol25968661       | -7.0                     | 1189: | eMol276247954      | -6.9                     |
| 1088: | eMol206875356      | -7.0                     | 1139: | eMol26141678       | -7.0                     | 1190: | eMol300978919      | -6.9                     |
| 1089: | eMol24008012       | -7.0                     | 1140: | eMol26189265       | -7.0                     | 1191: | eMol35693189       | -6.9                     |
| 1090: | eMol25954676       | -7.0                     | 1141: | eMol26295757       | -7.0                     | 1192: | eMol36898082       | -6.9                     |
| 1091: | eMol25961619       | -7.0                     | 1142: | eMol26313219       | -7.0                     | 1193: | eMol679750         | -6.9                     |
| 1092: | eMol26245266       | -7.0                     | 1143: | eMol26327169       | -7.0                     | 1194: | eMol72964183       | -6.9                     |
| 1093: | eMol26290986       | -7.0                     | 1144: | eMol27202900       | -7.0                     | 1195: | eMol935934         | -6.9                     |
| 1094: | eMol26312834       | -7.0                     | 1145: | eMol276247964      | -7.0                     | 1196: | CHEMBL1867264      | -6.9                     |
| 1095: | eMol26314441       | -7.0                     | 1146: | eMol300206844      | -7.0                     | 1197: | CHEMBL2297819      | -6.9                     |
| 1096: | eMol26398726       | -7.0                     | 1147: | eMol300261457      | -7.0                     | 1198: | CHEMBL3818554      | -6.9                     |
| 1097: | eMol27202758       | -7.0                     | 1148: | eMol30083452       | -7.0                     | 1199: | eMol16374969       | -6.9                     |
| 1098: | eMol300021201      | -7.0                     | 1149: | eMol36015616       | -7.0                     | 1200: | eMol206963343      | -6.9                     |
| 1099: | eMol300273851      | -7.0                     | 1150: | eMol560309         | -7.0                     | 1201: | eMol207355368      | -6.9                     |
| 1100: | eMol36015642       | -7.0                     | 1151: | eMol15924858       | -6.9                     | 1202: | eMol23246252       | -6.9                     |
| 1101: | eMol45787893       | -7.0                     | 1152: | eMol1683469        | -6.9                     | 1203: | eMol25902478       | -6.9                     |
| 1102: | eMol4735810        | -7.0                     | 1153: | eMol18551390       | -6.9                     | 1204: | eMol27202274       | -6.9                     |
| 1103: | eMol561781         | -7.0                     | 1154: | eMol19076694       | -6.9                     | 1205: | eMol27202906       | -6.9                     |
| 1104: | eMol561985         | -7.0                     | 1155: | eMol20368452       | -6.9                     | 1206: | eMol277677808      | -6.9                     |
| 1105: | eMol6777617        | -7.0                     | 1156: | eMol206910454      | -6.9                     | 1207: | eMol2981967        | -6.9                     |
| 1106: | CHEMBL1554351      | -7.0                     | 1157: | eMol26262090       | -6.9                     | 1208: | eMol4713349        | -6.9                     |
| 1107: | CHEMBL3806234      | -7.0                     | 1158: | eMol26310743       | -6.9                     | 1209: | CHEMBL1405217      | -6.9                     |
| 1108: | CHEMBL3819289      | -7.0                     | 1159: | eMol26313445       | -6.9                     | 1210: | CHEMBL1437240      | -6.9                     |
| 1109: | CHEMBL4091026      | -7.0                     | 1160: | eMol27045535       | -6.9                     | 1211: | CHEMBL3818631      | -6.9                     |
| 1110: | eMol15983252       | -7.0                     | 1161: | eMol27202324       | -6.9                     | 1212: | eMol17205607       | -6.9                     |
| 1111: | eMol16390197       | -7.0                     | 1162: | eMol27202744       | -6.9                     | 1213: | eMol20379434       | -6.9                     |
| 1112: | eMol18588453       | -7.0                     | 1163: | eMol276247956      | -6.9                     | 1214: | eMol206846147      | -6.9                     |
| 1113: | eMol19076492       | -7.0                     | 1164: | eMol2987076        | -6.9                     | 1215: | eMol206907645      | -6.9                     |

Table S1. Continued.

| No.   | Compound Name/Code | Docking Score (kcal/mol) | No.  | Compound Name/Code | Docking Score (kcal/mol) | No.  | Compound Name/Code | Docking Score (kcal/mol) |
|-------|--------------------|--------------------------|------|--------------------|--------------------------|------|--------------------|--------------------------|
| 1216: | eMol23166688       | -6.9                     | 1267 | eMol25962247       | -6.9                     | 1323 | eMol2124007        | -6.9                     |
| 1217: | eMol24430221       | -6.9                     | 1268 | eMol26253980       | -6.9                     | 1324 | eMol2192224        | -6.9                     |
| 1218: | eMol24518467       | -6.9                     | 1269 | eMol27202334       | -6.9                     | 1325 | eMol24100760       | -6.9                     |
| 1219: | eMol24520575       | -6.9                     | 1270 | eMol27202782       | -6.9                     | 1326 | eMol25813397       | -6.9                     |
| 1220: | eMol25770140       | -6.9                     | 1271 | eMol36015106       | -6.9                     | 1327 | eMol25813443       | -6.9                     |
| 1221: | eMol25795727       | -6.9                     | 1272 | eMol681896         | -6.9                     | 1328 | eMol25938613       | -6.9                     |
| 1222: | eMol2588283        | -6.9                     | 1273 | CHEMBL1380757      | -6.9                     | 1329 | eMol26272160       | -6.9                     |
| 1223: | eMol26242020       | -6.9                     | 1274 | CHEMBL1521258      | -6.9                     | 1330 | eMol27187248       | -6.9                     |
| 1224: | eMol26262644       | -6.9                     | 1275 | CHEMBL1597816      | -6.9                     | 1331 | eMol27202392       | -6.9                     |
| 1225: | eMol26316338       | -6.9                     | 1276 | eMol1454668        | -6.9                     | 1332 | eMol27202394       | -6.9                     |
| 1226: | eMol26323441       | -6.9                     | 1277 | eMol20333678       | -6.9                     | 1333 | eMol27202400       | -6.9                     |
| 1227: | eMol26339205       | -6.9                     | 1278 | eMol206964698      | -6.9                     | 1334 | eMol27202794       | -6.9                     |
| 1228: | eMol27202226       | -6.9                     | 1279 | eMol23198915       | -6.9                     | 1335 | eMol27202904       | -6.9                     |
| 1229: | eMol3005040        | -6.9                     | 1280 | eMol24507755       | -6.9                     | 1336 | eMol27670260       | -6.9                     |
| 1230: | eMol32813186       | -6.9                     | 1281 | eMol24525232       | -6.9                     | 1337 | eMol2768992        | -6.9                     |
| 1231: | eMol36015820       | -6.9                     | 1282 | eMol25810165       | -6.9                     | 1338 | eMol31399220       | -6.9                     |
| 1232: | eMol44059508       | -6.9                     | 1283 | eMol25896463       | -6.9                     | 1339 | eMol46445438       | -6.9                     |
| 1233: | eMol4475278        | -6.9                     | 1284 | eMol25903653       | -6.9                     | 1340 | CHEMBL1573403      | -6.9                     |
| 1234: | eMol4482176        | -6.9                     | 1285 | eMol26141674       | -6.9                     | 1341 | CHEMBL1708737      | -6.9                     |
| 1235: | eMol46509915       | -6.9                     | 1286 | eMol26285794       | -6.9                     | 1342 | CHEMBL3804897      | -6.9                     |
| 1236: | eMol4708095        | -6.9                     | 1287 | eMol26322685       | -6.9                     | 1343 | CHEMBL3818915      | -6.9                     |
| 1237: | CHEMBL1376830      | -6.9                     | 1288 | eMol314783893      | -6.9                     | 1344 | eMol1751356        | -6.9                     |
| 1238: | CHEMBL1642185      | -6.9                     | 1289 | eMol316838531      | -6.9                     | 1345 | eMol20369159       | -6.9                     |
| 1239: | CHEMBL3804835      | -6.9                     | 1290 | eMol3458659        | -6.9                     | 1346 | eMol206906676      | -6.9                     |
| 1240: | eMol177234561      | -6.9                     | 1291 | eMol4095805        | -6.9                     | 1347 | eMol206962769      | -6.9                     |
| 1241: | eMol18614804       | -6.9                     | 1292 | eMol43745140       | -6.9                     | 1348 | eMol24535222       | -6.9                     |
| 1242: | eMol18939007       | -6.9                     | 1293 | eMol45560661       | -6.9                     | 1349 | eMol2454468        | -6.9                     |
| 1243: | eMol19076402       | -6.9                     | 1294 | eMol46509911       | -6.9                     | 1350 | eMol25770138       | -6.9                     |
| 1244: | eMol206843418      | -6.9                     | 1295 | eMol4702761        | -6.9                     | 1351 | eMol25816249       | -6.9                     |
| 1245: | eMol24537876       | -6.9                     | 1296 | eMol4729332        | -6.9                     | 1352 | eMol25881264       | -6.9                     |
| 1246: | eMol25829407       | -6.9                     | 1297 | CHEMBL1215800      | -6.9                     | 1353 | eMol26249794       | -6.9                     |
| 1247: | eMol26141694       | -6.9                     | 1298 | CHEMBL3818900      | -6.9                     | 1354 | eMol27202342       | -6.9                     |
| 1248: | eMol26288755       | -6.9                     | 1299 | eMol1170743        | -6.9                     | 1355 | eMol2992544        | -6.9                     |
| 1249: | eMol26296745       | -6.9                     | 1300 | eMol20344947       | -6.9                     | 1356 | eMol36015274       | -6.9                     |
| 1250: | eMol27009455       | -6.9                     | 1301 | eMol206843458      | -6.9                     | 1357 | eMol36015492       | -6.9                     |
| 1251: | eMol27187452       | -6.9                     | 1302 | eMol24518839       | -6.9                     | 1358 | eMol43772496       | -6.9                     |
| 1252: | eMol27202270       | -6.9                     | 1303 | eMol25797913       | -6.9                     | 1359 | eMol935732         | -6.9                     |
| 1253: | eMol300120324      | -6.9                     | 1304 | eMol26276724       | -6.9                     | 1360 | CHEMBL1215718      | -6.8                     |
| 1254: | eMol36016024       | -6.9                     | 1305 | eMol26312476       | -6.9                     | 1361 | CHEMBL1473864      | -6.8                     |
| 1255: | eMol4729129        | -6.9                     | 1306 | eMol26336500       | -6.9                     | 1362 | CHEMBL3805000      | -6.8                     |
| 1256: | eMol588436         | -6.9                     | 1307 | eMol27202204       | -6.9                     | 1363 | CHEMBL3805183      | -6.8                     |
| 1257: | eMol6152648        | -6.9                     | 1308 | eMol27202490       | -6.9                     | 1364 | eMol16352261       | -6.8                     |
| 1258: | CHEMBL1423559      | -6.9                     | 1314 | eMol936008         | -6.9                     | 1365 | eMol1753924        | -6.8                     |
| 1259: | CHEMBL1551465      | -6.9                     | 1315 | eMol97777935       | -6.9                     | 1366 | eMol19076612       | -6.8                     |
| 1260: | CHEMBL3806000      | -6.9                     | 1316 | CHEMBL1365625      | -6.9                     | 1367 | eMol206843434      | -6.8                     |
| 1261: | CHEMBL3818963      | -6.9                     | 1317 | CHEMBL1563292      | -6.9                     | 1368 | eMol206907719      | -6.8                     |
| 1262: | CHEMBL3819529      | -6.9                     | 1318 | CHEMBL3805374      | -6.9                     | 1369 | eMol2390664        | -6.8                     |
| 1263: | eMol16352167       | -6.9                     | 1319 | CHEMBL3819159      | -6.9                     | 1370 | eMol25881326       | -6.8                     |
| 1264: | eMol19031727       | -6.9                     | 1320 | CHEMBL46934        | -6.9                     | 1371 | eMol26196310       | -6.8                     |
| 1265: | eMol20368839       | -6.9                     | 1321 | eMol16352175       | -6.9                     | 1372 | eMol26313588       | -6.8                     |
| 1266: | eMol2087020        | -6.9                     | 1322 | eMol206843438      | -6.9                     | 1373 | eMol26353495       | -6.8                     |

Table S1. *Continued.*

| No.   | Compound Name/Code | Docking Score (kcal/mol) | No.   | Compound Name/Code | Docking Score (kcal/mol) | No.   | Compound Name/Code | Docking Score (kcal/mol) |
|-------|--------------------|--------------------------|-------|--------------------|--------------------------|-------|--------------------|--------------------------|
| 1374: | eMol26773948       | -6.8                     | 1425: | eMol25915192       | -6.8                     | 1476: | eMol27186978       | -6.8                     |
| 1375: | eMol27187362       | -6.8                     | 1426: | eMol26132228       | -6.8                     | 1477: | eMol27202214       | -6.8                     |
| 1376: | eMol27202216       | -6.8                     | 1427: | eMol26275086       | -6.8                     | 1478: | eMol27202316       | -6.8                     |
| 1377: | eMol27202470       | -6.8                     | 1428: | eMol26312734       | -6.8                     | 1479: | eMol27202498       | -6.8                     |
| 1378: | eMol300151404      | -6.8                     | 1429: | eMol26313903       | -6.8                     | 1480: | eMol27202516       | -6.8                     |
| 1379: | eMol32246513       | -6.8                     | 1430: | eMol27202302       | -6.8                     | 1481: | eMol27203792       | -6.8                     |
| 1380: | eMol36015640       | -6.8                     | 1431: | eMol27202420       | -6.8                     | 1482: | eMol28321868       | -6.8                     |
| 1381: | eMol36016150       | -6.8                     | 1432: | eMol27202512       | -6.8                     | 1483: | eMol29955345       | -6.8                     |
| 1382: | eMol43745867       | -6.8                     | 1433: | eMol27202522       | -6.8                     | 1484: | eMol3416565        | -6.8                     |
| 1383: | eMol45585830       | -6.8                     | 1434: | eMol27202796       | -6.8                     | 1485: | eMol45560665       | -6.8                     |
| 1384: | eMol45948876       | -6.8                     | 1435: | eMol27202810       | -6.8                     | 1486: | eMol4559848        | -6.8                     |
| 1385: | eMol48957687       | -6.8                     | 1436: | eMol276221097      | -6.8                     | 1487: | eMol5444783        | -6.8                     |
| 1386: | CHEMBL1574680      | -6.8                     | 1437: | eMol303143674      | -6.8                     | 1488: | eMol579900         | -6.8                     |
| 1387: | CHEMBL2263322      | -6.8                     | 1438: | eMol3052109        | -6.8                     | 1489: | eMol681904         | -6.8                     |
| 1388: | CHEMBL2297666      | -6.8                     | 1439: | eMol4472622        | -6.8                     | 1490: | eMol99063354       | -6.8                     |
| 1389: | CHEMBL3805091      | -6.8                     | 1440: | eMol4701187        | -6.8                     | 1491: | CHEMBL1983712      | -6.8                     |
| 1390: | CHEMBL3805234      | -6.8                     | 1441: | eMol565950         | -6.8                     | 1492: | eMol16351695       | -6.8                     |
| 1391: | CHEMBL3806297      | -6.8                     | 1442: | CHEMBL295884       | -6.8                     | 1493: | eMol1755604        | -6.8                     |
| 1392: | eMol16351581       | -6.8                     | 1443: | CHEMBL3819359      | -6.8                     | 1494: | eMol206843432      | -6.8                     |
| 1393: | eMol16351857       | -6.8                     | 1444: | eMol18809799       | -6.8                     | 1495: | eMol206907070      | -6.8                     |
| 1394: | eMol20379714       | -6.8                     | 1445: | eMol19076600       | -6.8                     | 1496: | eMol24537526       | -6.8                     |
| 1395: | eMol25902666       | -6.8                     | 1446: | eMol207161823      | -6.8                     | 1497: | eMol2464575        | -6.8                     |
| 1396: | eMol26262986       | -6.8                     | 1447: | eMol24518650       | -6.8                     | 1498: | eMol25775761       | -6.8                     |
| 1397: | eMol26299003       | -6.8                     | 1448: | eMol24529894       | -6.8                     | 1499: | eMol25810093       | -6.8                     |
| 1398: | eMol26311192       | -6.8                     | 1449: | eMol24530962       | -6.8                     | 1500: | eMol25813423       | -6.8                     |
| 1399: | eMol26344402       | -6.8                     | 1450: | eMol25828609       | -6.8                     | 1501: | eMol26300679       | -6.8                     |
| 1400: | eMol27045529       | -6.8                     | 1451: | eMol25881336       | -6.8                     | 1502: | eMol27045531       | -6.8                     |
| 1401: | eMol27202284       | -6.8                     | 1452: | eMol26270390       | -6.8                     | 1503: | eMol27202354       | -6.8                     |
| 1402: | eMol27202390       | -6.8                     | 1453: | eMol27187286       | -6.8                     | 1504: | eMol27202508       | -6.8                     |
| 1403: | eMol27202472       | -6.8                     | 1454: | eMol27187438       | -6.8                     | 1505: | eMol27202526       | -6.8                     |
| 1404: | eMol27202488       | -6.8                     | 1455: | eMol27202298       | -6.8                     | 1506: | eMol27202774       | -6.8                     |
| 1405: | eMol27202518       | -6.8                     | 1456: | eMol27202344       | -6.8                     | 1507: | eMol43704541       | -6.8                     |
| 1406: | eMol43789923       | -6.8                     | 1457: | eMol27203752       | -6.8                     | 1508: | eMol4698777        | -6.8                     |
| 1407: | eMol4740690        | -6.8                     | 1458: | eMol300132718      | -6.8                     | 1509: | eMol5445037        | -6.8                     |
| 1408: | eMol5444735        | -6.8                     | 1459: | eMol43474659       | -6.8                     | 1510: | eMol579240         | -6.8                     |
| 1409: | eMol588270         | -6.8                     | 1460: | CHEMBL1472653      | -6.8                     | 1511: | CHEMBL1317703      | -6.8                     |
| 1410: | CHEMBL1214866      | -6.8                     | 1461: | CHEMBL1474371      | -6.8                     | 1512: | CHEMBL1376406      | -6.8                     |
| 1411: | CHEMBL1510504      | -6.8                     | 1462: | CHEMBL1902190      | -6.8                     | 1513: | CHEMBL1501960      | -6.8                     |
| 1412: | CHEMBL1716475      | -6.8                     | 1463: | CHEMBL3417627      | -6.8                     | 1514: | CHEMBL1502049      | -6.8                     |
| 1413: | CHEMBL43701        | -6.8                     | 1464: | eMol13526748       | -6.8                     | 1515: | eMol12904258       | -6.8                     |
| 1414: | CHEMBL594345       | -6.8                     | 1465: | eMol17186560       | -6.8                     | 1516: | eMol1745976        | -6.8                     |
| 1415: | eMol1120278        | -6.8                     | 1466: | eMol18551298       | -6.8                     | 1517: | eMol20347819       | -6.8                     |
| 1416: | eMol11749194       | -6.8                     | 1467: | eMol19076670       | -6.8                     | 1518: | eMol20348534       | -6.8                     |
| 1417: | eMol11764832       | -6.8                     | 1468: | eMol206977589      | -6.8                     | 1519: | eMol20382776       | -6.8                     |
| 1418: | eMol20333666       | -6.8                     | 1469: | eMol206985300      | -6.8                     | 1520: | eMol206904385      | -6.8                     |
| 1419: | eMol20354854       | -6.8                     | 1470: | eMol2236870        | -6.8                     | 1521: | eMol206906244      | -6.8                     |
| 1420: | eMol206910858      | -6.8                     | 1471: | eMol23158354       | -6.8                     | 1522: | eMol24526415       | -6.8                     |
| 1421: | eMol23247689       | -6.8                     | 1472: | eMol24100006       | -6.8                     | 1523: | eMol24545861       | -6.8                     |
| 1422: | eMol24519266       | -6.8                     | 1473: | eMol24518499       | -6.8                     | 1524: | eMol25875519       | -6.8                     |
| 1423: | eMol24540588       | -6.8                     | 1474: | eMol26264896       | -6.8                     | 1525: | eMol26244563       | -6.8                     |
| 1424: | eMol24641150       | -6.8                     | 1475: | eMol27115464       | -6.8                     | 1526: | eMol26259033       | -6.8                     |



Table S1. Continued.

| No.   | Compound Name/Code | Docking Score (kcal/mol) | No.   | Compound Name/Code | Docking Score (kcal/mol) | No.   | Compound Name/Code | Docking Score (kcal/mol) |
|-------|--------------------|--------------------------|-------|--------------------|--------------------------|-------|--------------------|--------------------------|
| 1527: | eMol26312406       | -6.8                     | 1578: | CHEMBL1355953      | -6.8                     | 1629: | eMol43777008       | -6.7                     |
| 1528: | eMol26338914       | -6.8                     | 1579: | CHEMBL4060648      | -6.8                     | 1630: | eMol4535449        | -6.7                     |
| 1529: | eMol27490297       | -6.8                     | 1580: | eMol16407928       | -6.8                     | 1631: | eMol49205494       | -6.7                     |
| 1530: | eMol36015298       | -6.8                     | 1581: | eMol18536845       | -6.8                     | 1632: | eMol5509851        | -6.7                     |
| 1531: | eMol43731438       | -6.8                     | 1582: | eMol19764608       | -6.8                     | 1633: | CHEMBL1357400      | -6.7                     |
| 1532: | eMol5445003        | -6.8                     | 1583: | eMol232769854      | -6.8                     | 1634: | CHEMBL1414779      | -6.7                     |
| 1533: | eMol561553         | -6.8                     | 1584: | eMol23983178       | -6.8                     | 1635: | CHEMBL3806144      | -6.7                     |
| 1534: | eMol561867         | -6.8                     | 1585: | eMol24432101       | -6.8                     | 1636: | eMol1035523        | -6.7                     |
| 1535: | eMol7261106        | -6.8                     | 1586: | eMol25153702       | -6.8                     | 1637: | eMol16379399       | -6.7                     |
| 1536: | eMol7274676        | -6.8                     | 1587: | eMol25816253       | -6.8                     | 1638: | eMol16390191       | -6.7                     |
| 1537: | eMol936252         | -6.8                     | 1588: | eMol25819229       | -6.8                     | 1639: | eMol16856          | -6.7                     |
| 1538: | CHEMBL1399555      | -6.8                     | 1589: | eMol27045413       | -6.8                     | 1640: | eMol18532109       | -6.7                     |
| 1539: | eMol16379069       | -6.8                     | 1590: | eMol27045585       | -6.8                     | 1641: | eMol19076832       | -6.7                     |
| 1540: | eMol16379735       | -6.8                     | 1591: | eMol27202196       | -6.8                     | 1642: | eMol20354735       | -6.7                     |
| 1541: | eMol1676253        | -6.8                     | 1592: | eMol27202326       | -6.8                     | 1643: | eMol206843416      | -6.7                     |
| 1542: | eMol1751618        | -6.8                     | 1593: | eMol27202514       | -6.8                     | 1644: | eMol206847221      | -6.7                     |
| 1543: | eMol20382225       | -6.8                     | 1594: | eMol27202740       | -6.8                     | 1645: | eMol206992993      | -6.7                     |
| 1544: | eMol206977831      | -6.8                     | 1595: | eMol31340346       | -6.8                     | 1646: | eMol20732599       | -6.7                     |
| 1545: | eMol24427974       | -6.8                     | 1596: | eMol4418979        | -6.8                     | 1647: | eMol25782835       | -6.7                     |
| 1546: | eMol24530395       | -6.8                     | 1597: | eMol46526926       | -6.8                     | 1648: | eMol25784119       | -6.7                     |
| 1547: | eMol2480990        | -6.8                     | 1598: | CHEMBL1214798      | -6.7                     | 1649: | eMol25817109       | -6.7                     |
| 1548: | eMol25813405       | -6.8                     | 1599: | CHEMBL416260       | -6.7                     | 1650: | eMol26052954       | -6.7                     |
| 1549: | eMol25903601       | -6.8                     | 1600: | eMol20376367       | -6.7                     | 1651: | eMol26141632       | -6.7                     |
| 1550: | eMol26295370       | -6.8                     | 1601: | eMol20381008       | -6.7                     | 1652: | eMol26267262       | -6.7                     |
| 1551: | eMol26308952       | -6.8                     | 1602: | eMol24453856       | -6.7                     | 1653: | eMol26298841       | -6.7                     |
| 1552: | eMol27045571       | -6.8                     | 1603: | eMol25810169       | -6.7                     | 1654: | eMol27202908       | -6.7                     |
| 1553: | eMol27187238       | -6.8                     | 1604: | eMol25902941       | -6.7                     | 1655: | eMol300135787      | -6.7                     |
| 1554: | eMol27187318       | -6.8                     | 1605: | eMol25937625       | -6.7                     | 1656: | eMol3460427        | -6.7                     |
| 1555: | eMol27187472       | -6.8                     | 1606: | eMol27202266       | -6.7                     | 1657: | eMol36015846       | -6.7                     |
| 1556: | eMol27202764       | -6.8                     | 1607: | eMol27202510       | -6.7                     | 1658: | eMol36016030       | -6.7                     |
| 1557: | eMol27490289       | -6.8                     | 1608: | eMol27202780       | -6.7                     | 1659: | eMol3651760        | -6.7                     |
| 1558: | eMol30104226       | -6.8                     | 1609: | eMol300397022      | -6.7                     | 1660: | eMol42849976       | -6.7                     |
| 1559: | eMol33332787       | -6.8                     | 1610: | eMol317731902      | -6.7                     | 1661: | eMol4709725        | -6.7                     |
| 1560: | eMol36015124       | -6.8                     | 1611: | eMol36015372       | -6.7                     | 1662: | CHEMBL1413460      | -6.7                     |
| 1561: | eMol36015848       | -6.8                     | 1612: | eMol36015814       | -6.7                     | 1663: | CHEMBL1440095      | -6.7                     |
| 1562: | eMol36734201       | -6.8                     | 1613: | eMol42925165       | -6.7                     | 1664: | CHEMBL1595228      | -6.7                     |
| 1563: | eMol46210808       | -6.8                     | 1614: | eMol4717060        | -6.7                     | 1665: | CHEMBL4068913      | -6.7                     |
| 1564: | eMol588384         | -6.8                     | 1615: | eMol5445007        | -6.7                     | 1666: | eMol13785933       | -6.7                     |
| 1565: | eMol935668         | -6.8                     | 1616: | eMol560055         | -6.7                     | 1667: | eMol16352169       | -6.7                     |
| 1566: | CHEMBL1492662      | -6.8                     | 1617: | eMol561535         | -6.7                     | 1668: | eMol1681902        | -6.7                     |
| 1567: | CHEMBL1516504      | -6.8                     | 1618: | eMol562333         | -6.7                     | 1669: | eMol18588437       | -6.7                     |
| 1568: | eMol1125990        | -6.8                     | 1619: | CHEMBL1215798      | -6.7                     | 1670: | eMol18954506       | -6.7                     |
| 1569: | eMol1681774        | -6.8                     | 1620: | CHEMBL1237285      | -6.7                     | 1671: | eMol193764290      | -6.7                     |
| 1570: | eMol206964622      | -6.8                     | 1621: | CHEMBL1601068      | -6.7                     | 1672: | eMol20358311       | -6.7                     |
| 1571: | eMol206980093      | -6.8                     | 1622: | CHEMBL3818685      | -6.7                     | 1673: | eMol208112836      | -6.7                     |
| 1572: | eMol24541186       | -6.8                     | 1623: | eMol1749678        | -6.7                     | 1674: | eMol23154795       | -6.7                     |
| 1573: | eMol25813421       | -6.8                     | 1624: | eMol19076368       | -6.7                     | 1675: | eMol25784517       | -6.7                     |
| 1574: | eMol25959987       | -6.8                     | 1625: | eMol20358115       | -6.7                     | 1676: | eMol25963297       | -6.7                     |
| 1575: | eMol27202278       | -6.8                     | 1626: | eMol25810017       | -6.7                     | 1677: | eMol26314205       | -6.7                     |
| 1576: | eMol27202356       | -6.8                     | 1627: | eMol27187280       | -6.7                     | 1678: | eMol27485970       | -6.7                     |
| 1577: | eMol3581771        | -6.8                     | 1628: | eMol27202414       | -6.7                     | 1679: | eMol36015368       | -6.7                     |
| 1548: | eMol25813405       | -6.8                     | 1599: | CHEMBL416260       | -6.7                     | 1650: | eMol26052954       | -6.7                     |

Table S1. Continued.

| No.  | Compound Name/Code | Docking Score (kcal/mol) | No.  | Compound Name/Code | Docking Score (kcal/mol) | No.  | Compound Name/Code | Docking Score (kcal/mol) |
|------|--------------------|--------------------------|------|--------------------|--------------------------|------|--------------------|--------------------------|
| 1680 | eMol36015832       | -6.7                     | 1731 | eMol36015102       | -6.7                     | 1782 | eMol300252505      | -6.7                     |
| 1681 | eMol4730653        | -6.7                     | 1732 | eMol36015520       | -6.7                     | 1783 | eMol3494756        | -6.7                     |
| 1682 | eMol5444865        | -6.7                     | 1733 | eMol36016040       | -6.7                     | 1784 | eMol36913016       | -6.7                     |
| 1683 | eMol561447         | -6.7                     | 1734 | eMol36734203       | -6.7                     | 1785 | eMol43743366       | -6.7                     |
| 1684 | eMol624281         | -6.7                     | 1735 | eMol45932361       | -6.7                     | 1786 | eMol4710992        | -6.7                     |
| 1685 | eMol679752         | -6.7                     | 1736 | eMol560185         | -6.7                     | 1787 | eMol4737014        | -6.7                     |
| 1686 | CHEMBL1214790      | -6.7                     | 1737 | eMol935816         | -6.7                     | 1788 | eMol53754573       | -6.7                     |
| 1687 | CHEMBL1476683      | -6.7                     | 1738 | CHEMBL1214797      | -6.7                     | 1789 | eMol54826500       | -6.7                     |
| 1688 | CHEMBL1866012      | -6.7                     | 1739 | CHEMBL1427466      | -6.7                     | 1790 | eMol565990         | -6.7                     |
| 1689 | CHEMBL1872793      | -6.7                     | 1740 | CHEMBL2134755      | -6.7                     | 1791 | CHEMBL1593176      | -6.7                     |
| 1690 | CHEMBL3819643      | -6.7                     | 1741 | CHEMBL301308       | -6.7                     | 1792 | CHEMBL1870195      | -6.7                     |
| 1691 | CHEMBL4085469      | -6.7                     | 1742 | eMol1415360        | -6.7                     | 1793 | CHEMBL37653        | -6.7                     |
| 1692 | eMol1444423        | -6.7                     | 1743 | eMol16352263       | -6.7                     | 1794 | CHEMBL38176        | -6.7                     |
| 1693 | eMol16351865       | -6.7                     | 1744 | eMol16390485       | -6.7                     | 1795 | eMol1119962        | -6.7                     |
| 1694 | eMol16351871       | -6.7                     | 1745 | eMol16805743       | -6.7                     | 1796 | eMol11970394       | -6.7                     |
| 1695 | eMol16370299       | -6.7                     | 1746 | eMol18551296       | -6.7                     | 1797 | eMol1266025        | -6.7                     |
| 1696 | eMol18550690       | -6.7                     | 1747 | eMol18879479       | -6.7                     | 1798 | eMol16351573       | -6.7                     |
| 1697 | eMol18780688       | -6.7                     | 1748 | eMol20337454       | -6.7                     | 1799 | eMol16758472       | -6.7                     |
| 1698 | eMol206924376      | -6.7                     | 1749 | eMol20382098       | -6.7                     | 1800 | eMol206910448      | -6.7                     |
| 1699 | eMol2180510        | -6.7                     | 1750 | eMol23238997       | -6.7                     | 1801 | eMol25813407       | -6.7                     |
| 1700 | eMol24555667       | -6.7                     | 1751 | eMol25901997       | -6.7                     | 1802 | eMol25896465       | -6.7                     |
| 1701 | eMol25815831       | -6.7                     | 1752 | eMol26281046       | -6.7                     | 1803 | eMol25942258       | -6.7                     |
| 1702 | eMol25902460       | -6.7                     | 1753 | eMol26337174       | -6.7                     | 1804 | eMol26141624       | -6.7                     |
| 1703 | eMol26141660       | -6.7                     | 1754 | eMol27187474       | -6.7                     | 1805 | eMol27187228       | -6.7                     |
| 1704 | eMol26293000       | -6.7                     | 1755 | eMol27202202       | -6.7                     | 1806 | eMol27202330       | -6.7                     |
| 1705 | eMol26310199       | -6.7                     | 1756 | eMol27202456       | -6.7                     | 1807 | eMol27202746       | -6.7                     |
| 1706 | eMol26319897       | -6.7                     | 1757 | eMol27202492       | -6.7                     | 1808 | eMol27202962       | -6.7                     |
| 1707 | eMol26344183       | -6.7                     | 1758 | eMol30341805       | -6.7                     | 1809 | eMol300229303      | -6.7                     |
| 1708 | eMol27115470       | -6.7                     | 1759 | eMol33346437       | -6.7                     | 1810 | eMol3004720        | -6.7                     |
| 1709 | eMol27202440       | -6.7                     | 1760 | eMol36734043       | -6.7                     | 1811 | eMol3381941        | -6.7                     |
| 1710 | eMol27202800       | -6.7                     | 1761 | eMol579396         | -6.7                     | 1812 | eMol3457653        | -6.7                     |
| 1711 | eMol27202922       | -6.7                     | 1762 | eMol7294872        | -6.7                     | 1813 | eMol43751233       | -6.7                     |
| 1712 | eMol300145258      | -6.7                     | 1763 | eMol98023415       | -6.7                     | 1814 | eMol4696216        | -6.7                     |
| 1713 | eMol32246803       | -6.7                     | 1764 | CHEMBL1214791      | -6.7                     | 1815 | eMol560307         | -6.7                     |
| 1714 | eMol36016026       | -6.7                     | 1765 | CHEMBL3805351      | -6.7                     | 1816 | eMol7635460        | -6.7                     |
| 1715 | eMol7271648        | -6.7                     | 1766 | CHEMBL4075913      | -6.7                     | 1817 | CHEMBL3805445      | -6.7                     |
| 1716 | eMol956529         | -6.7                     | 1767 | eMol16352273       | -6.7                     | 1818 | eMol14855102       | -6.7                     |
| 1717 | CHEMBL1449683      | -6.7                     | 1768 | eMol19076340       | -6.7                     | 1819 | eMol15245309       | -6.7                     |
| 1718 | CHEMBL301330       | -6.7                     | 1769 | eMol20364228       | -6.7                     | 1820 | eMol18808193       | -6.7                     |
| 1719 | CHEMBL3819609      | -6.7                     | 1770 | eMol20374086       | -6.7                     | 1821 | eMol206977399      | -6.7                     |
| 1720 | eMol1458294        | -6.7                     | 1771 | eMol20382812       | -6.7                     | 1822 | eMol207368461      | -6.7                     |
| 1721 | eMol19076334       | -6.7                     | 1772 | eMol23155886       | -6.7                     | 1823 | eMol2213417        | -6.7                     |
| 1722 | eMol206843414      | -6.7                     | 1773 | eMol23244991       | -6.7                     | 1824 | eMol24531994       | -6.7                     |
| 1723 | eMol26141650       | -6.7                     | 1774 | eMol24427994       | -6.7                     | 1825 | eMol25910177       | -6.7                     |
| 1724 | eMol26326538       | -6.7                     | 1775 | eMol25881344       | -6.7                     | 1826 | eMol26264081       | -6.7                     |
| 1725 | eMol27187404       | -6.7                     | 1776 | eMol26141340       | -6.7                     | 1827 | eMol26284998       | -6.7                     |
| 1726 | eMol27202292       | -6.7                     | 1777 | eMol26141622       | -6.7                     | 1828 | eMol26309549       | -6.7                     |
| 1727 | eMol27202364       | -6.7                     | 1778 | eMol26248577       | -6.7                     | 1829 | eMol26312290       | -6.7                     |
| 1728 | eMol27202408       | -6.7                     | 1779 | eMol27187214       | -6.7                     | 1830 | eMol26325538       | -6.7                     |
| 1729 | eMol32392848       | -6.7                     | 1780 | eMol27202308       | -6.7                     | 1831 | eMol26779126       | -6.7                     |
| 1730 | eMol3401751        | -6.7                     | 1781 | eMol276247938      | -6.7                     | 1832 | eMol27187346       | -6.7                     |
| 1701 | eMol25815831       | -6.7                     | 1752 | eMol26281046       | -6.7                     | 1803 | eMol25942258       | -6.7                     |

Table S1. Continued.

| No.   | Compound Name/Code | Docking Score (kcal/mol) | No.  | Compound Name/Code | Docking Score (kcal/mol) | No.  | Compound Name/Code | Docking Score (kcal/mol) |
|-------|--------------------|--------------------------|------|--------------------|--------------------------|------|--------------------|--------------------------|
| 1833: | eMol30721735       | -6.7                     | 1884 | eMol560181         | -6.6                     | 1935 | eMol7269426        | -6.6                     |
| 1834: | eMol43754815       | -6.7                     | 1885 | eMol7261256        | -6.6                     | 1936 | eMol96989666       | -6.6                     |
| 1835: | eMol4557017        | -6.7                     | 1886 | CHEMBL1581170      | -6.6                     | 1937 | CHEMBL1547176      | -6.6                     |
| 1836: | eMol46541996       | -6.7                     | 1887 | CHEMBL1984743      | -6.6                     | 1938 | CHEMBL1889180      | -6.6                     |
| 1837: | eMol562393         | -6.7                     | 1888 | CHEMBL3818386      | -6.6                     | 1939 | CHEMBL2355688      | -6.6                     |
| 1838: | eMol6157526        | -6.7                     | 1889 | eMol11879378       | -6.6                     | 1940 | CHEMBL3805622      | -6.6                     |
| 1839: | eMol7268112        | -6.7                     | 1890 | eMol16352159       | -6.6                     | 1941 | CHEMBL3819491      | -6.6                     |
| 1840: | eMol956427         | -6.7                     | 1891 | eMol16352189       | -6.6                     | 1942 | eMol11663659       | -6.6                     |
| 1841: | CHEMBL1516226      | -6.6                     | 1892 | eMol19031808       | -6.6                     | 1943 | eMol20360019       | -6.6                     |
| 1842: | CHEMBL1601841      | -6.6                     | 1893 | eMol19076342       | -6.6                     | 1944 | eMol20360818       | -6.6                     |
| 1843: | CHEMBL1903920      | -6.6                     | 1894 | eMol19764926       | -6.6                     | 1945 | eMol206962178      | -6.6                     |
| 1844: | CHEMBL3818857      | -6.6                     | 1895 | eMol20382919       | -6.6                     | 1946 | eMol206978287      | -6.6                     |
| 1845: | eMol16351859       | -6.6                     | 1896 | eMol24107121       | -6.6                     | 1947 | eMol206987243      | -6.6                     |
| 1846: | eMol16351867       | -6.6                     | 1897 | eMol24547204       | -6.6                     | 1948 | eMol2409707        | -6.6                     |
| 1847: | eMol2423428        | -6.6                     | 1898 | eMol2488724        | -6.6                     | 1949 | eMol25961959       | -6.6                     |
| 1848: | eMol24545576       | -6.6                     | 1899 | eMol25963261       | -6.6                     | 1950 | eMol27202412       | -6.6                     |
| 1849: | eMol25775755       | -6.6                     | 1900 | eMol27202314       | -6.6                     | 1951 | eMol27202484       | -6.6                     |
| 1850: | eMol25810167       | -6.6                     | 1901 | eMol27202500       | -6.6                     | 1952 | eMol27202814       | -6.6                     |
| 1851: | eMol25813411       | -6.6                     | 1902 | eMol27202528       | -6.6                     | 1953 | eMol27202844       | -6.6                     |
| 1852: | eMol25967144       | -6.6                     | 1903 | eMol27202892       | -6.6                     | 1954 | eMol29565470       | -6.6                     |
| 1853: | eMol27045525       | -6.6                     | 1904 | eMol3443403        | -6.6                     | 1955 | eMol5509853        | -6.6                     |
| 1854: | eMol27187442       | -6.6                     | 1905 | eMol36898008       | -6.6                     | 1956 | eMol5538254        | -6.6                     |
| 1855: | eMol27202206       | -6.6                     | 1906 | eMol565896         | -6.6                     | 1957 | eMol560071         | -6.6                     |
| 1856: | eMol27202340       | -6.6                     | 1907 | eMol7701728        | -6.6                     | 1958 | eMol581330         | -6.6                     |
| 1857: | eMol27202770       | -6.6                     | 1908 | CHEMBL1214867      | -6.6                     | 1959 | eMol7260196        | -6.6                     |
| 1858: | eMol30104210       | -6.6                     | 1909 | CHEMBL1418314      | -6.6                     | 1960 | eMol936014         | -6.6                     |
| 1859: | eMol43771200       | -6.6                     | 1910 | CHEMBL1516180      | -6.6                     | 1961 | eMol98980408       | -6.6                     |
| 1860: | eMol45951607       | -6.6                     | 1911 | eMol11687945       | -6.6                     | 1962 | eMol99520559       | -6.6                     |
| 1861: | eMol50575071       | -6.6                     | 1912 | eMol16351575       | -6.6                     | 1963 | CHEMBL1490844      | -6.6                     |
| 1862: | eMol565972         | -6.6                     | 1913 | eMol16407954       | -6.6                     | 1964 | CHEMBL1880647      | -6.6                     |
| 1863: | eMol579916         | -6.6                     | 1914 | eMol206843424      | -6.6                     | 1965 | eMol16390181       | -6.6                     |
| 1864: | CHEMBL1402158      | -6.6                     | 1915 | eMol206978315      | -6.6                     | 1966 | eMol17193486       | -6.6                     |
| 1865: | CHEMBL1903268      | -6.6                     | 1916 | eMol206993297      | -6.6                     | 1967 | eMol18900038       | -6.6                     |
| 1866: | CHEMBL297579       | -6.6                     | 1917 | eMol24520907       | -6.6                     | 1968 | eMol206904367      | -6.6                     |
| 1867: | eMol13734651       | -6.6                     | 1918 | eMol24526901       | -6.6                     | 1969 | eMol25782831       | -6.6                     |
| 1868: | eMol16379439       | -6.6                     | 1919 | eMol25797961       | -6.6                     | 1970 | eMol25829419       | -6.6                     |
| 1869: | eMol20381366       | -6.6                     | 1920 | eMol25908587       | -6.6                     | 1971 | eMol25962071       | -6.6                     |
| 1870: | eMol20383035       | -6.6                     | 1921 | eMol27202386       | -6.6                     | 1972 | eMol26260063       | -6.6                     |
| 1871: | eMol206843410      | -6.6                     | 1922 | eMol27202566       | -6.6                     | 1973 | eMol26340085       | -6.6                     |
| 1872: | eMol206970436      | -6.6                     | 1923 | eMol27202788       | -6.6                     | 1974 | eMol26594563       | -6.6                     |
| 1873: | eMol24427888       | -6.6                     | 1924 | eMol27202798       | -6.6                     | 1975 | eMol27045277       | -6.6                     |
| 1874: | eMol25771176       | -6.6                     | 1925 | eMol27490345       | -6.6                     | 1976 | eMol27187316       | -6.6                     |
| 1875: | eMol25926749       | -6.6                     | 1926 | eMol3315989        | -6.6                     | 1977 | eMol27202966       | -6.6                     |
| 1876: | eMol26243624       | -6.6                     | 1927 | eMol36015342       | -6.6                     | 1978 | eMol3455505        | -6.6                     |
| 1877: | eMol26288251       | -6.6                     | 1928 | eMol43744872       | -6.6                     | 1979 | eMol43732496       | -6.6                     |
| 1878: | eMol27202352       | -6.6                     | 1929 | eMol45705372       | -6.6                     | 1980 | CHEMBL1473628      | -6.6                     |
| 1879: | eMol27202802       | -6.6                     | 1930 | eMol46210816       | -6.6                     | 1981 | CHEMBL3818892      | -6.6                     |
| 1880: | eMol2992494        | -6.6                     | 1931 | eMol46370141       | -6.6                     | 1982 | CHEMBL3914501      | -6.6                     |
| 1881: | eMol3252720        | -6.6                     | 1932 | eMol4703775        | -6.6                     | 1983 | eMol16351607       | -6.6                     |
| 1882: | eMol3670123        | -6.6                     | 1933 | eMol4718173        | -6.6                     | 1984 | eMol16352163       | -6.6                     |
| 1883: | eMol5444963        | -6.6                     | 1934 | eMol6263469        | -6.6                     | 1985 | eMol16786052       | -6.6                     |
| 1854: | eMol27187442       | -6.6                     | 1905 | eMol36898008       | -6.6                     | 1956 | eMol5538254        | -6.6                     |

Table S1. Continued.

| No.   | Compound Name/Code | Docking Score (kcal/mol) | No.  | Compound Name/Code | Docking Score (kcal/mol) | No.  | Compound Name/Code | Docking Score (kcal/mol) |
|-------|--------------------|--------------------------|------|--------------------|--------------------------|------|--------------------|--------------------------|
| 1986: | eMol19076700       | -6.6                     | 2016 | eMol27202426       | -6.6                     | 2067 | eMol1237695        | -6.5                     |
| 1987: | eMol206843365      | -6.6                     | 2017 | eMol27202502       | -6.6                     | 2068 | eMol18536433       | -6.5                     |
| 1988: | eMol2386034        | -6.6                     | 2018 | eMol30104206       | -6.6                     | 2069 | eMol19076362       | -6.5                     |
| 1989: | eMol24519974       | -6.6                     | 2019 | eMol36016676       | -6.6                     | 2070 | eMol20380980       | -6.5                     |
| 1990: | eMol26339810       | -6.6                     | 2020 | eMol45645578       | -6.6                     | 2071 | eMol23982014       | -6.5                     |
| 1991: | eMol27202210       | -6.6                     | 2021 | eMol4567983        | -6.6                     | 2072 | eMol2513700        | -6.5                     |
| 1992: | eMol27202978       | -6.6                     | 2022 | eMol46210768       | -6.6                     | 2073 | eMol2519315        | -6.5                     |
| 1993: | eMol2889094        | -6.6                     | 2023 | eMol4727438        | -6.6                     | 2074 | eMol25813413       | -6.5                     |
| 1994: | eMol289941482      | -6.6                     | 2024 | eMol6467547        | -6.6                     | 2075 | eMol25881262       | -6.5                     |
| 1995: | eMol2993559        | -6.6                     | 2025 | eMol7259996        | -6.6                     | 2076 | eMol26350874       | -6.5                     |
| 1996: | eMol3459687        | -6.6                     | 2026 | eMol7266104        | -6.6                     | 2077 | eMol27045523       | -6.5                     |
| 1997: | eMol36015734       | -6.6                     | 2027 | CHEMBL1475827      | -6.6                     | 2078 | eMol27187266       | -6.5                     |
| 1998: | eMol36016022       | -6.6                     | 2028 | CHEMBL249301       | -6.6                     | 2079 | eMol27202200       | -6.5                     |
| 1999: | eMol44057501       | -6.6                     | 2029 | CHEMBL297442       | -6.6                     | 2080 | eMol27202530       | -6.5                     |
| 2000: | eMol561659         | -6.6                     | 2030 | eMol16352161       | -6.6                     | 2081 | eMol36015714       | -6.5                     |
| 2001: | CHEMBL1513163      | -6.6                     | 2031 | eMol1834904        | -6.6                     | 2082 | eMol36015812       | -6.5                     |
| 2002: | CHEMBL1610757      | -6.6                     | 2032 | eMol18551350       | -6.6                     | 2083 | eMol36016036       | -6.5                     |
| 2003: | CHEMBL3805404      | -6.6                     | 2033 | eMol206904341      | -6.6                     | 2084 | eMol36016052       | -6.5                     |
| 2004: | eMol1032463        | -6.6                     | 2034 | eMol206906698      | -6.6                     | 2085 | eMol36733911       | -6.5                     |
| 2005: | eMol16351585       | -6.6                     | 2035 | eMol206992362      | -6.6                     | 2086 | eMol36898044       | -6.5                     |
| 2006: | eMol16351605       | -6.6                     | 2036 | eMol25825123       | -6.6                     | 2087 | eMol45803170       | -6.5                     |
| 2007: | eMol206961858      | -6.6                     | 2037 | eMol25966292       | -6.6                     | 2088 | eMol561977         | -6.5                     |
| 2008: | eMol206985304      | -6.6                     | 2038 | eMol26263883       | -6.6                     | 2089 | eMol566052         | -6.5                     |
| 2009: | eMol207355363      | -6.6                     | 2039 | eMol26337698       | -6.6                     | 2090 | eMol956197         | -6.5                     |
| 2010: | eMol25784123       | -6.6                     | 2040 | eMol317395728      | -6.6                     | 2091 | CHEMBL111006       | -6.5                     |
| 2011: | eMol25813409       | -6.6                     | 2041 | eMol33346431       | -6.6                     | 2092 | CHEMBL118001       | -6.5                     |
| 2012: | eMol25813427       | -6.6                     | 2042 | eMol44218497       | -6.6                     | 2093 | CHEMBL1895705      | -6.5                     |
| 2013: | eMol26195582       | -6.6                     | 2043 | eMol4727713        | -6.6                     | 2094 | CHEMBL3935405      | -6.5                     |
| 2014: | eMol27187274       | -6.6                     | 2044 | eMol4730084        | -6.6                     | 2095 | CHEMBL561127       | -6.5                     |
| 1994: | eMol289941482      | -6.6                     | 2045 | eMol587920         | -6.6                     | 2096 | eMol16352191       | -6.5                     |
| 1995: | eMol2993559        | -6.6                     | 2046 | eMol956475         | -6.6                     | 2097 | eMol16759756       | -6.5                     |
| 1996: | eMol3459687        | -6.6                     | 2047 | CHEMBL3818297      | -6.6                     | 2098 | eMol19031731       | -6.5                     |
| 1997: | eMol36015734       | -6.6                     | 2048 | eMol19351378       | -6.6                     | 2099 | eMol206910196      | -6.5                     |
| 1998: | eMol36016022       | -6.6                     | 2049 | eMol206962232      | -6.6                     | 2100 | eMol206969636      | -6.5                     |
| 1999: | eMol44057501       | -6.6                     | 2050 | eMol27038267       | -6.6                     | 2101 | eMol207116159      | -6.5                     |
| 2000: | eMol561659         | -6.6                     | 2051 | eMol27045559       | -6.6                     | 2102 | eMol23245699       | -6.5                     |
| 2001: | CHEMBL1513163      | -6.6                     | 2052 | eMol27202286       | -6.6                     | 2103 | eMol25896431       | -6.5                     |
| 2002: | CHEMBL1610757      | -6.6                     | 2053 | eMol27202462       | -6.6                     | 2104 | eMol26195584       | -6.5                     |
| 2003: | CHEMBL3805404      | -6.6                     | 2054 | eMol29642547       | -6.6                     | 2105 | eMol27187386       | -6.5                     |
| 2004: | eMol1032463        | -6.6                     | 2055 | eMol3172250        | -6.6                     | 2106 | eMol27187470       | -6.5                     |
| 2005: | eMol16351585       | -6.6                     | 2056 | eMol36010133       | -6.6                     | 2107 | eMol27509217       | -6.5                     |
| 2006: | eMol16351605       | -6.6                     | 2057 | eMol36016622       | -6.6                     | 2108 | eMol2881132        | -6.5                     |
| 2007: | eMol206961858      | -6.6                     | 2058 | eMol43772416       | -6.6                     | 2109 | eMol300020871      | -6.5                     |
| 2008: | eMol206985304      | -6.6                     | 2059 | eMol46210820       | -6.6                     | 2110 | eMol43743380       | -6.5                     |
| 2009: | eMol207355363      | -6.6                     | 2060 | eMol561519         | -6.6                     | 2111 | eMol43995461       | -6.5                     |
| 2010: | eMol25784123       | -6.6                     | 2061 | CHEMBL1475371      | -6.5                     | 2112 | eMol4706823        | -6.5                     |
| 2011: | eMol25813409       | -6.6                     | 2062 | CHEMBL245490       | -6.5                     | 2113 | eMol4716299        | -6.5                     |
| 2012: | eMol25813427       | -6.6                     | 2063 | CHEMBL3417654      | -6.5                     | 2114 | eMol4728654        | -6.5                     |
| 2013: | eMol26195582       | -6.6                     | 2064 | CHEMBL53995        | -6.5                     | 2115 | eMol560189         | -6.5                     |
| 2014: | eMol27187274       | -6.6                     | 2065 | CHEMBL565080       | -6.5                     | 2116 | eMol581246         | -6.5                     |
| 2015: | eMol27202328       | -6.6                     | 2066 | eMol1165995        | -6.5                     | 2117 | eMol639662         | -6.5                     |
| 2007: | eMol206961858      | -6.6                     | 2037 | eMol25966292       | -6.6                     | 2088 | eMol561977         | -6.5                     |

Table S1. *Continued.*

| No.   | Compound Name/Code | Docking Score (kcal/mol) | No.   | Compound Name/Code | Docking Score (kcal/mol) | No.   | Compound Name/Code | Docking Score (kcal/mol) |
|-------|--------------------|--------------------------|-------|--------------------|--------------------------|-------|--------------------|--------------------------|
| 2118: | eMol8547353        | -6.5                     | 2169: | CHEMBL1373044      | -6.5                     | 2220: | eMol5444931        | -6.5                     |
| 2119: | CHEMBL300024       | -6.5                     | 2170: | CHEMBL1882018      | -6.5                     | 2221: | eMol7281428        | -6.5                     |
| 2120: | CHEMBL314385       | -6.5                     | 2171: | CHEMBL4076110      | -6.5                     | 2222: | CHEMBL1310211      | -6.5                     |
| 2121: | eMol11758466       | -6.5                     | 2172: | eMol1120544        | -6.5                     | 2223: | CHEMBL1434827      | -6.5                     |
| 2122: | eMol16351577       | -6.5                     | 2173: | eMol1386911        | -6.5                     | 2224: | CHEMBL1592831      | -6.5                     |
| 2123: | eMol177539683      | -6.5                     | 2174: | eMol16352171       | -6.5                     | 2225: | CHEMBL298576       | -6.5                     |
| 2124: | eMol206843485      | -6.5                     | 2175: | eMol24520475       | -6.5                     | 2226: | CHEMBL3817977      | -6.5                     |
| 2125: | eMol22370932       | -6.5                     | 2176: | eMol25813401       | -6.5                     | 2227: | eMol11371397       | -6.5                     |
| 2126: | eMol23236781       | -6.5                     | 2177: | eMol25813415       | -6.5                     | 2228: | eMol13502306       | -6.5                     |
| 2127: | eMol24152474       | -6.5                     | 2178: | eMol25813435       | -6.5                     | 2229: | eMol16352257       | -6.5                     |
| 2128: | eMol24524791       | -6.5                     | 2179: | eMol25881328       | -6.5                     | 2230: | eMol18823378       | -6.5                     |
| 2129: | eMol25813431       | -6.5                     | 2180: | eMol26286432       | -6.5                     | 2231: | eMol20375967       | -6.5                     |
| 2130: | eMol25881340       | -6.5                     | 2181: | eMol27187342       | -6.5                     | 2232: | eMol206906624      | -6.5                     |
| 2131: | eMol25962331       | -6.5                     | 2182: | eMol27341385       | -6.5                     | 2233: | eMol206977577      | -6.5                     |
| 2132: | eMol26184916       | -6.5                     | 2183: | eMol30185530       | -6.5                     | 2234: | eMol206994514      | -6.5                     |
| 2133: | eMol27202430       | -6.5                     | 2184: | eMol3063037        | -6.5                     | 2235: | eMol25807807       | -6.5                     |
| 2134: | eMol3204435        | -6.5                     | 2185: | eMol3501366        | -6.5                     | 2236: | eMol25810159       | -6.5                     |
| 2135: | eMol36733941       | -6.5                     | 2186: | eMol36015620       | -6.5                     | 2237: | eMol27187032       | -6.5                     |
| 2136: | eMol36734171       | -6.5                     | 2187: | eMol36733903       | -6.5                     | 2238: | eMol3206345        | -6.5                     |
| 2137: | eMol5444999        | -6.5                     | 2188: | eMol44519141       | -6.5                     | 2239: | eMol36013033       | -6.5                     |
| 2138: | CHEMBL1415081      | -6.5                     | 2189: | eMol4726940        | -6.5                     | 2240: | eMol36015822       | -6.5                     |
| 2139: | CHEMBL1514215      | -6.5                     | 2190: | eMol5538220        | -6.5                     | 2241: | eMol42762132       | -6.5                     |
| 2140: | CHEMBL1903537      | -6.5                     | 2191: | eMol5538898        | -6.5                     | 2242: | eMol5444995        | -6.5                     |
| 2141: | CHEMBL563538       | -6.5                     | 2192: | eMol6869460        | -6.5                     | 2243: | CHEMBL301313       | -6.5                     |
| 2142: | eMol11903726       | -6.5                     | 2193: | eMol98690075       | -6.5                     | 2244: | eMol1035485        | -6.5                     |
| 2143: | eMol16373087       | -6.5                     | 2194: | CHEMBL113883       | -6.5                     | 2245: | eMol18879511       | -6.5                     |
| 2144: | eMol16390221       | -6.5                     | 2195: | CHEMBL1443220      | -6.5                     | 2246: | eMol206843430      | -6.5                     |
| 2145: | eMol16407934       | -6.5                     | 2196: | CHEMBL1497333      | -6.5                     | 2247: | eMol206924378      | -6.5                     |
| 2146: | eMol1679112        | -6.5                     | 2197: | CHEMBL260456       | -6.5                     | 2248: | eMol206969606      | -6.5                     |
| 2147: | eMol19382530       | -6.5                     | 2198: | CHEMBL51165        | -6.5                     | 2249: | eMol22375727       | -6.5                     |
| 2148: | eMol2001733        | -6.5                     | 2199: | CHEMBL53479        | -6.5                     | 2250: | eMol26141688       | -6.5                     |
| 2149: | eMol20344244       | -6.5                     | 2200: | eMol16407962       | -6.5                     | 2251: | eMol26268026       | -6.5                     |
| 2150: | eMol206978824      | -6.5                     | 2201: | eMol1673994        | -6.5                     | 2252: | eMol27187466       | -6.5                     |
| 2151: | eMol23982214       | -6.5                     | 2202: | eMol20382826       | -6.5                     | 2253: | eMol300261713      | -6.5                     |
| 2152: | eMol24427912       | -6.5                     | 2203: | eMol206843412      | -6.5                     | 2254: | eMol3327781        | -6.5                     |
| 2153: | eMol25844601       | -6.5                     | 2204: | eMol25810097       | -6.5                     | 2255: | eMol3485283        | -6.5                     |
| 2154: | eMol26242028       | -6.5                     | 2205: | eMol25813425       | -6.5                     | 2256: | eMol3517784        | -6.5                     |
| 2155: | eMol26248549       | -6.5                     | 2206: | eMol25817107       | -6.5                     | 2257: | eMol44603525       | -6.5                     |
| 2156: | eMol27045467       | -6.5                     | 2207: | eMol25957029       | -6.5                     | 2258: | eMol45787891       | -6.5                     |
| 2157: | eMol27187234       | -6.5                     | 2208: | eMol26254010       | -6.5                     | 2259: | eMol4727426        | -6.5                     |
| 2158: | eMol27202310       | -6.5                     | 2209: | eMol26291793       | -6.5                     | 2260: | CHEMBL185809       | -6.5                     |
| 2159: | eMol3087147        | -6.5                     | 2210: | eMol27045479       | -6.5                     | 2261: | CHEMBL3805880      | -6.5                     |
| 2160: | eMol36636763       | -6.5                     | 2211: | eMol27045553       | -6.5                     | 2262: | eMol11070727       | -6.5                     |
| 2161: | eMol4538051        | -6.5                     | 2212: | eMol27045583       | -6.5                     | 2263: | eMol1149891        | -6.5                     |
| 2162: | eMol45930049       | -6.5                     | 2213: | eMol27202416       | -6.5                     | 2264: | eMol11816884       | -6.5                     |
| 2163: | eMol5444633        | -6.5                     | 2214: | eMol2991923        | -6.5                     | 2265: | eMol16351681       | -6.5                     |
| 2164: | eMol566608         | -6.5                     | 2215: | eMol36734029       | -6.5                     | 2266: | eMol18931802       | -6.5                     |
| 2165: | eMol581404         | -6.5                     | 2216: | eMol42927497       | -6.5                     | 2267: | eMol206963325      | -6.5                     |
| 2166: | eMol6514347        | -6.5                     | 2217: | eMol45904698       | -6.5                     | 2268: | eMol26349730       | -6.5                     |
| 2167: | eMol7291156        | -6.5                     | 2218: | eMol4718135        | -6.5                     | 2269: | eMol27187320       | -6.5                     |
| 2168: | CHEMBL1323375      | -6.5                     | 2219: | eMol4727659        | -6.5                     | 2270: | eMol27202424       | -6.5                     |
| 2139: | CHEMBL1514215      | -6.5                     | 2190: | eMol5538220        | -6.5                     | 2241: | eMol42762132       | -6.5                     |

Table S1. Continued.

| No.   | Compound Name/Code | Docking Score (kcal/mol) | No.  | Compound Name/Code | Docking Score (kcal/mol) | No.  | Compound Name/Code | Docking Score (kcal/mol) |
|-------|--------------------|--------------------------|------|--------------------|--------------------------|------|--------------------|--------------------------|
| 2271: | eMol27202446       | -6.5                     | 2322 | eMol15301394       | -6.4                     | 2373 | eMol3255850        | -6.4                     |
| 2272: | eMol27202486       | -6.5                     | 2323 | eMol1679964        | -6.4                     | 2374 | eMol32661616       | -6.4                     |
| 2273: | eMol27202536       | -6.5                     | 2324 | eMol206962711      | -6.4                     | 2375 | eMol43995617       | -6.4                     |
| 2274: | eMol29968406       | -6.5                     | 2325 | eMol24306794       | -6.4                     | 2376 | eMol46210770       | -6.4                     |
| 2275: | eMol300149359      | -6.5                     | 2326 | eMol25810105       | -6.4                     | 2377 | eMol7266174        | -6.4                     |
| 2276: | eMol33338072       | -6.5                     | 2327 | eMol26299887       | -6.4                     | 2378 | eMol9815169        | -6.4                     |
| 2277: | eMol35387961       | -6.5                     | 2328 | eMol27187282       | -6.4                     | 2379 | CHEMBL3417641      | -6.4                     |
| 2278: | eMol36010145       | -6.5                     | 2329 | eMol27202230       | -6.4                     | 2380 | eMol16374771       | -6.4                     |
| 2279: | eMol36015328       | -6.5                     | 2330 | eMol27202786       | -6.4                     | 2381 | eMol193274586      | -6.4                     |
| 2280: | eMol36015854       | -6.5                     | 2331 | eMol316926407      | -6.4                     | 2382 | eMol20377949       | -6.4                     |
| 2281: | eMol36016050       | -6.5                     | 2332 | eMol32246985       | -6.4                     | 2383 | eMol24525072       | -6.4                     |
| 2282: | eMol36898026       | -6.5                     | 2333 | eMol3407217        | -6.4                     | 2384 | eMol26291212       | -6.4                     |
| 2283: | eMol43746855       | -6.5                     | 2334 | eMol3501354        | -6.4                     | 2385 | eMol26343081       | -6.4                     |
| 2284: | eMol566444         | -6.5                     | 2335 | eMol36898002       | -6.4                     | 2386 | eMol27202212       | -6.4                     |
| 2285: | CHEMBL189170       | -6.5                     | 2336 | eMol4467282        | -6.4                     | 2387 | eMol27202404       | -6.4                     |
| 2286: | CHEMBL3804860      | -6.5                     | 2337 | eMol561361         | -6.4                     | 2388 | eMol27202418       | -6.4                     |
| 2287: | CHEMBL3818548      | -6.5                     | 2338 | eMol679600         | -6.4                     | 2389 | eMol27202468       | -6.4                     |
| 2288: | eMol16373089       | -6.5                     | 2339 | CHEMBL1214865      | -6.4                     | 2390 | eMol27349409       | -6.4                     |
| 2289: | eMol16385710       | -6.5                     | 2340 | CHEMBL3806281      | -6.4                     | 2391 | eMol29623495       | -6.4                     |
| 2290: | eMol1679132        | -6.5                     | 2341 | eMol1131454        | -6.4                     | 2392 | eMol3245568        | -6.4                     |
| 2291: | eMol18550756       | -6.5                     | 2342 | eMol16379821       | -6.4                     | 2393 | eMol34103610       | -6.4                     |
| 2292: | eMol2166967        | -6.5                     | 2343 | eMol16385692       | -6.4                     | 2394 | eMol36015842       | -6.4                     |
| 2293: | eMol25810173       | -6.5                     | 2344 | eMol1682570        | -6.4                     | 2395 | eMol3663282        | -6.4                     |
| 2294: | eMol27202194       | -6.5                     | 2345 | eMol23180310       | -6.4                     | 2396 | eMol5444549        | -6.4                     |
| 2295: | eMol27202370       | -6.5                     | 2346 | eMol23254399       | -6.4                     | 2397 | CHEMBL1321779      | -6.4                     |
| 2296: | eMol27202976       | -6.5                     | 2347 | eMol26131908       | -6.4                     | 2398 | CHEMBL1577901      | -6.4                     |
| 2297: | eMol3518572        | -6.5                     | 2348 | eMol27182628       | -6.4                     | 2399 | CHEMBL294968       | -6.4                     |
| 2298: | eMol36015838       | -6.5                     | 2349 | eMol3055183        | -6.4                     | 2400 | CHEMBL3417643      | -6.4                     |
| 2299: | eMol44017453       | -6.5                     | 2350 | eMol3316007        | -6.4                     | 2401 | CHEMBL3818714      | -6.4                     |
| 2300: | eMol46210810       | -6.5                     | 2351 | eMol3707946        | -6.4                     | 2402 | eMol1448891        | -6.4                     |
| 2301: | eMol5444547        | -6.5                     | 2352 | eMol5445035        | -6.4                     | 2403 | eMol19248288       | -6.4                     |
| 2302: | eMol5779863        | -6.5                     | 2353 | eMol7270136        | -6.4                     | 2404 | eMol26288149       | -6.4                     |
| 2303: | eMol6806127        | -6.5                     | 2354 | CHEMBL1396361      | -6.4                     | 2405 | eMol27186996       | -6.4                     |
| 2304: | eMol206985650      | -6.4                     | 2355 | CHEMBL1593196      | -6.4                     | 2406 | eMol27202294       | -6.4                     |
| 2305: | eMol26141664       | -6.4                     | 2356 | CHEMBL184749       | -6.4                     | 2407 | eMol27202538       | -6.4                     |
| 2306: | eMol26236636       | -6.4                     | 2357 | CHEMBL3417618      | -6.4                     | 2408 | eMol27202806       | -6.4                     |
| 2307: | eMol27202220       | -6.4                     | 2358 | CHEMBL3818360      | -6.4                     | 2409 | eMol27202890       | -6.4                     |
| 2308: | eMol27202276       | -6.4                     | 2359 | eMol11905854       | -6.4                     | 2410 | eMol2871294        | -6.4                     |
| 2309: | eMol27490285       | -6.4                     | 2360 | eMol16407926       | -6.4                     | 2411 | eMol2992552        | -6.4                     |
| 2310: | eMol2768996        | -6.4                     | 2361 | eMol16408016       | -6.4                     | 2412 | eMol300250258      | -6.4                     |
| 2311: | eMol3376801        | -6.4                     | 2362 | eMol16408020       | -6.4                     | 2413 | eMol316452059      | -6.4                     |
| 2312: | eMol36015840       | -6.4                     | 2363 | eMol17163712       | -6.4                     | 2414 | eMol3443675        | -6.4                     |
| 2313: | eMol36015962       | -6.4                     | 2364 | eMol25816257       | -6.4                     | 2415 | eMol3494000        | -6.4                     |
| 2314: | eMol45705672       | -6.4                     | 2365 | eMol25966290       | -6.4                     | 2416 | eMol36015116       | -6.4                     |
| 2315: | eMol4759218        | -6.4                     | 2366 | eMol26289584       | -6.4                     | 2417 | eMol36733933       | -6.4                     |
| 2316: | eMol5445013        | -6.4                     | 2367 | eMol27187034       | -6.4                     | 2418 | eMol43731752       | -6.4                     |
| 2317: | CHEMBL1391688      | -6.4                     | 2368 | eMol27202748       | -6.4                     | 2419 | eMol43743368       | -6.4                     |
| 2318: | CHEMBL1553786      | -6.4                     | 2369 | eMol30104222       | -6.4                     | 2420 | eMol46210772       | -6.4                     |
| 2319: | CHEMBL3804979      | -6.4                     | 2370 | eMol316975064      | -6.4                     | 2421 | eMol4694025        | -6.4                     |
| 2320: | CHEMBL51620        | -6.4                     | 2371 | eMol31780057       | -6.4                     | 2422 | eMol561611         | -6.4                     |
| 2321: | eMol13491303       | -6.4                     | 2372 | eMol3220074        | -6.4                     | 2423 | CHEMBL1215651      | -6.4                     |
| 2292: | eMol2166967        | -6.5                     | 2343 | eMol16385692       | -6.4                     | 2394 | eMol36015842       | -6.4                     |



Table S1. Continued.

| No.  | Compound Name/Code | Docking Score (kcal/mol) | No.  | Compound Name/Code | Docking Score (kcal/mol) | No.  | Compound Name/Code | Docking Score (kcal/mol) |
|------|--------------------|--------------------------|------|--------------------|--------------------------|------|--------------------|--------------------------|
| 2424 | eMol16056917       | -6.4                     | 2475 | eMol16379145       | -6.4                     | 2526 | eMol11671108       | -6.3                     |
| 2425 | eMol16379139       | -6.4                     | 2476 | eMol16379809       | -6.4                     | 2527 | eMol19031792       | -6.3                     |
| 2426 | eMol18536843       | -6.4                     | 2477 | eMol16390077       | -6.4                     | 2528 | eMol206843422      | -6.3                     |
| 2427 | eMol24021853       | -6.4                     | 2478 | eMol23254331       | -6.4                     | 2529 | eMol24302059       | -6.3                     |
| 2428 | eMol26196308       | -6.4                     | 2479 | eMol26347234       | -6.4                     | 2530 | eMol24534942       | -6.3                     |
| 2429 | eMol26349111       | -6.4                     | 2480 | eMol27045491       | -6.4                     | 2531 | eMol26315552       | -6.3                     |
| 2430 | eMol27202228       | -6.4                     | 2481 | eMol27202428       | -6.4                     | 2532 | eMol27202964       | -6.3                     |
| 2431 | eMol27202812       | -6.4                     | 2482 | eMol27202816       | -6.4                     | 2533 | eMol34181785       | -6.3                     |
| 2432 | eMol29585788       | -6.4                     | 2483 | eMol29633215       | -6.4                     | 2534 | eMol36010131       | -6.3                     |
| 2433 | eMol36015522       | -6.4                     | 2484 | eMol30104214       | -6.4                     | 2535 | eMol36015330       | -6.3                     |
| 2434 | eMol45585828       | -6.4                     | 2485 | eMol35700126       | -6.4                     | 2536 | eMol36016278       | -6.3                     |
| 2435 | eMol4700479        | -6.4                     | 2486 | eMol36015614       | -6.4                     | 2537 | eMol36016614       | -6.3                     |
| 2436 | eMol50159532       | -6.4                     | 2487 | eMol43745108       | -6.4                     | 2538 | eMol43747047       | -6.3                     |
| 2437 | eMol581334         | -6.4                     | 2488 | eMol44123579       | -6.4                     | 2539 | eMol46346846       | -6.3                     |
| 2438 | CHEMBL1366795      | -6.4                     | 2489 | eMol45951547       | -6.4                     | 2540 | eMol4702936        | -6.3                     |
| 2439 | CHEMBL1608564      | -6.4                     | 2490 | eMol5444515        | -6.4                     | 2541 | eMol52129783       | -6.3                     |
| 2440 | CHEMBL3959539      | -6.4                     | 2491 | eMol5444959        | -6.4                     | 2542 | eMol5538570        | -6.3                     |
| 2441 | CHEMBL47230        | -6.4                     | 2492 | eMol6523821        | -6.4                     | 2543 | eMol7289730        | -6.3                     |
| 2442 | eMol11893182       | -6.4                     | 2493 | CHEMBL1345911      | -6.4                     | 2544 | CHEMBL1169938      | -6.3                     |
| 2443 | eMol19250818       | -6.4                     | 2494 | CHEMBL299336       | -6.4                     | 2545 | CHEMBL1394032      | -6.3                     |
| 2444 | eMol20350994       | -6.4                     | 2495 | CHEMBL50538        | -6.4                     | 2546 | CHEMBL341356       | -6.3                     |
| 2445 | eMol23246486       | -6.4                     | 2496 | eMol11915751       | -6.4                     | 2547 | CHEMBL49924        | -6.3                     |
| 2446 | eMol23248155       | -6.4                     | 2497 | eMol16352259       | -6.4                     | 2548 | eMol100292265      | -6.3                     |
| 2447 | eMol24473893       | -6.4                     | 2498 | eMol20333676       | -6.4                     | 2549 | eMol1748351        | -6.3                     |
| 2448 | eMol25797965       | -6.4                     | 2499 | eMol20351269       | -6.4                     | 2550 | eMol18550708       | -6.3                     |
| 2449 | eMol27202368       | -6.4                     | 2500 | eMol206907679      | -6.4                     | 2551 | eMol26141690       | -6.3                     |
| 2450 | eMol276247966      | -6.4                     | 2501 | eMol22050213       | -6.4                     | 2552 | eMol26249989       | -6.3                     |
| 2451 | eMol300994278      | -6.4                     | 2502 | eMol24423650       | -6.4                     | 2553 | eMol27182514       | -6.3                     |
| 2452 | eMol32246425       | -6.4                     | 2503 | eMol24539609       | -6.4                     | 2554 | eMol27187000       | -6.3                     |
| 2453 | eMol36010141       | -6.4                     | 2504 | eMol26141636       | -6.4                     | 2555 | eMol27187420       | -6.3                     |
| 2454 | eMol36015364       | -6.4                     | 2505 | eMol26263630       | -6.4                     | 2556 | eMol27202222       | -6.3                     |
| 2455 | eMol36015864       | -6.4                     | 2506 | eMol26297652       | -6.4                     | 2557 | eMol27202366       | -6.3                     |
| 2456 | eMol36016154       | -6.4                     | 2507 | eMol27187354       | -6.4                     | 2558 | eMol29456700       | -6.3                     |
| 2457 | eMol3666911        | -6.4                     | 2508 | eMol27187408       | -6.4                     | 2559 | eMol2997342        | -6.3                     |
| 2458 | eMol4388249        | -6.4                     | 2509 | eMol27202374       | -6.4                     | 2560 | eMol3131192        | -6.3                     |
| 2459 | eMol4515790        | -6.4                     | 2510 | eMol27202448       | -6.4                     | 2561 | eMol32170345       | -6.3                     |
| 2460 | eMol5444429        | -6.4                     | 2511 | eMol27490301       | -6.4                     | 2562 | eMol3464492        | -6.3                     |
| 2461 | eMol5444627        | -6.4                     | 2512 | eMol32246825       | -6.4                     | 2563 | eMol3523182        | -6.3                     |
| 2462 | eMol5444961        | -6.4                     | 2513 | eMol3352043        | -6.4                     | 2564 | eMol36015110       | -6.3                     |
| 2463 | eMol581222         | -6.4                     | 2514 | eMol3380583        | -6.4                     | 2565 | eMol36015528       | -6.3                     |
| 2464 | eMol7259360        | -6.4                     | 2515 | eMol36015340       | -6.4                     | 2566 | eMol43716283       | -6.3                     |
| 2465 | eMol7281766        | -6.4                     | 2516 | eMol36379003       | -6.4                     | 2567 | eMol43757857       | -6.3                     |
| 2466 | ChEBI94303         | -6.4                     | 2517 | eMol36733939       | -6.4                     | 2568 | eMol679698         | -6.3                     |
| 2467 | CHEMBL1567670      | -6.4                     | 2518 | eMol42849980       | -6.4                     | 2569 | eMol7272218        | -6.3                     |
| 2468 | CHEMBL422227       | -6.4                     | 2519 | eMol565722         | -6.4                     | 2570 | eMol7282414        | -6.3                     |
| 2469 | CHEMBL50824        | -6.4                     | 2520 | eMol7274760        | -6.4                     | 2571 | eMol7284218        | -6.3                     |
| 2470 | eMol129040         | -6.4                     | 2521 | eMol7282976        | -6.4                     | 2572 | CHEMBL110431       | -6.3                     |
| 2471 | eMol1319929        | -6.4                     | 2522 | CHEMBL1358305      | -6.3                     | 2573 | CHEMBL1214796      | -6.3                     |
| 2472 | eMol1386917        | -6.4                     | 2523 | CHEMBL1555962      | -6.3                     | 2574 | CHEMBL1877088      | -6.3                     |
| 2473 | eMol1518824        | -6.4                     | 2524 | CHEMBL3397268      | -6.3                     | 2575 | eMol1444337        | -6.3                     |
| 2474 | eMol16056959       | -6.4                     | 2525 | CHEMBL418632       | -6.3                     | 2576 | eMol16379079       | -6.3                     |
| 2445 | eMol23246486       | -6.4                     | 2496 | eMol11915751       | -6.4                     | 2547 | CHEMBL49924        | -6.3                     |

Table S1. Continued.

| No.   | Compound Name/Code | Docking Score (kcal/mol) | No.  | Compound Name/Code | Docking Score (kcal/mol) | No.  | Compound Name/Code | Docking Score (kcal/mol) |
|-------|--------------------|--------------------------|------|--------------------|--------------------------|------|--------------------|--------------------------|
| 2577: | eMol16379613       | -6.3                     | 2628 | eMol206977208      | -6.3                     | 2679 | eMol26242030       | -6.3                     |
| 2578: | eMol18899052       | -6.3                     | 2629 | eMol24423574       | -6.3                     | 2680 | eMol26245163       | -6.3                     |
| 2579: | eMol23255741       | -6.3                     | 2630 | eMol25775765       | -6.3                     | 2681 | eMol26249746       | -6.3                     |
| 2580: | eMol24113467       | -6.3                     | 2631 | eMol25896467       | -6.3                     | 2682 | eMol27202296       | -6.3                     |
| 2581: | eMol25813433       | -6.3                     | 2632 | eMol26141634       | -6.3                     | 2683 | eMol27490295       | -6.3                     |
| 2582: | eMol26283738       | -6.3                     | 2633 | eMol27187480       | -6.3                     | 2684 | eMol27490303       | -6.3                     |
| 2583: | eMol27182880       | -6.3                     | 2634 | eMol27202494       | -6.3                     | 2685 | eMol27490307       | -6.3                     |
| 2584: | eMol27202478       | -6.3                     | 2635 | eMol277684393      | -6.3                     | 2686 | eMol3393385        | -6.3                     |
| 2585: | eMol31857901       | -6.3                     | 2636 | eMol3017868        | -6.3                     | 2687 | eMol35672400       | -6.3                     |
| 2586: | eMol31950403       | -6.3                     | 2637 | eMol36015338       | -6.3                     | 2688 | eMol36016046       | -6.3                     |
| 2587: | eMol3302941        | -6.3                     | 2638 | eMol42713805       | -6.3                     | 2689 | eMol36016282       | -6.3                     |
| 2588: | eMol36016020       | -6.3                     | 2639 | eMol784260         | -6.3                     | 2690 | eMol43749119       | -6.3                     |
| 2589: | eMol43995169       | -6.3                     | 2640 | CHEMBL1898021      | -6.3                     | 2691 | eMol4727272        | -6.3                     |
| 2590: | eMol45904696       | -6.3                     | 2641 | CHEMBL3397270      | -6.3                     | 2692 | CHEMBL1700745      | -6.3                     |
| 2591: | eMol48213031       | -6.3                     | 2642 | CHEMBL3417621      | -6.3                     | 2693 | CHEMBL1892332      | -6.3                     |
| 2592: | eMol51984479       | -6.3                     | 2643 | CHEMBL50207        | -6.3                     | 2694 | CHEMBL298073       | -6.3                     |
| 2593: | eMol5444431        | -6.3                     | 2644 | eMol11069169       | -6.3                     | 2695 | CHEMBL3627817      | -6.3                     |
| 2594: | eMol5476297        | -6.3                     | 2645 | eMol16379789       | -6.3                     | 2696 | CHEMBL54233        | -6.3                     |
| 2595: | eMol5660295        | -6.3                     | 2646 | eMol16867315       | -6.3                     | 2697 | eMol11990345       | -6.3                     |
| 2596: | eMol6491039        | -6.3                     | 2647 | eMol1749410        | -6.3                     | 2698 | eMol1456432        | -6.3                     |
| 2597: | CHEMBL1902987      | -6.3                     | 2648 | eMol2169306        | -6.3                     | 2699 | eMol16375739       | -6.3                     |
| 2598: | CHEMBL2296351      | -6.3                     | 2649 | eMol24113595       | -6.3                     | 2700 | eMol16379719       | -6.3                     |
| 2599: | CHEMBL597034       | -6.3                     | 2650 | eMol26141520       | -6.3                     | 2701 | eMol206921739      | -6.3                     |
| 2600: | eMol11319931       | -6.3                     | 2651 | eMol26313303       | -6.3                     | 2702 | eMol206965396      | -6.3                     |
| 2601: | eMol16373093       | -6.3                     | 2652 | eMol26351308       | -6.3                     | 2703 | eMol24104760       | -6.3                     |
| 2602: | eMol1763812        | -6.3                     | 2653 | eMol27187510       | -6.3                     | 2704 | eMol27202804       | -6.3                     |
| 2603: | eMol2308402        | -6.3                     | 2654 | eMol27202346       | -6.3                     | 2705 | eMol31991509       | -6.3                     |
| 2604: | eMol24112863       | -6.3                     | 2655 | eMol29577066       | -6.3                     | 2706 | eMol34103848       | -6.3                     |
| 2605: | eMol24507725       | -6.3                     | 2656 | eMol30308339       | -6.3                     | 2707 | eMol34206757       | -6.3                     |
| 2606: | eMol24659821       | -6.3                     | 2657 | eMol316473463      | -6.3                     | 2708 | eMol36015788       | -6.3                     |
| 2607: | eMol2482511        | -6.3                     | 2658 | eMol36010125       | -6.3                     | 2709 | eMol36016044       | -6.3                     |
| 2608: | eMol26141620       | -6.3                     | 2659 | eMol36015672       | -6.3                     | 2710 | eMol36016122       | -6.3                     |
| 2609: | eMol26570013       | -6.3                     | 2660 | eMol43686162       | -6.3                     | 2711 | eMol36016422       | -6.3                     |
| 2610: | eMol27187014       | -6.3                     | 2661 | eMol43749045       | -6.3                     | 2712 | eMol36016572       | -6.3                     |
| 2611: | eMol27202458       | -6.3                     | 2662 | eMol43771176       | -6.3                     | 2713 | eMol43777076       | -6.3                     |
| 2612: | eMol27202838       | -6.3                     | 2663 | eMol45932359       | -6.3                     | 2714 | eMol4694984        | -6.3                     |
| 2613: | eMol29959342       | -6.3                     | 2664 | eMol4896150        | -6.3                     | 2715 | eMol5785536        | -6.3                     |
| 2614: | eMol32014364       | -6.3                     | 2665 | eMol5839003        | -6.3                     | 2716 | eMol7267392        | -6.3                     |
| 2615: | eMol36015646       | -6.3                     | 2666 | eMol7259022        | -6.3                     | 2717 | CHEMBL1214792      | -6.3                     |
| 2616: | eMol45787959       | -6.3                     | 2667 | CHEMBL1442224      | -6.3                     | 2718 | CHEMBL1887151      | -6.3                     |
| 2617: | CHEMBL1879611      | -6.3                     | 2668 | CHEMBL1716610      | -6.3                     | 2719 | CHEMBL2140826      | -6.3                     |
| 2618: | CHEMBL1971499      | -6.3                     | 2669 | CHEMBL1999721      | -6.3                     | 2720 | CHEMBL3417650      | -6.3                     |
| 2619: | CHEMBL3759501      | -6.3                     | 2670 | CHEMBL51005        | -6.3                     | 2721 | eMol13522798       | -6.3                     |
| 2620: | CHEMBL3955772      | -6.3                     | 2671 | eMol101721906      | -6.3                     | 2722 | eMol16760834       | -6.3                     |
| 2621: | CHEMBL400335       | -6.3                     | 2672 | eMol16374577       | -6.3                     | 2723 | eMol16768525       | -6.3                     |
| 2622: | CHEMBL50895        | -6.3                     | 2673 | eMol16407950       | -6.3                     | 2724 | eMol179424331      | -6.3                     |
| 2623: | eMol13396564       | -6.3                     | 2674 | eMol18551172       | -6.3                     | 2725 | eMol19248286       | -6.3                     |
| 2624: | eMol1438752        | -6.3                     | 2675 | eMol25909136       | -6.3                     | 2726 | eMol206843460      | -6.3                     |
| 2625: | eMol16379783       | -6.3                     | 2676 | eMol26141642       | -6.3                     | 2727 | eMol206911215      | -6.3                     |
| 2626: | eMol18961318       | -6.3                     | 2677 | eMol26141692       | -6.3                     | 2728 | eMol25813403       | -6.3                     |
| 2627: | eMol206910400      | -6.3                     | 2678 | eMol26141696       | -6.3                     | 2729 | eMol25889438       | -6.3                     |
| 2598: | CHEMBL2296351      | -6.3                     | 2649 | eMol24113595       | -6.3                     | 2700 | eMol16379719       | -6.3                     |

Table S1. Continued.

| No.   | Compound Name/Code | Docking Score (kcal/mol) | No.   | Compound Name/Code | Docking Score (kcal/mol) | No.  | Compound Name/Code | Docking Score (kcal/mol) |
|-------|--------------------|--------------------------|-------|--------------------|--------------------------|------|--------------------|--------------------------|
| 2730: | eMol27202476       | -6.3                     | 2781  | eMol27202856       | -6.2                     | 2832 | eMol1749778        | -6.2                     |
| 2731: | eMol27350313       | -6.3                     | 2782  | eMol277684403      | -6.2                     | 2833 | eMol206904461      | -6.2                     |
| 2732: | eMol35670816       | -6.3                     | 2783  | eMol29272190       | -6.2                     | 2834 | eMol25797959       | -6.2                     |
| 2733: | eMol3792963        | -6.3                     | 2784  | eMol31758474       | -6.2                     | 2835 | eMol27202474       | -6.2                     |
| 2734: | eMol43943011       | -6.3                     | 2785  | eMol32245085       | -6.2                     | 2836 | eMol33346439       | -6.2                     |
| 2735: | eMol4505656        | -6.3                     | 2786  | eMol36015358       | -6.2                     | 2837 | eMol3518574        | -6.2                     |
| 2736: | eMol4736890        | -6.3                     | 2787  | eMol36015498       | -6.2                     | 2838 | eMol3651674        | -6.2                     |
| 2737: | eMol4839170        | -6.3                     | 2788  | eMol36016042       | -6.2                     | 2839 | eMol43780682       | -6.2                     |
| 2738: | eMol565320         | -6.3                     | 2789  | eMol36016160       | -6.2                     | 2840 | eMol4461665        | -6.2                     |
| 2739: | CHEMBL1325661      | -6.3                     | 2790  | eMol43731196       | -6.2                     | 2841 | eMol4540512        | -6.2                     |
| 2740: | CHEMBL1545153      | -6.3                     | 2791  | eMol46572914       | -6.2                     | 2842 | eMol579696         | -6.2                     |
| 2741: | CHEMBL1600359      | -6.3                     | 2792  | eMol4887803        | -6.2                     | 2843 | eMol587574         | -6.2                     |
| 2742: | CHEMBL1882595      | -6.3                     | 2793  | eMol624287         | -6.2                     | 2844 | CHEMBL1560726      | -6.2                     |
| 2743: | CHEMBL1901940      | -6.3                     | 2794  | eMol7276794        | -6.2                     | 2845 | CHEMBL3644258      | -6.2                     |
| 2744: | CHEMBL3099881      | -6.3                     | 2795  | eMol9989330        | -6.2                     | 2846 | CHEMBL3819208      | -6.2                     |
| 2745: | CHEMBL48826        | -6.3                     | 2796: | CHEMBL3417652      | -6.2                     | 2847 | eMol11696283       | -6.2                     |
| 2746: | eMol1201946        | -6.3                     | 2797  | eMol17485893       | -6.2                     | 2848 | eMol13542778       | -6.2                     |
| 2747: | eMol13550711       | -6.3                     | 2798  | eMol25816263       | -6.2                     | 2849 | eMol16374765       | -6.2                     |
| 2748: | eMol16351583       | -6.3                     | 2799  | eMol25963003       | -6.2                     | 2850 | eMol16379793       | -6.2                     |
| 2749: | eMol16374759       | -6.3                     | 2800  | eMol29639001       | -6.2                     | 2851 | eMol16379835       | -6.2                     |
| 2750: | eMol16407932       | -6.3                     | 2801  | eMol3155052        | -6.2                     | 2852 | eMol1746769        | -6.2                     |
| 2751: | eMol1682098        | -6.3                     | 2802  | eMol3244958        | -6.2                     | 2853 | eMol206985138      | -6.2                     |
| 2752: | eMol19031739       | -6.3                     | 2803  | eMol34147565       | -6.2                     | 2854 | eMol25909732       | -6.2                     |
| 2753: | eMol20382915       | -6.3                     | 2804  | eMol42849978       | -6.2                     | 2855 | eMol26243041       | -6.2                     |
| 2754: | eMol27045537       | -6.3                     | 2805  | eMol43678568       | -6.2                     | 2856 | eMol26348427       | -6.2                     |
| 2755: | eMol27202974       | -6.3                     | 2806  | eMol43685794       | -6.2                     | 2857 | eMol27182890       | -6.2                     |
| 2756: | eMol3024862        | -6.3                     | 2807  | eMol43757813       | -6.2                     | 2858 | eMol27202332       | -6.2                     |
| 2757: | eMol33332789       | -6.3                     | 2808  | eMol44074398       | -6.2                     | 2859 | eMol3050679        | -6.2                     |
| 2758: | eMol3517993        | -6.3                     | 2809  | eMol46210814       | -6.2                     | 2860 | eMol3165810        | -6.2                     |
| 2759: | eMol35670712       | -6.3                     | 2810  | eMol4935136        | -6.2                     | 2861 | eMol34126656       | -6.2                     |
| 2760: | eMol35670806       | -6.3                     | 2811  | eMol5445011        | -6.2                     | 2862 | eMol3516732        | -6.2                     |
| 2761: | eMol36016412       | -6.3                     | 2812  | eMol7289098        | -6.2                     | 2863 | eMol36015356       | -6.2                     |
| 2762: | eMol36016546       | -6.3                     | 2813  | eMol7293496        | -6.2                     | 2864 | eMol36734199       | -6.2                     |
| 2763: | eMol4718351        | -6.3                     | 2814: | CHEMBL1499094      | -6.2                     | 2865 | eMol44000007       | -6.2                     |
| 2764: | eMol5444399        | -6.3                     | 2815  | eMol11939519       | -6.2                     | 2866 | eMol5444827        | -6.2                     |
| 2765: | eMol5444655        | -6.3                     | 2816  | eMol14273668       | -6.2                     | 2867 | eMol5445017        | -6.2                     |
| 2766: | eMol8066589        | -6.3                     | 2817  | eMol193281590      | -6.2                     | 2868 | eMol7266492        | -6.2                     |
| 2767: | CHEMBL1301253      | -6.2                     | 2818  | eMol1995647        | -6.2                     | 2869 | CHEMBL1478140      | -6.2                     |
| 2768: | CHEMBL1305555      | -6.2                     | 2819  | eMol206843420      | -6.2                     | 2870 | CHEMBL1514702      | -6.2                     |
| 2769: | CHEMBL1443325      | -6.2                     | 2820  | eMol25938966       | -6.2                     | 2871 | CHEMBL296038       | -6.2                     |
| 2770: | CHEMBL364326       | -6.2                     | 2821  | eMol26230180       | -6.2                     | 2872 | CHEMBL3804951      | -6.2                     |
| 2771: | CHEMBL49199        | -6.2                     | 2822  | eMol26288616       | -6.2                     | 2873 | eMol2123648        | -6.2                     |
| 2772: | eMol11054214       | -6.2                     | 2823  | eMol27202952       | -6.2                     | 2874 | eMol2210792        | -6.2                     |
| 2773: | eMol16373091       | -6.2                     | 2824  | eMol30078849       | -6.2                     | 2875 | eMol2388346        | -6.2                     |
| 2774: | eMol16379797       | -6.2                     | 2825  | eMol36015866       | -6.2                     | 2876 | eMol24093211       | -6.2                     |
| 2775: | eMol18897534       | -6.2                     | 2826  | eMol36510871       | -6.2                     | 2877 | eMol24113477       | -6.2                     |
| 2776: | eMol18940279       | -6.2                     | 2827  | eMol43782296       | -6.2                     | 2878 | eMol24505508       | -6.2                     |
| 2777: | eMol206907052      | -6.2                     | 2828  | eMol4486344        | -6.2                     | 2879 | eMol26264906       | -6.2                     |
| 2778: | eMol25902692       | -6.2                     | 2829  | eMol45706150       | -6.2                     | 2880 | eMol27202198       | -6.2                     |
| 2779: | eMol26250756       | -6.2                     | 2830  | eMol7260242        | -6.2                     | 2881 | eMol27202406       | -6.2                     |
| 2780: | eMol27186994       | -6.2                     | 2831: | CHEMBL3923521      | -6.2                     | 2882 | eMol32163535       | -6.2                     |
| 2751: | eMol1682098        | -6.3                     | 2802  | eMol3244958        | -6.2                     | 2853 | eMol206985138      | -6.2                     |

Table S1. Continued.

| No.   | Compound Name/Code | Docking Score (kcal/mol) | No.  | Compound Name/Code | Docking Score (kcal/mol) | No.  | Compound Name/Code | Docking Score (kcal/mol) |
|-------|--------------------|--------------------------|------|--------------------|--------------------------|------|--------------------|--------------------------|
| 2883: | eMol36733919       | -6.2                     | 2934 | eMol11921274       | -6.2                     | 2985 | eMol32661622       | -6.1                     |
| 2884: | eMol43743426       | -6.2                     | 2935 | eMol13485875       | -6.2                     | 2986 | eMol3518576        | -6.1                     |
| 2885: | eMol43774431       | -6.2                     | 2936 | eMol16351807       | -6.2                     | 2987 | eMol36010129       | -6.1                     |
| 2886: | eMol45922019       | -6.2                     | 2937 | eMol17219415       | -6.2                     | 2988 | eMol36888157       | -6.1                     |
| 2887: | eMol5538224        | -6.2                     | 2938 | eMol20382754       | -6.2                     | 2989 | eMol42616136       | -6.1                     |
| 2888: | CHEMBL281172       | -6.2                     | 2939 | eMol2362615        | -6.2                     | 2990 | eMol7297106        | -6.1                     |
| 2889: | CHEMBL298152       | -6.2                     | 2940 | eMol25784537       | -6.2                     | 2991 | eMol935440         | -6.1                     |
| 2890: | CHEMBL3936506      | -6.2                     | 2941 | eMol25784541       | -6.2                     | 2992 | eMol9814195        | -6.1                     |
| 2891: | CHEMBL42991        | -6.2                     | 2942 | eMol27202452       | -6.2                     | 2993 | CHEMBL1473299      | -6.1                     |
| 2892: | CHEMBL50206        | -6.2                     | 2943 | eMol32661606       | -6.2                     | 2994 | CHEMBL344096       | -6.1                     |
| 2893: | eMol11874754       | -6.2                     | 2944 | eMol3374251        | -6.2                     | 2995 | CHEMBL3805207      | -6.1                     |
| 2894: | eMol16379617       | -6.2                     | 2945 | eMol34147303       | -6.2                     | 2996 | eMol1118798        | -6.1                     |
| 2895: | eMol1673934        | -6.2                     | 2946 | eMol36010157       | -6.2                     | 2997 | eMol1266015        | -6.1                     |
| 2896: | eMol2025066        | -6.2                     | 2947 | eMol36015756       | -6.2                     | 2998 | eMol17485895       | -6.1                     |
| 2897: | eMol20341799       | -6.2                     | 2948 | eMol36015934       | -6.2                     | 2999 | eMol179180654      | -6.1                     |
| 2898: | eMol32247725       | -6.2                     | 2949 | eMol36015942       | -6.2                     | 3000 | eMol19031804       | -6.1                     |
| 2899: | eMol34207047       | -6.2                     | 2950 | eMol3988552        | -6.2                     | 3001 | eMol25814743       | -6.1                     |
| 2900: | eMol36010087       | -6.2                     | 2951 | eMol4695032        | -6.2                     | 3002 | eMol25819227       | -6.1                     |
| 2901: | eMol36015844       | -6.2                     | 2952 | eMol4714641        | -6.2                     | 3003 | eMol25825139       | -6.1                     |
| 2902: | eMol36016018       | -6.2                     | 2953 | eMol50288672       | -6.2                     | 3004 | eMol26236634       | -6.1                     |
| 2903: | eMol43416567       | -6.2                     | 2954 | eMol5444631        | -6.2                     | 3005 | eMol27045475       | -6.1                     |
| 2904: | eMol43704543       | -6.2                     | 2955 | eMol5444939        | -6.2                     | 3006 | eMol27202772       | -6.1                     |
| 2905: | eMol43777016       | -6.2                     | 2956 | eMol7267352        | -6.2                     | 3007 | eMol27202950       | -6.1                     |
| 2906: | eMol5444507        | -6.2                     | 2957 | CHEMBL1214795      | -6.2                     | 3008 | eMol31832997       | -6.1                     |
| 2907: | eMol82729703       | -6.2                     | 2958 | CHEMBL260470       | -6.2                     | 3009 | eMol33657715       | -6.1                     |
| 2908: | CHEMBL1304839      | -6.2                     | 2959 | eMol16056885       | -6.2                     | 3010 | eMol36015132       | -6.1                     |
| 2909: | CHEMBL50303        | -6.2                     | 2960 | eMol16379583       | -6.2                     | 3011 | eMol36015606       | -6.1                     |
| 2910: | eMol1221018        | -6.2                     | 2961 | eMol18551360       | -6.2                     | 3012 | eMol36016612       | -6.1                     |
| 2911: | eMol13484898       | -6.2                     | 2962 | eMol18877796       | -6.2                     | 3013 | eMol36888187       | -6.1                     |
| 2912: | eMol19032400       | -6.2                     | 2963 | eMol2234154        | -6.2                     | 3014 | eMol4550433        | -6.1                     |
| 2913: | eMol232791660      | -6.2                     | 2964 | eMol27202790       | -6.2                     | 3015 | eMol4709963        | -6.1                     |
| 2914: | eMol24432133       | -6.2                     | 2965 | eMol2889096        | -6.2                     | 3016 | eMol5444425        | -6.1                     |
| 2915: | eMol24453864       | -6.2                     | 2966 | eMol30719809       | -6.2                     | 3017 | eMol5444433        | -6.1                     |
| 2916: | eMol25810033       | -6.2                     | 2967 | eMol36015730       | -6.2                     | 3018 | eMol5538292        | -6.1                     |
| 2917: | eMol26251102       | -6.2                     | 2968 | eMol43995579       | -6.2                     | 3019 | eMol684014         | -6.1                     |
| 2918: | eMol27187020       | -6.2                     | 2969 | eMol559945         | -6.2                     | 3020 | eMol7287216        | -6.1                     |
| 2919: | eMol27202450       | -6.2                     | 2970 | eMol681842         | -6.2                     | 3021 | CHEMBL3805895      | -6.1                     |
| 2920: | eMol301525116      | -6.2                     | 2971 | eMol7288900        | -6.2                     | 3022 | CHEMBL47554        | -6.1                     |
| 2921: | eMol3536592        | -6.2                     | 2972 | eMol8858539        | -6.2                     | 3023 | eMol11677024       | -6.1                     |
| 2922: | eMol36015306       | -6.2                     | 2973 | CHEMBL1331239      | -6.1                     | 3024 | eMol16379077       | -6.1                     |
| 2923: | eMol36015826       | -6.2                     | 2974 | CHEMBL19730        | -6.1                     | 3025 | eMol2306401        | -6.1                     |
| 2924: | eMol36016552       | -6.2                     | 2975 | CHEMBL3945396      | -6.1                     | 3026 | eMol24113837       | -6.1                     |
| 2925: | eMol36016678       | -6.2                     | 2976 | CHEMBL52119        | -6.1                     | 3027 | eMol24659819       | -6.1                     |
| 2926: | eMol36733945       | -6.2                     | 2977 | CHEMBL53036        | -6.1                     | 3028 | eMol2467293        | -6.1                     |
| 2927: | eMol4731515        | -6.2                     | 2978 | eMol13858043       | -6.1                     | 3029 | eMol27187350       | -6.1                     |
| 2928: | eMol5444853        | -6.2                     | 2979 | eMol16379067       | -6.1                     | 3030 | eMol34126716       | -6.1                     |
| 2929: | eMol579572         | -6.2                     | 2980 | eMol20347647       | -6.1                     | 3031 | eMol36015312       | -6.1                     |
| 2930: | CHEMBL184051       | -6.2                     | 2981 | eMol27045587       | -6.1                     | 3032 | eMol36909907       | -6.1                     |
| 2931: | CHEMBL297908       | -6.2                     | 2982 | eMol279157786      | -6.1                     | 3033 | eMol43744868       | -6.1                     |
| 2932: | CHEMBL3644257      | -6.2                     | 2983 | eMol316931780      | -6.1                     | 3034 | eMol44045654       | -6.1                     |
| 2933: | CHEMBL52963        | -6.2                     | 2984 | eMol32246751       | -6.1                     | 3035 | eMol5444329        | -6.1                     |
| 2904: | eMol43704543       | -6.2                     | 2955 | eMol5444939        | -6.2                     | 3006 | eMol27202772       | -6.1                     |

Table S1. Continued.

| No.   | Compound Name/Code | Docking Score (kcal/mol) | No.   | Compound Name/Code | Docking Score (kcal/mol) | No.  | Compound Name/Code | Docking Score (kcal/mol) |
|-------|--------------------|--------------------------|-------|--------------------|--------------------------|------|--------------------|--------------------------|
| 3036: | eMol5444617        | -6.1                     | 3087  | eMol49023259       | -6.1                     | 3138 | eMol5444443        | -6.1                     |
| 3037: | eMol681908         | -6.1                     | 3088  | eMol52239931       | -6.1                     | 3139 | eMol5444449        | -6.1                     |
| 3038: | CHEMBL298261       | -6.1                     | 3089  | eMol561665         | -6.1                     | 3140 | eMol5444855        | -6.1                     |
| 3039: | CHEMBL3417657      | -6.1                     | 3090  | eMol562441         | -6.1                     | 3141 | CHEMBL1415373      | -6.1                     |
| 3040: | eMol16379633       | -6.1                     | 3091  | eMol8310757        | -6.1                     | 3142 | CHEMBL1548408      | -6.1                     |
| 3041: | eMol16795339       | -6.1                     | 3092  | eMol98685524       | -6.1                     | 3143 | CHEMBL3088320      | -6.1                     |
| 3042: | eMol26348928       | -6.1                     | 3093: | CHEMBL1307530      | -6.1                     | 3144 | eMol1035519        | -6.1                     |
| 3043: | eMol27202834       | -6.1                     | 3094: | CHEMBL1437582      | -6.1                     | 3145 | eMol1226533        | -6.1                     |
| 3044: | eMol27202854       | -6.1                     | 3095: | CHEMBL3417630      | -6.1                     | 3146 | eMol13084309       | -6.1                     |
| 3045: | eMol2993561        | -6.1                     | 3096  | CHEMBL54011        | -6.1                     | 3147 | eMol16351861       | -6.1                     |
| 3046: | eMol29970720       | -6.1                     | 3097  | eMol2208787        | -6.1                     | 3148 | eMol18930908       | -6.1                     |
| 3047: | eMol3315627        | -6.1                     | 3098  | eMol2222259        | -6.1                     | 3149 | eMol1990456        | -6.1                     |
| 3048: | eMol3398875        | -6.1                     | 3099  | eMol2306586        | -6.1                     | 3150 | eMol20382752       | -6.1                     |
| 3049: | eMol35670480       | -6.1                     | 3100  | eMol27186988       | -6.1                     | 3151 | eMol27485968       | -6.1                     |
| 3050: | eMol36016424       | -6.1                     | 3101  | eMol27187200       | -6.1                     | 3152 | eMol29991603       | -6.1                     |
| 3051: | eMol36016438       | -6.1                     | 3102  | eMol27202436       | -6.1                     | 3153 | eMol300148591      | -6.1                     |
| 3052: | eMol36016640       | -6.1                     | 3103  | eMol27202928       | -6.1                     | 3154 | eMol3052111        | -6.1                     |
| 3053: | eMol36016646       | -6.1                     | 3104  | eMol27202930       | -6.1                     | 3155 | eMol317379879      | -6.1                     |
| 3054: | eMol5444611        | -6.1                     | 3105  | eMol2742270        | -6.1                     | 3156 | eMol32245541       | -6.1                     |
| 3055: | eMol5445001        | -6.1                     | 3106  | eMol27490349       | -6.1                     | 3157 | eMol32246329       | -6.1                     |
| 3056: | eMol5538612        | -6.1                     | 3107  | eMol2992536        | -6.1                     | 3158 | eMol36733917       | -6.1                     |
| 3057: | eMol7280788        | -6.1                     | 3108  | eMol3315543        | -6.1                     | 3159 | eMol43789927       | -6.1                     |
| 3058: | eMol7293044        | -6.1                     | 3109  | eMol36015534       | -6.1                     | 3160 | eMol4388901        | -6.1                     |
| 3059: | eMol8858469        | -6.1                     | 3110  | eMol36015810       | -6.1                     | 3161 | eMol4716784        | -6.1                     |
| 3060: | eMol936598         | -6.1                     | 3111  | eMol36016554       | -6.1                     | 3162 | eMol49902893       | -6.1                     |
| 3061: | eMol98721312       | -6.1                     | 3112  | eMol36898000       | -6.1                     | 3163 | eMol5444615        | -6.1                     |
| 3062: | CHEMBL1520424      | -6.1                     | 3113  | eMol44590310       | -6.1                     | 3164 | eMol5444647        | -6.1                     |
| 3063: | CHEMBL1711522      | -6.1                     | 3114  | eMol4694279        | -6.1                     | 3165 | eMol5538248        | -6.1                     |
| 3064: | CHEMBL1885709      | -6.1                     | 3115  | eMol4702837        | -6.1                     | 3166 | eMol5538440        | -6.1                     |
| 3065: | CHEMBL3417648      | -6.1                     | 3116  | eMol49186053       | -6.1                     | 3167 | eMol5827739        | -6.1                     |
| 3066: | CHEMBL45717        | -6.1                     | 3117  | eMol5538746        | -6.1                     | 3168 | eMol629457         | -6.1                     |
| 3067: | eMol11936467       | -6.1                     | 3118: | CHEMBL1406694      | -6.1                     | 3169 | CHEMBL1449112      | -6.1                     |
| 3068: | eMol13452524       | -6.1                     | 3119  | eMol11943360       | -6.1                     | 3170 | CHEMBL297686       | -6.1                     |
| 3069: | eMol20374348       | -6.1                     | 3120  | eMol16374583       | -6.1                     | 3171 | CHEMBL3417642      | -6.1                     |
| 3070: | eMol2213399        | -6.1                     | 3121  | eMol179170457      | -6.1                     | 3172 | CHEMBL3951235      | -6.1                     |
| 3071: | eMol24428010       | -6.1                     | 3122  | eMol2209089        | -6.1                     | 3173 | eMol16374795       | -6.1                     |
| 3072: | eMol24652558       | -6.1                     | 3123  | eMol23993871       | -6.1                     | 3174 | eMol16379071       | -6.1                     |
| 3073: | eMol25775757       | -6.1                     | 3124  | eMol25782469       | -6.1                     | 3175 | eMol19385162       | -6.1                     |
| 3074: | eMol25877073       | -6.1                     | 3125  | eMol26656725       | -6.1                     | 3176 | eMol1975589        | -6.1                     |
| 3075: | eMol27187348       | -6.1                     | 3126  | eMol27202784       | -6.1                     | 3177 | eMol25816245       | -6.1                     |
| 3076: | eMol27202434       | -6.1                     | 3127  | eMol27490351       | -6.1                     | 3178 | eMol27182636       | -6.1                     |
| 3077: | eMol27202832       | -6.1                     | 3128  | eMol28321918       | -6.1                     | 3179 | eMol27202482       | -6.1                     |
| 3078: | eMol27490629       | -6.1                     | 3129  | eMol3021957        | -6.1                     | 3180 | eMol27202938       | -6.1                     |
| 3079: | eMol3053706        | -6.1                     | 3130  | eMol3264054        | -6.1                     | 3181 | eMol3063576        | -6.1                     |
| 3080: | eMol3400337        | -6.1                     | 3131  | eMol36015426       | -6.1                     | 3182 | eMol3091693        | -6.1                     |
| 3081: | eMol36015978       | -6.1                     | 3132  | eMol36015510       | -6.1                     | 3183 | eMol3397107        | -6.1                     |
| 3082: | eMol36016626       | -6.1                     | 3133  | eMol36016666       | -6.1                     | 3184 | eMol36015988       | -6.1                     |
| 3083: | eMol43686132       | -6.1                     | 3134  | eMol36734197       | -6.1                     | 3185 | eMol36016416       | -6.1                     |
| 3084: | eMol4477570        | -6.1                     | 3135  | eMol36913018       | -6.1                     | 3186 | eMol4694992        | -6.1                     |
| 3085: | eMol45696249       | -6.1                     | 3136  | eMol43752173       | -6.1                     | 3187 | eMol5444391        | -6.1                     |
| 3086: | eMol4573222        | -6.1                     | 3137  | eMol43780890       | -6.1                     | 3188 | eMol5444525        | -6.1                     |
| 3057: | eMol7280788        | -6.1                     | 3108  | eMol3315543        | -6.1                     | 3159 | eMol43789927       | -6.1                     |

Table S1. Continued.

| No.  | Compound Name/Code | Docking Score (kcal/mol) | No.  | Compound Name/Code | Docking Score (kcal/mol) | No.  | Compound Name/Code | Docking Score (kcal/mol) |
|------|--------------------|--------------------------|------|--------------------|--------------------------|------|--------------------|--------------------------|
| 3189 | eMol5444779        | -6.1                     | 3240 | eMol20337436       | -6.0                     | 3291 | eMol25784125       | -6.0                     |
| 3190 | eMol5445019        | -6.1                     | 3241 | eMol2126263        | -6.0                     | 3292 | eMol26188103       | -6.0                     |
| 3191 | eMol566446         | -6.1                     | 3242 | eMol24109710       | -6.0                     | 3293 | eMol27202954       | -6.0                     |
| 3192 | eMol587772         | -6.1                     | 3243 | eMol24484845       | -6.0                     | 3294 | eMol31758530       | -6.0                     |
| 3193 | eMol7288156        | -6.1                     | 3244 | eMol24526125       | -6.0                     | 3295 | eMol32245537       | -6.0                     |
| 3194 | CHEMBL1572860      | -6.1                     | 3245 | eMol25810047       | -6.0                     | 3296 | eMol3316876        | -6.0                     |
| 3195 | CHEMBL1736020      | -6.1                     | 3246 | eMol26141668       | -6.0                     | 3297 | eMol3423798        | -6.0                     |
| 3196 | eMol11049916       | -6.1                     | 3247 | eMol27187296       | -6.0                     | 3298 | eMol36016292       | -6.0                     |
| 3197 | eMol14071710       | -6.1                     | 3248 | eMol313096295      | -6.0                     | 3299 | eMol36636761       | -6.0                     |
| 3198 | eMol17487545       | -6.1                     | 3249 | eMol3457575        | -6.0                     | 3300 | eMol43745160       | -6.0                     |
| 3199 | eMol193274204      | -6.1                     | 3250 | eMol36015690       | -6.0                     | 3301 | eMol43757701       | -6.0                     |
| 3200 | eMol2130267        | -6.1                     | 3251 | eMol45560599       | -6.0                     | 3302 | eMol45687695       | -6.0                     |
| 3201 | eMol25784121       | -6.1                     | 3252 | eMol5444609        | -6.0                     | 3303 | eMol565260         | -6.0                     |
| 3202 | eMol26244399       | -6.1                     | 3253 | eMol6812204        | -6.0                     | 3304 | eMol579976         | -6.0                     |
| 3203 | eMol27202830       | -6.1                     | 3254 | CHEMBL1320203      | -6.0                     | 3305 | eMol6546367        | -6.0                     |
| 3204 | eMol27490347       | -6.1                     | 3255 | CHEMBL1492493      | -6.0                     | 3306 | eMol7266946        | -6.0                     |
| 3205 | eMol3048978        | -6.1                     | 3256 | CHEMBL296457       | -6.0                     | 3307 | CHEMBL1333010      | -6.0                     |
| 3206 | eMol3318318        | -6.1                     | 3257 | eMol101721903      | -6.0                     | 3308 | CHEMBL1875720      | -6.0                     |
| 3207 | eMol3460521        | -6.1                     | 3258 | eMol11063247       | -6.0                     | 3309 | CHEMBL3926487      | -6.0                     |
| 3208 | eMol36015668       | -6.1                     | 3259 | eMol11827681       | -6.0                     | 3310 | eMol11920572       | -6.0                     |
| 3209 | eMol36015710       | -6.1                     | 3260 | eMol11908175       | -6.0                     | 3311 | eMol11924298       | -6.0                     |
| 3210 | eMol75947178       | -6.1                     | 3261 | eMol18841974       | -6.0                     | 3312 | eMol13536327       | -6.0                     |
| 3211 | CHEMBL1390719      | -6.0                     | 3262 | eMol24170571       | -6.0                     | 3313 | eMol16378913       | -6.0                     |
| 3212 | CHEMBL300718       | -6.0                     | 3263 | eMol2498271        | -6.0                     | 3314 | eMol16379715       | -6.0                     |
| 3213 | eMol12034278       | -6.0                     | 3264 | eMol25823463       | -6.0                     | 3315 | eMol16379733       | -6.0                     |
| 3214 | eMol13870199       | -6.0                     | 3265 | eMol25881352       | -6.0                     | 3316 | eMol19031541       | -6.0                     |
| 3215 | eMol16374761       | -6.0                     | 3266 | eMol27495723       | -6.0                     | 3317 | eMol26339153       | -6.0                     |
| 3216 | eMol16668429       | -6.0                     | 3267 | eMol2992822        | -6.0                     | 3318 | eMol27187016       | -6.0                     |
| 3217 | eMol1684723        | -6.0                     | 3268 | eMol32247779       | -6.0                     | 3319 | eMol27202318       | -6.0                     |
| 3218 | eMol17487345       | -6.0                     | 3269 | eMol36015604       | -6.0                     | 3320 | eMol27202480       | -6.0                     |
| 3219 | eMol19041072       | -6.0                     | 3270 | eMol3651370        | -6.0                     | 3321 | eMol3460171        | -6.0                     |
| 3220 | eMol19076610       | -6.0                     | 3271 | eMol36898006       | -6.0                     | 3322 | eMol3492428        | -6.0                     |
| 3221 | eMol19567048       | -6.0                     | 3272 | eMol43744852       | -6.0                     | 3323 | eMol36015722       | -6.0                     |
| 3222 | eMol206907990      | -6.0                     | 3273 | eMol43779180       | -6.0                     | 3324 | eMol36015958       | -6.0                     |
| 3223 | eMol22755694       | -6.0                     | 3274 | eMol5777105        | -6.0                     | 3325 | eMol4382848        | -6.0                     |
| 3224 | eMol24004870       | -6.0                     | 3275 | eMol579208         | -6.0                     | 3326 | eMol4395800        | -6.0                     |
| 3225 | eMol24113537       | -6.0                     | 3276 | eMol7270508        | -6.0                     | 3327 | eMol4693783        | -6.0                     |
| 3226 | eMol25583051       | -6.0                     | 3277 | eMol98536537       | -6.0                     | 3328 | eMol5444503        | -6.0                     |
| 3227 | eMol27182870       | -6.0                     | 3278 | CHEMBL1475496      | -6.0                     | 3329 | eMol935476         | -6.0                     |
| 3228 | eMol27202840       | -6.0                     | 3279 | CHEMBL1488729      | -6.0                     | 3330 | CHEMBL3417626      | -6.0                     |
| 3229 | eMol27202972       | -6.0                     | 3280 | CHEMBL1536346      | -6.0                     | 3331 | CHEMBL3444374      | -6.0                     |
| 3230 | eMol33328676       | -6.0                     | 3281 | CHEMBL43557        | -6.0                     | 3332 | CHEMBL3806217      | -6.0                     |
| 3231 | eMol3397089        | -6.0                     | 3282 | eMol1149945        | -6.0                     | 3333 | CHEMBL43877        | -6.0                     |
| 3232 | eMol36010135       | -6.0                     | 3283 | eMol1415846        | -6.0                     | 3334 | eMol172296216      | -6.0                     |
| 3233 | eMol36015936       | -6.0                     | 3284 | eMol16378909       | -6.0                     | 3335 | eMol206976528      | -6.0                     |
| 3234 | eMol36733947       | -6.0                     | 3285 | eMol16407976       | -6.0                     | 3336 | eMol2212585        | -6.0                     |
| 3235 | eMol43747061       | -6.0                     | 3286 | eMol18831935       | -6.0                     | 3337 | eMol2438554        | -6.0                     |
| 3236 | eMol4383786        | -6.0                     | 3287 | eMol18923614       | -6.0                     | 3338 | eMol26141626       | -6.0                     |
| 3237 | eMol46210774       | -6.0                     | 3288 | eMol2232828        | -6.0                     | 3339 | eMol27045489       | -6.0                     |
| 3238 | eMol5444499        | -6.0                     | 3289 | eMol23999017       | -6.0                     | 3340 | eMol3277055        | -6.0                     |
| 3239 | CHEMBL3417625      | -6.0                     | 3290 | eMol24113623       | -6.0                     | 3341 | eMol3351148        | -6.0                     |
| 3210 | eMol75947178       | -6.1                     | 3261 | eMol18841974       | -6.0                     | 3312 | eMol13536327       | -6.0                     |



Table S1. Continued.

| No.   | Compound Name/Code | Docking Score (kcal/mol) | No.  | Compound Name/Code | Docking Score (kcal/mol) | No.  | Compound Name/Code | Docking Score (kcal/mol) |
|-------|--------------------|--------------------------|------|--------------------|--------------------------|------|--------------------|--------------------------|
| 3342: | eMol3395457        | -6.0                     | 3393 | eMol2992524        | -6.0                     | 3444 | eMol4544980        | -6.0                     |
| 3343: | eMol3499188        | -6.0                     | 3394 | eMol3111079        | -6.0                     | 3445 | eMol4694293        | -6.0                     |
| 3344: | eMol35670178       | -6.0                     | 3395 | eMol3119032        | -6.0                     | 3446 | eMol4711170        | -6.0                     |
| 3345: | eMol36015970       | -6.0                     | 3396 | eMol32245409       | -6.0                     | 3447 | eMol5444385        | -6.0                     |
| 3346: | eMol36016116       | -6.0                     | 3397 | eMol32246319       | -6.0                     | 3448 | eMol5444405        | -6.0                     |
| 3347: | eMol36733931       | -6.0                     | 3398 | eMol3254168        | -6.0                     | 3449 | eMol5444553        | -6.0                     |
| 3348: | eMol36733937       | -6.0                     | 3399 | eMol33344239       | -6.0                     | 3450 | eMol7276298        | -6.0                     |
| 3349: | eMol36888153       | -6.0                     | 3400 | eMol36016004       | -6.0                     | 3451 | eMol7283516        | -6.0                     |
| 3350: | eMol44073193       | -6.0                     | 3401 | eMol36016280       | -6.0                     | 3452 | eMol72989932       | -6.0                     |
| 3351: | eMol5444923        | -6.0                     | 3402 | eMol36016538       | -6.0                     | 3453 | eMol8853953        | -6.0                     |
| 3352: | eMol6546369        | -6.0                     | 3403 | eMol560173         | -6.0                     | 3454 | eMol97962232       | -6.0                     |
| 3353: | eMol674701         | -6.0                     | 3404 | eMol566772         | -6.0                     | 3455 | eMol98985756       | -6.0                     |
| 3354: | eMol936508         | -6.0                     | 3405 | eMol7289978        | -6.0                     | 3456 | CHEMBL1347075      | -5.9                     |
| 3355: | CHEMBL85147        | -6.0                     | 3406 | CHEMBL1391450      | -6.0                     | 3457 | CHEMBL85119        | -5.9                     |
| 3356: | eMol11071012       | -6.0                     | 3407 | CHEMBL361653       | -6.0                     | 3458 | eMol1201940        | -5.9                     |
| 3357: | eMol11828091       | -6.0                     | 3408 | CHEMBL3805543      | -6.0                     | 3459 | eMol1749926        | -5.9                     |
| 3358: | eMol16379193       | -6.0                     | 3409 | CHEMBL3805810      | -6.0                     | 3460 | eMol25938161       | -5.9                     |
| 3359: | eMol16379649       | -6.0                     | 3410 | CHEMBL46620        | -6.0                     | 3461 | eMol26141630       | -5.9                     |
| 3360: | eMol16379827       | -6.0                     | 3411 | eMol11896654       | -6.0                     | 3462 | eMol27202850       | -5.9                     |
| 3361: | eMol16379865       | -6.0                     | 3412 | eMol11939765       | -6.0                     | 3463 | eMol3252276        | -5.9                     |
| 3362: | eMol27490343       | -6.0                     | 3413 | eMol1681159        | -6.0                     | 3464 | eMol36015366       | -5.9                     |
| 3363: | eMol29662423       | -6.0                     | 3414 | eMol27045563       | -6.0                     | 3465 | eMol36015634       | -5.9                     |
| 3364: | eMol32247207       | -6.0                     | 3415 | eMol27182530       | -6.0                     | 3466 | eMol36015670       | -5.9                     |
| 3365: | eMol3585513        | -6.0                     | 3416 | eMol27186992       | -6.0                     | 3467 | eMol36015736       | -5.9                     |
| 3366: | eMol36015644       | -6.0                     | 3417 | eMol27202822       | -6.0                     | 3468 | eMol36016548       | -5.9                     |
| 3367: | eMol36015744       | -6.0                     | 3418 | eMol32014360       | -6.0                     | 3469 | eMol3651372        | -5.9                     |
| 3368: | eMol36016290       | -6.0                     | 3419 | eMol3255018        | -6.0                     | 3470 | eMol43716255       | -5.9                     |
| 3369: | eMol36016638       | -6.0                     | 3420 | eMol36015696       | -6.0                     | 3471 | eMol5444409        | -5.9                     |
| 3370: | eMol36619357       | -6.0                     | 3421 | eMol36016016       | -6.0                     | 3472 | eMol5444919        | -5.9                     |
| 3371: | eMol44073265       | -6.0                     | 3422 | eMol36016644       | -6.0                     | 3473 | eMol5447791        | -5.9                     |
| 3372: | eMol44131056       | -6.0                     | 3423 | eMol43772250       | -6.0                     | 3474 | eMol5538604        | -5.9                     |
| 3373: | eMol4473164        | -6.0                     | 3424 | eMol48938138       | -6.0                     | 3475 | eMol5538882        | -5.9                     |
| 3374: | eMol5444511        | -6.0                     | 3425 | eMol5444323        | -6.0                     | 3476 | eMol579138         | -5.9                     |
| 3375: | eMol5444837        | -6.0                     | 3426 | eMol5444513        | -6.0                     | 3477 | eMol7263572        | -5.9                     |
| 3376: | eMol5444857        | -6.0                     | 3427 | eMol7277736        | -6.0                     | 3478 | eMol7280576        | -5.9                     |
| 3377: | eMol5538878        | -6.0                     | 3428 | CHEMBL1482443      | -6.0                     | 3479 | CHEMBL1327048      | -5.9                     |
| 3378: | eMol6829772        | -6.0                     | 3429 | eMol24428102       | -6.0                     | 3480 | CHEMBL1453502      | -5.9                     |
| 3379: | eMol7272446        | -6.0                     | 3430 | eMol25814749       | -6.0                     | 3481 | CHEMBL1462195      | -5.9                     |
| 3380: | eMol1026757        | -6.0                     | 3431 | eMol26241386       | -6.0                     | 3482 | CHEMBL3417620      | -5.9                     |
| 3381: | eMol1077066        | -6.0                     | 3432 | eMol27182364       | -6.0                     | 3483 | CHEMBL46368        | -5.9                     |
| 3382: | eMol1198254        | -6.0                     | 3433 | eMol27202432       | -6.0                     | 3484 | eMol1448893        | -5.9                     |
| 3383: | eMol16374763       | -6.0                     | 3434 | eMol27490299       | -6.0                     | 3485 | eMol16379635       | -5.9                     |
| 3384: | eMol1878750        | -6.0                     | 3435 | eMol27490305       | -6.0                     | 3486 | eMol16379679       | -5.9                     |
| 3385: | eMol2388279        | -6.0                     | 3436 | eMol29272184       | -6.0                     | 3487 | eMol16379795       | -5.9                     |
| 3386: | eMol25797963       | -6.0                     | 3437 | eMol3073582        | -6.0                     | 3488 | eMol23982156       | -5.9                     |
| 3387: | eMol25813429       | -6.0                     | 3438 | eMol3461011        | -6.0                     | 3489 | eMol25797945       | -5.9                     |
| 3388: | eMol25814739       | -6.0                     | 3439 | eMol36015992       | -6.0                     | 3490 | eMol2709463        | -5.9                     |
| 3389: | eMol26333881       | -6.0                     | 3440 | eMol36898040       | -6.0                     | 3491 | eMol27202860       | -5.9                     |
| 3390: | eMol27045581       | -6.0                     | 3441 | eMol43757699       | -6.0                     | 3492 | eMol29274292       | -5.9                     |
| 3391: | eMol27202534       | -6.0                     | 3442 | eMol43771188       | -6.0                     | 3493 | eMol30117396       | -5.9                     |
| 3392: | eMol27202944       | -6.0                     | 3443 | eMol44012299       | -6.0                     | 3494 | eMol30308489       | -5.9                     |
| 3363: | eMol29662423       | -6.0                     | 3414 | eMol27045563       | -6.0                     | 3465 | eMol36015634       | -5.9                     |

Table S1. Continued.

| No.  | Compound Name/Code | Docking Score (kcal/mol) | No.  | Compound Name/Code | Docking Score (kcal/mol) | No.  | Compound Name/Code | Docking Score (kcal/mol) |
|------|--------------------|--------------------------|------|--------------------|--------------------------|------|--------------------|--------------------------|
| 3495 | eMol31758354       | -5.9                     | 3546 | eMol48996032       | -5.9                     | 3597 | eMol2045101        | -5.9                     |
| 3496 | eMol32245651       | -5.9                     | 3547 | eMol5445039        | -5.9                     | 3598 | eMol26141652       | -5.9                     |
| 3497 | eMol3308467        | -5.9                     | 3548 | eMol5527763        | -5.9                     | 3599 | eMol2992478        | -5.9                     |
| 3498 | eMol36016558       | -5.9                     | 3549 | eMol560175         | -5.9                     | 3600 | eMol3007749        | -5.9                     |
| 3499 | eMol36016632       | -5.9                     | 3550 | eMol7285010        | -5.9                     | 3601 | eMol36010137       | -5.9                     |
| 3500 | eMol36733927       | -5.9                     | 3551 | CHEMBL1409464      | -5.9                     | 3602 | eMol36010139       | -5.9                     |
| 3501 | eMol43745052       | -5.9                     | 3552 | CHEMBL1503062      | -5.9                     | 3603 | eMol36016014       | -5.9                     |
| 3502 | eMol43772256       | -5.9                     | 3553 | CHEMBL3417622      | -5.9                     | 3604 | eMol43420012       | -5.9                     |
| 3503 | eMol43775420       | -5.9                     | 3554 | CHEMBL3417651      | -5.9                     | 3605 | eMol43691638       | -5.9                     |
| 3504 | eMol44519731       | -5.9                     | 3555 | CHEMBL3627819      | -5.9                     | 3606 | eMol4708865        | -5.9                     |
| 3505 | eMol5444325        | -5.9                     | 3556 | CHEMBL3805842      | -5.9                     | 3607 | eMol5444505        | -5.9                     |
| 3506 | eMol5444521        | -5.9                     | 3557 | CHEMBL42254        | -5.9                     | 3608 | eMol5444929        | -5.9                     |
| 3507 | eMol5444937        | -5.9                     | 3558 | eMol16375243       | -5.9                     | 3609 | eMol8599848        | -5.9                     |
| 3508 | eMol6798950        | -5.9                     | 3559 | eMol16757822       | -5.9                     | 3610 | eMol98035511       | -5.9                     |
| 3509 | eMol7669354        | -5.9                     | 3560 | eMol18832810       | -5.9                     | 3611 | eMol98295135       | -5.9                     |
| 3510 | eMol8858445        | -5.9                     | 3561 | eMol2045239        | -5.9                     | 3612 | CHEMBL116635       | -5.9                     |
| 3511 | CHEMBL1368478      | -5.9                     | 3562 | eMol206984662      | -5.9                     | 3613 | CHEMBL1480909      | -5.9                     |
| 3512 | CHEMBL1497366      | -5.9                     | 3563 | eMol24102384       | -5.9                     | 3614 | CHEMBL1570569      | -5.9                     |
| 3513 | eMol16056937       | -5.9                     | 3564 | eMol27202524       | -5.9                     | 3615 | CHEMBL184700       | -5.9                     |
| 3514 | eMol19076760       | -5.9                     | 3565 | eMol3061940        | -5.9                     | 3616 | CHEMBL3806223      | -5.9                     |
| 3515 | eMol206993232      | -5.9                     | 3566 | eMol3525797        | -5.9                     | 3617 | eMol11897152       | -5.9                     |
| 3516 | eMol24110312       | -5.9                     | 3567 | eMol36015428       | -5.9                     | 3618 | eMol16351881       | -5.9                     |
| 3517 | eMol25816331       | -5.9                     | 3568 | eMol36016012       | -5.9                     | 3619 | eMol16374603       | -5.9                     |
| 3518 | eMol27187010       | -5.9                     | 3569 | eMol36016152       | -5.9                     | 3620 | eMol19076762       | -5.9                     |
| 3519 | eMol27202218       | -5.9                     | 3570 | eMol43731528       | -5.9                     | 3621 | eMol206977250      | -5.9                     |
| 3520 | eMol27202946       | -5.9                     | 3571 | eMol43745064       | -5.9                     | 3622 | eMol27115416       | -5.9                     |
| 3521 | eMol30083536       | -5.9                     | 3572 | eMol48982458       | -5.9                     | 3623 | eMol27187292       | -5.9                     |
| 3522 | eMol3245586        | -5.9                     | 3573 | eMol581336         | -5.9                     | 3624 | eMol27202396       | -5.9                     |
| 3523 | eMol3379409        | -5.9                     | 3574 | eMol679602         | -5.9                     | 3625 | eMol32247059       | -5.9                     |
| 3524 | eMol36015702       | -5.9                     | 3575 | eMol76020498       | -5.9                     | 3626 | eMol34126722       | -5.9                     |
| 3525 | eMol36016164       | -5.9                     | 3576 | eMol956537         | -5.9                     | 3627 | eMol36015618       | -5.9                     |
| 3526 | eMol36016634       | -5.9                     | 3577 | eMol98451737       | -5.9                     | 3628 | eMol36015938       | -5.9                     |
| 3527 | eMol36016662       | -5.9                     | 3578 | CHEMBL3251278      | -5.9                     | 3629 | eMol36015990       | -5.9                     |
| 3528 | eMol43745897       | -5.9                     | 3579 | CHEMBL3303662      | -5.9                     | 3630 | eMol36016532       | -5.9                     |
| 3529 | eMol5444915        | -5.9                     | 3580 | CHEMBL3417623      | -5.9                     | 3631 | eMol5538886        | -5.9                     |
| 3530 | eMol6770480        | -5.9                     | 3581 | CHEMBL3417653      | -5.9                     | 3632 | eMol5747647        | -5.9                     |
| 3531 | eMol6844944        | -5.9                     | 3582 | CHEMBL52027        | -5.9                     | 3633 | eMol7276176        | -5.9                     |
| 3532 | eMol7276886        | -5.9                     | 3583 | eMol206962509      | -5.9                     | 3634 | CHEMBL1416395      | -5.9                     |
| 3533 | eMol7294930        | -5.9                     | 3584 | eMol27202438       | -5.9                     | 3635 | CHEMBL1529015      | -5.9                     |
| 3534 | CHEMBL1559259      | -5.9                     | 3585 | eMol32246641       | -5.9                     | 3636 | CHEMBL3417619      | -5.9                     |
| 3535 | eMol11905852       | -5.9                     | 3586 | eMol34147555       | -5.9                     | 3637 | CHEMBL3818256      | -5.9                     |
| 3536 | eMol16378915       | -5.9                     | 3587 | eMol5444389        | -5.9                     | 3638 | eMol20351100       | -5.9                     |
| 3537 | eMol27490283       | -5.9                     | 3588 | eMol5538744        | -5.9                     | 3639 | eMol2123188        | -5.9                     |
| 3538 | eMol277684421      | -5.9                     | 3589 | eMol685354         | -5.9                     | 3640 | eMol2194421        | -5.9                     |
| 3539 | eMol3120283        | -5.9                     | 3590 | CHEMBL1323430      | -5.9                     | 3641 | eMol25895035       | -5.9                     |
| 3540 | eMol32417568       | -5.9                     | 3591 | CHEMBL42492        | -5.9                     | 3642 | eMol27202376       | -5.9                     |
| 3541 | eMol3484149        | -5.9                     | 3592 | CHEMBL50183        | -5.9                     | 3643 | eMol27202820       | -5.9                     |
| 3542 | eMol36015388       | -5.9                     | 3593 | eMol101338171      | -5.9                     | 3644 | eMol2992538        | -5.9                     |
| 3543 | eMol3628332        | -5.9                     | 3594 | eMol16379655       | -5.9                     | 3645 | eMol32551016       | -5.9                     |
| 3544 | eMol43779182       | -5.9                     | 3595 | eMol16755860       | -5.9                     | 3646 | eMol36010119       | -5.9                     |
| 3545 | eMol43943035       | -5.9                     | 3596 | eMol17182671       | -5.9                     | 3647 | eMol36015538       | -5.9                     |

Table S1. *Continued.*

| No.   | Compound Name/Code | Docking Score (kcal/mol) | No.  | Compound Name/Code | Docking Score (kcal/mol) | No.  | Compound Name/Code | Docking Score (kcal/mol) |
|-------|--------------------|--------------------------|------|--------------------|--------------------------|------|--------------------|--------------------------|
| 3648: | eMol36015946       | -5.9                     | 3699 | eMol7273458        | -5.8                     | 3750 | eMol16801545       | -5.8                     |
| 3649: | eMol36016624       | -5.9                     | 3700 | CHEMBL296471       | -5.8                     | 3751 | eMol233065671      | -5.8                     |
| 3650: | eMol4396702        | -5.9                     | 3701 | CHEMBL3805423      | -5.8                     | 3752 | eMol24102744       | -5.8                     |
| 3651: | eMol5444965        | -5.9                     | 3702 | eMol16375283       | -5.8                     | 3753 | eMol25808001       | -5.8                     |
| 3652: | eMol5445015        | -5.9                     | 3703 | eMol16379191       | -5.8                     | 3754 | eMol25810019       | -5.8                     |
| 3653: | CHEMBL2180424      | -5.9                     | 3704 | eMol179165020      | -5.8                     | 3755 | eMol27045477       | -5.8                     |
| 3654: | CHEMBL3417644      | -5.9                     | 3705 | eMol27187196       | -5.8                     | 3756 | eMol27186986       | -5.8                     |
| 3655: | eMol11492617       | -5.9                     | 3706 | eMol27202942       | -5.8                     | 3757 | eMol27187058       | -5.8                     |
| 3656: | eMol11651355       | -5.9                     | 3707 | eMol29272178       | -5.8                     | 3758 | eMol30499969       | -5.8                     |
| 3657: | eMol13457575       | -5.9                     | 3708 | eMol3015060        | -5.8                     | 3759 | eMol32246797       | -5.8                     |
| 3658: | eMol1991716        | -5.9                     | 3709 | eMol36015446       | -5.8                     | 3760 | eMol32259086       | -5.8                     |
| 3659: | eMol2234330        | -5.9                     | 3710 | eMol36016136       | -5.8                     | 3761 | eMol3247755        | -5.8                     |
| 3660: | eMol24116061       | -5.9                     | 3711 | eMol36016418       | -5.8                     | 3762 | eMol3473706        | -5.8                     |
| 3661: | eMol27045573       | -5.9                     | 3712 | eMol36016576       | -5.8                     | 3763 | eMol36015394       | -5.8                     |
| 3662: | eMol27202826       | -5.9                     | 3713 | eMol36016630       | -5.8                     | 3764 | eMol36015628       | -5.8                     |
| 3663: | eMol3060124        | -5.9                     | 3714 | eMol43758409       | -5.8                     | 3765 | eMol36733921       | -5.8                     |
| 3664: | eMol35670746       | -5.9                     | 3715 | eMol566748         | -5.8                     | 3766 | eMol43779178       | -5.8                     |
| 3665: | eMol36015662       | -5.9                     | 3716 | eMol7297616        | -5.8                     | 3767 | eMol4718807        | -5.8                     |
| 3666: | eMol43749023       | -5.9                     | 3717 | eMol8599285        | -5.8                     | 3768 | eMol6844630        | -5.8                     |
| 3667: | eMol45705052       | -5.9                     | 3718 | CHEMBL1412503      | -5.8                     | 3769 | eMol7265596        | -5.8                     |
| 3668: | eMol5444781        | -5.9                     | 3719 | CHEMBL1596292      | -5.8                     | 3770 | eMol7280232        | -5.8                     |
| 3669: | eMol5444941        | -5.9                     | 3720 | CHEMBL3805156      | -5.8                     | 3771 | CHEMBL1386169      | -5.8                     |
| 3670: | eMol560295         | -5.9                     | 3721 | eMol16351969       | -5.8                     | 3772 | CHEMBL1612982      | -5.8                     |
| 3671: | eMol7262416        | -5.9                     | 3722 | eMol17485771       | -5.8                     | 3773 | eMol11910455       | -5.8                     |
| 3672: | eMol7275912        | -5.9                     | 3723 | eMol2330945        | -5.8                     | 3774 | eMol1201944        | -5.8                     |
| 3673: | CHEMBL1349955      | -5.8                     | 3724 | eMol25784525       | -5.8                     | 3775 | eMol16379757       | -5.8                     |
| 3674: | CHEMBL1551011      | -5.8                     | 3725 | eMol27045549       | -5.8                     | 3776 | eMol18837122       | -5.8                     |
| 3675: | CHEMBL298186       | -5.8                     | 3726 | eMol27202372       | -5.8                     | 3777 | eMol2211247        | -5.8                     |
| 3676: | CHEMBL36436        | -5.8                     | 3727 | eMol27202464       | -5.8                     | 3778 | eMol24102224       | -5.8                     |
| 3677: | eMol16056895       | -5.8                     | 3728 | eMol27202824       | -5.8                     | 3779 | eMol25810025       | -5.8                     |
| 3678: | eMol16351863       | -5.8                     | 3729 | eMol279062638      | -5.8                     | 3780 | eMol29946079       | -5.8                     |
| 3679: | eMol16379727       | -5.8                     | 3730 | eMol34126654       | -5.8                     | 3781 | eMol29970678       | -5.8                     |
| 3680: | eMol18567164       | -5.8                     | 3731 | eMol36015418       | -5.8                     | 3782 | eMol32246637       | -5.8                     |
| 3681: | eMol18915564       | -5.8                     | 3732 | eMol36888077       | -5.8                     | 3783 | eMol3243276        | -5.8                     |
| 3682: | eMol20337406       | -5.8                     | 3733 | eMol3707337        | -5.8                     | 3784 | eMol3378047        | -5.8                     |
| 3683: | eMol27349471       | -5.8                     | 3734 | eMol43686098       | -5.8                     | 3785 | eMol36015404       | -5.8                     |
| 3684: | eMol32245395       | -5.8                     | 3735 | eMol4479471        | -5.8                     | 3786 | eMol43692862       | -5.8                     |
| 3685: | eMol34173242       | -5.8                     | 3736 | eMol560051         | -5.8                     | 3787 | eMol43757807       | -5.8                     |
| 3686: | eMol3445274        | -5.8                     | 3737 | eMol579892         | -5.8                     | 3788 | CHEMBL1528422      | -5.8                     |
| 3687: | eMol36015524       | -5.8                     | 3738 | eMol5803186        | -5.8                     | 3789 | CHEMBL2355657      | -5.8                     |
| 3688: | eMol36016276       | -5.8                     | 3739 | eMol8311949        | -5.8                     | 3790 | eMol11949268       | -5.8                     |
| 3689: | eMol36016286       | -5.8                     | 3740 | eMol935358         | -5.8                     | 3791 | eMol16385658       | -5.8                     |
| 3690: | eMol36734015       | -5.8                     | 3741 | ChEBI120532        | -5.8                     | 3792 | eMol17487549       | -5.8                     |
| 3691: | eMol44831971       | -5.8                     | 3742 | CHEMBL1484192      | -5.8                     | 3793 | eMol18899622       | -5.8                     |
| 3692: | eMol5444441        | -5.8                     | 3743 | CHEMBL1501308      | -5.8                     | 3794 | eMol23736354       | -5.8                     |
| 3693: | eMol5444873        | -5.8                     | 3744 | CHEMBL1541968      | -5.8                     | 3795 | eMol24062462       | -5.8                     |
| 3694: | eMol54877800       | -5.8                     | 3745 | CHEMBL44983        | -5.8                     | 3796 | eMol25946128       | -5.8                     |
| 3695: | eMol5538872        | -5.8                     | 3746 | eMol1114360        | -5.8                     | 3797 | eMol289941373      | -5.8                     |
| 3696: | eMol5538874        | -5.8                     | 3747 | eMol11942269       | -5.8                     | 3798 | eMol29272180       | -5.8                     |
| 3697: | eMol624279         | -5.8                     | 3748 | eMol1346671        | -5.8                     | 3799 | eMol3458277        | -5.8                     |
| 3698: | eMol7268950        | -5.8                     | 3749 | eMol1454694        | -5.8                     | 3800 | eMol36015676       | -5.8                     |
| 3669: | eMol5444941        | -5.9                     | 3720 | CHEMBL3805156      | -5.8                     | 3771 | CHEMBL1386169      | -5.8                     |

Table S1. Continued.

| No.   | Compound Name/Code | Docking Score (kcal/mol) | No.   | Compound Name/Code | Docking Score (kcal/mol) | No.   | Compound Name/Code | Docking Score (kcal/mol) |
|-------|--------------------|--------------------------|-------|--------------------|--------------------------|-------|--------------------|--------------------------|
| 3801: | eMol43757795       | -5.8                     | 3852: | eMol3203801        | -5.8                     | 3903: | eMol5444651        | -5.7                     |
| 3802: | eMol4439491        | -5.8                     | 3853: | eMol32867972       | -5.8                     | 3904: | eMol5538230        | -5.7                     |
| 3803: | eMol5444737        | -5.8                     | 3854: | eMol3518209        | -5.8                     | 3905: | eMol5538572        | -5.7                     |
| 3804: | eMol5538750        | -5.8                     | 3855: | eMol36015982       | -5.8                     | 3906: | eMol578940         | -5.7                     |
| 3805: | eMol11897144       | -5.8                     | 3856: | eMol36016550       | -5.8                     | 3907: | eMol8858379        | -5.7                     |
| 3806: | eMol179165023      | -5.8                     | 3857: | eMol36888147       | -5.8                     | 3908: | eMol98677038       | -5.7                     |
| 3807: | eMol18880257       | -5.8                     | 3858: | eMol43224757       | -5.8                     | 3909: | CHEMBL1430145      | -5.7                     |
| 3808: | eMol23016524       | -5.8                     | 3859: | eMol560067         | -5.8                     | 3910: | eMol101341286      | -5.7                     |
| 3809: | eMol24053582       | -5.8                     | 3860: | eMol587732         | -5.8                     | 3911: | eMol16378087       | -5.7                     |
| 3810: | eMol26762435       | -5.8                     | 3861: | eMol7290742        | -5.8                     | 3912: | eMol1748573        | -5.7                     |
| 3811: | eMol36015302       | -5.8                     | 3862: | eMol1456137        | -5.8                     | 3913: | eMol179164950      | -5.7                     |
| 3812: | eMol36015768       | -5.8                     | 3863: | eMol16351587       | -5.8                     | 3914: | eMol24427988       | -5.7                     |
| 3813: | eMol36015964       | -5.8                     | 3864: | eMol16379197       | -5.8                     | 3915: | eMol24538112       | -5.7                     |
| 3814: | eMol42925185       | -5.8                     | 3865: | eMol24428322       | -5.8                     | 3916: | eMol2478254        | -5.7                     |
| 3815: | eMol45932363       | -5.8                     | 3866: | eMol25150648       | -5.8                     | 3917: | eMol26273901       | -5.7                     |
| 3816: | eMol5444833        | -5.8                     | 3867: | eMol27115412       | -5.8                     | 3918: | eMol3389097        | -5.7                     |
| 3817: | eMol560053         | -5.8                     | 3868: | eMol29947096       | -5.8                     | 3919: | eMol3517782        | -5.7                     |
| 3818: | CHEMBL1414275      | -5.8                     | 3869: | eMol3118180        | -5.8                     | 3920: | eMol36016636       | -5.7                     |
| 3819: | CHEMBL46990        | -5.8                     | 3870: | eMol32245479       | -5.8                     | 3921: | eMol36733951       | -5.7                     |
| 3820: | eMol1120516        | -5.8                     | 3871: | eMol32246741       | -5.8                     | 3922: | eMol43709145       | -5.7                     |
| 3821: | eMol1149913        | -5.8                     | 3872: | eMol3473526        | -5.8                     | 3923: | eMol43754301       | -5.7                     |
| 3822: | eMol16379631       | -5.8                     | 3873: | eMol36015738       | -5.8                     | 3924: | eMol43780754       | -5.7                     |
| 3823: | eMol1684016        | -5.8                     | 3874: | eMol36015818       | -5.8                     | 3925: | eMol5444835        | -5.7                     |
| 3824: | eMol177240154      | -5.8                     | 3875: | eMol43777018       | -5.8                     | 3926: | eMol5538900        | -5.7                     |
| 3825: | eMol1996956        | -5.8                     | 3876: | eMol44070271       | -5.8                     | 3927: | eMol555458         | -5.7                     |
| 3826: | eMol26291695       | -5.8                     | 3877: | eMol5527727        | -5.8                     | 3928: | eMol581338         | -5.7                     |
| 3827: | eMol2708943        | -5.8                     | 3878: | eMol5538566        | -5.8                     | 3929: | eMol681870         | -5.7                     |
| 3828: | eMol27485958       | -5.8                     | 3879: | eMol7272094        | -5.8                     | 3930: | CHEMBL1323102      | -5.7                     |
| 3829: | eMol300748351      | -5.8                     | 3880: | CHEMBL299758       | -5.7                     | 3931: | CHEMBL3251274      | -5.7                     |
| 3830: | eMol33328686       | -5.8                     | 3881: | eMol1456572        | -5.7                     | 3932: | CHEMBL3302804      | -5.7                     |
| 3831: | eMol3377803        | -5.8                     | 3882: | eMol15983238       | -5.7                     | 3933: | CHEMBL3417656      | -5.7                     |
| 3832: | eMol3550246        | -5.8                     | 3883: | eMol16378895       | -5.7                     | 3934: | CHEMBL3805990      | -5.7                     |
| 3833: | eMol36015998       | -5.8                     | 3884: | eMol29274406       | -5.7                     | 3935: | eMol11905834       | -5.7                     |
| 3834: | eMol36016402       | -5.8                     | 3885: | eMol29945943       | -5.7                     | 3936: | eMol1201942        | -5.7                     |
| 3835: | eMol36016570       | -5.8                     | 3886: | eMol29987856       | -5.7                     | 3937: | eMol19834537       | -5.7                     |
| 3836: | eMol36734157       | -5.8                     | 3887: | eMol3063065        | -5.7                     | 3938: | eMol2009845        | -5.7                     |
| 3837: | eMol43706397       | -5.8                     | 3888: | eMol316607523      | -5.7                     | 3939: | eMol206994786      | -5.7                     |
| 3838: | eMol4569646        | -5.8                     | 3889: | eMol32246223       | -5.7                     | 3940: | eMol24659537       | -5.7                     |
| 3839: | eMol4769967        | -5.8                     | 3890: | eMol33328746       | -5.7                     | 3941: | eMol25017853       | -5.7                     |
| 3840: | eMol581218         | -5.8                     | 3891: | eMol3453673        | -5.7                     | 3942: | eMol27202858       | -5.7                     |
| 3841: | eMol7707303        | -5.8                     | 3892: | eMol36016288       | -5.7                     | 3943: | eMol276247962      | -5.7                     |
| 3842: | CHEMBL295198       | -5.8                     | 3893: | eMol36888099       | -5.7                     | 3944: | eMol29574834       | -5.7                     |
| 3843: | CHEMBL3805373      | -5.8                     | 3894: | eMol7260540        | -5.7                     | 3945: | eMol300994022      | -5.7                     |
| 3844: | eMol16352275       | -5.8                     | 3895: | CHEMBL1999927      | -5.7                     | 3946: | eMol32245663       | -5.7                     |
| 3845: | eMol16375907       | -5.8                     | 3896: | CHEMBL3417647      | -5.7                     | 3947: | eMol36010097       | -5.7                     |
| 3846: | eMol16379189       | -5.8                     | 3897: | eMol1129158        | -5.7                     | 3948: | eMol36016430       | -5.7                     |
| 3847: | eMol1754894        | -5.8                     | 3898: | eMol16375745       | -5.7                     | 3949: | eMol36016530       | -5.7                     |
| 3848: | eMol19874354       | -5.8                     | 3899: | eMol27187224       | -5.7                     | 3950: | eMol42728099       | -5.7                     |
| 3849: | eMol2490920        | -5.8                     | 3900: | eMol27202940       | -5.7                     | 3951: | eMol43678570       | -5.7                     |
| 3850: | eMol27115418       | -5.8                     | 3901: | eMol3165472        | -5.7                     | 3952: | eMol43747049       | -5.7                     |
| 3851: | eMol3091717        | -5.8                     | 3902: | eMol36015334       | -5.7                     | 3953: | eMol45908565       | -5.7                     |
| 3822: | eMol16379631       | -5.8                     | 3873: | eMol36015738       | -5.8                     | 3924: | eMol43780754       | -5.7                     |

Table S1. Continued.

| No.   | Compound Name/Code | Docking Score (kcal/mol) | No.  | Compound Name/Code | Docking Score (kcal/mol) | No.  | Compound Name/Code | Docking Score (kcal/mol) |
|-------|--------------------|--------------------------|------|--------------------|--------------------------|------|--------------------|--------------------------|
| 3954: | CHEMBL1512259      | -5.7                     | 4005 | eMol36015836       | -5.7                     | 4056 | eMol1266027        | -5.7                     |
| 3955: | eMol11980724       | -5.7                     | 4006 | eMol36015850       | -5.7                     | 4057 | eMol15983254       | -5.7                     |
| 3956: | eMol179165017      | -5.7                     | 4007 | eMol36016436       | -5.7                     | 4058 | eMol16351885       | -5.7                     |
| 3957: | eMol179330987      | -5.7                     | 4008 | eMol44059490       | -5.7                     | 4059 | eMol24080844       | -5.7                     |
| 3958: | eMol2405173        | -5.7                     | 4009 | eMol45789241       | -5.7                     | 4060 | eMol24147635       | -5.7                     |
| 3959: | eMol257850519      | -5.7                     | 4010 | eMol5444653        | -5.7                     | 4061 | eMol2709017        | -5.7                     |
| 3960: | eMol30682572       | -5.7                     | 4011 | eMol5444731        | -5.7                     | 4062 | eMol27182526       | -5.7                     |
| 3961: | eMol31873562       | -5.7                     | 4012 | CHEMBL37887        | -5.7                     | 4063 | eMol29272194       | -5.7                     |
| 3962: | eMol3191734        | -5.7                     | 4013 | CHEMBL3805719      | -5.7                     | 4064 | eMol29956351       | -5.7                     |
| 3963: | eMol4124876        | -5.7                     | 4014 | CHEMBL42510        | -5.7                     | 4065 | eMol32089964       | -5.7                     |
| 3964: | eMol4492362        | -5.7                     | 4015 | CHEMBL44909        | -5.7                     | 4066 | eMol3315429        | -5.7                     |
| 3965: | eMol5444793        | -5.7                     | 4016 | eMol13870135       | -5.7                     | 4067 | eMol3402145        | -5.7                     |
| 3966: | eMol7293790        | -5.7                     | 4017 | eMol16379739       | -5.7                     | 4068 | eMol34147575       | -5.7                     |
| 3967: | eMol98035508       | -5.7                     | 4018 | eMol18936964       | -5.7                     | 4069 | eMol3581283        | -5.7                     |
| 3968: | CHEMBL1413103      | -5.7                     | 4019 | eMol25825133       | -5.7                     | 4070 | eMol3581435        | -5.7                     |
| 3969: | CHEMBL1443164      | -5.7                     | 4020 | eMol26264984       | -5.7                     | 4071 | eMol36015408       | -5.7                     |
| 3970: | CHEMBL1701550      | -5.7                     | 4021 | eMol29963253       | -5.7                     | 4072 | eMol36015966       | -5.7                     |
| 3971: | CHEMBL3251265      | -5.7                     | 4022 | eMol32245227       | -5.7                     | 4073 | eMol36016002       | -5.7                     |
| 3972: | CHEMBL3303952      | -5.7                     | 4023 | eMol32246219       | -5.7                     | 4074 | eMol36016272       | -5.7                     |
| 3973: | CHEMBL3962862      | -5.7                     | 4024 | eMol3314151        | -5.7                     | 4075 | eMol36016600       | -5.7                     |
| 3974: | eMol16379537       | -5.7                     | 4025 | eMol3450783        | -5.7                     | 4076 | eMol5538560        | -5.7                     |
| 3975: | eMol16776762       | -5.7                     | 4026 | eMol36015858       | -5.7                     | 4077 | eMol679756         | -5.7                     |
| 3976: | eMol206992985      | -5.7                     | 4027 | eMol36016000       | -5.7                     | 4078 | CHEMBL3417631      | -5.6                     |
| 3977: | eMol24423982       | -5.7                     | 4028 | eMol36016006       | -5.7                     | 4079 | eMol13396536       | -5.6                     |
| 3978: | eMol25881320       | -5.7                     | 4029 | eMol36016420       | -5.7                     | 4080 | eMol19269633       | -5.6                     |
| 3979: | eMol2666505        | -5.7                     | 4030 | eMol36016616       | -5.7                     | 4081 | eMol24113033       | -5.6                     |
| 3980: | eMol2881396        | -5.7                     | 4031 | eMol36888165       | -5.7                     | 4082 | eMol2588259        | -5.6                     |
| 3981: | eMol31758390       | -5.7                     | 4032 | eMol43747057       | -5.7                     | 4083 | eMol26132226       | -5.6                     |
| 3982: | eMol32245285       | -5.7                     | 4033 | eMol43751241       | -5.7                     | 4084 | eMol300090481      | -5.6                     |
| 3983: | eMol3246420        | -5.7                     | 4034 | eMol43754319       | -5.7                     | 4085 | eMol36016404       | -5.6                     |
| 3984: | eMol32738498       | -5.7                     | 4035 | eMol46563820       | -5.7                     | 4086 | eMol36016426       | -5.6                     |
| 3985: | eMol3323420        | -5.7                     | 4036 | eMol581354         | -5.7                     | 4087 | eMol43731600       | -5.6                     |
| 3986: | eMol3581639        | -5.7                     | 4037 | CHEMBL1408481      | -5.7                     | 4088 | eMol5444643        | -5.6                     |
| 3987: | eMol50316116       | -5.7                     | 4038 | CHEMBL413095       | -5.7                     | 4089 | eMol5444921        | -5.6                     |
| 3988: | eMol5538600        | -5.7                     | 4039 | eMol16379791       | -5.7                     | 4090 | eMol587912         | -5.6                     |
| 3989: | eMol5538748        | -5.7                     | 4040 | eMol1764260        | -5.7                     | 4091 | eMol681846         | -5.6                     |
| 3990: | eMol5803268        | -5.7                     | 4041 | eMol2005049        | -5.7                     | 4092 | eMol6844632        | -5.6                     |
| 3991: | eMol6546341        | -5.7                     | 4042 | eMol3059233        | -5.7                     | 4093 | CHEMBL1299662      | -5.6                     |
| 3992: | eMol670804         | -5.7                     | 4043 | eMol3165424        | -5.7                     | 4094 | CHEMBL3417624      | -5.6                     |
| 3993: | eMol678803         | -5.7                     | 4044 | eMol32245281       | -5.7                     | 4095 | CHEMBL45997        | -5.6                     |
| 3994: | eMol101338165      | -5.7                     | 4045 | eMol36015704       | -5.7                     | 4096 | eMol16351805       | -5.6                     |
| 3995: | eMol11383493       | -5.7                     | 4046 | eMol36015852       | -5.7                     | 4097 | eMol18567168       | -5.6                     |
| 3996: | eMol11689326       | -5.7                     | 4047 | eMol36733943       | -5.7                     | 4098 | eMol24111627       | -5.6                     |
| 3997: | eMol14012794       | -5.7                     | 4048 | eMol3707309        | -5.7                     | 4099 | eMol24428014       | -5.6                     |
| 3998: | eMol16379805       | -5.7                     | 4049 | eMol43692886       | -5.7                     | 4100 | eMol27452042       | -5.6                     |
| 3999: | eMol23989036       | -5.7                     | 4050 | eMol5444927        | -5.7                     | 4101 | eMol27485950       | -5.6                     |
| 4000: | eMol26287348       | -5.7                     | 4051 | eMol565392         | -5.7                     | 4102 | eMol2961107        | -5.6                     |
| 4001: | eMol27115428       | -5.7                     | 4052 | eMol579530         | -5.7                     | 4103 | eMol3063476        | -5.6                     |
| 4002: | eMol27187212       | -5.7                     | 4053 | CHEMBL289053       | -5.7                     | 4104 | eMol3222998        | -5.6                     |
| 4003: | eMol3154639        | -5.7                     | 4054 | CHEMBL398633       | -5.7                     | 4105 | eMol32247631       | -5.6                     |
| 4004: | eMol36015698       | -5.7                     | 4055 | eMol1098662        | -5.7                     | 4106 | eMol3652708        | -5.6                     |
| 3975: | eMol16776762       | -5.7                     | 4026 | eMol36015858       | -5.7                     | 4077 | eMol679756         | -5.7                     |

Table S1. Continued.

| No.  | Compound Name/Code | Docking Score (kcal/mol) | No.  | Compound Name/Code | Docking Score (kcal/mol) | No.  | Compound Name/Code | Docking Score (kcal/mol) |
|------|--------------------|--------------------------|------|--------------------|--------------------------|------|--------------------|--------------------------|
| 4107 | eMol5444825        | -5.6                     | 4158 | eMol5444741        | -5.6                     | 4209 | eMol34117146       | -5.6                     |
| 4108 | eMol5538422        | -5.6                     | 4159 | eMol5444821        | -5.6                     | 4210 | eMol36015370       | -5.6                     |
| 4109 | eMol7276046        | -5.6                     | 4160 | eMol7262778        | -5.6                     | 4211 | eMol36016628       | -5.6                     |
| 4110 | eMol7720322        | -5.6                     | 4161 | eMol936680         | -5.6                     | 4212 | eMol36734039       | -5.6                     |
| 4111 | eMol8227994        | -5.6                     | 4162 | eMol11067809       | -5.6                     | 4213 | eMol43716279       | -5.6                     |
| 4112 | eMol99154804       | -5.6                     | 4163 | eMol13406955       | -5.6                     | 4214 | eMol44027807       | -5.6                     |
| 4113 | CHEMBL1363412      | -5.6                     | 4164 | eMol13856757       | -5.6                     | 4215 | eMol5538274        | -5.6                     |
| 4114 | CHEMBL185819       | -5.6                     | 4165 | eMol15983296       | -5.6                     | 4216 | eMol5538596        | -5.6                     |
| 4115 | CHEMBL298877       | -5.6                     | 4166 | eMol16378849       | -5.6                     | 4217 | eMol561929         | -5.6                     |
| 4116 | CHEMBL3805394      | -5.6                     | 4167 | eMol16387280       | -5.6                     | 4218 | eMol7297548        | -5.6                     |
| 4117 | eMol1035451        | -5.6                     | 4168 | eMol3118142        | -5.6                     | 4219 | CHEMBL1361934      | -5.6                     |
| 4118 | eMol16374525       | -5.6                     | 4169 | eMol3471424        | -5.6                     | 4220 | CHEMBL1409728      | -5.6                     |
| 4119 | eMol17177598       | -5.6                     | 4170 | eMol3531069        | -5.6                     | 4221 | CHEMBL1502873      | -5.6                     |
| 4120 | eMol23985110       | -5.6                     | 4171 | eMol36015660       | -5.6                     | 4222 | CHEMBL287739       | -5.6                     |
| 4121 | eMol34103732       | -5.6                     | 4172 | eMol36016568       | -5.6                     | 4223 | CHEMBL46580        | -5.6                     |
| 4122 | eMol3554360        | -5.6                     | 4173 | eMol5538442        | -5.6                     | 4224 | eMol11071094       | -5.6                     |
| 4123 | eMol36015348       | -5.6                     | 4174 | eMol562339         | -5.6                     | 4225 | eMol16374967       | -5.6                     |
| 4124 | eMol36015412       | -5.6                     | 4175 | CHEMBL1333939      | -5.6                     | 4226 | eMol1755498        | -5.6                     |
| 4125 | eMol36015666       | -5.6                     | 4176 | eMol15961299       | -5.6                     | 4227 | eMol1996958        | -5.6                     |
| 4126 | eMol36016406       | -5.6                     | 4177 | eMol16387194       | -5.6                     | 4228 | eMol2312222        | -5.6                     |
| 4127 | eMol36016414       | -5.6                     | 4178 | eMol3091455        | -5.6                     | 4229 | eMol25936931       | -5.6                     |
| 4128 | eMol5476123        | -5.6                     | 4179 | eMol36016010       | -5.6                     | 4230 | eMol3091595        | -5.6                     |
| 4129 | eMol5538734        | -5.6                     | 4180 | eMol36016434       | -5.6                     | 4231 | eMol3165452        | -5.6                     |
| 4130 | eMol579888         | -5.6                     | 4181 | eMol36016536       | -5.6                     | 4232 | eMol3247843        | -5.6                     |
| 4131 | eMol581332         | -5.6                     | 4182 | eMol53746272       | -5.6                     | 4233 | eMol3252590        | -5.6                     |
| 4132 | eMol98984071       | -5.6                     | 4183 | eMol5444841        | -5.6                     | 4234 | eMol36015332       | -5.6                     |
| 4133 | CHEMBL46221        | -5.6                     | 4184 | eMol561465         | -5.6                     | 4235 | eMol36015708       | -5.6                     |
| 4134 | eMol100505980      | -5.6                     | 4185 | CHEMBL277367       | -5.6                     | 4236 | eMol36016660       | -5.6                     |
| 4135 | eMol11772107       | -5.6                     | 4186 | eMol11665251       | -5.6                     | 4237 | eMol565358         | -5.6                     |
| 4136 | eMol1411602        | -5.6                     | 4187 | eMol11857514       | -5.6                     | 4238 | eMol7274020        | -5.6                     |
| 4137 | eMol16351787       | -5.6                     | 4188 | eMol16379199       | -5.6                     | 4239 | eMol7289486        | -5.6                     |
| 4138 | eMol1681157        | -5.6                     | 4189 | eMol23169915       | -5.6                     | 4240 | CHEMBL1310951      | -5.5                     |
| 4139 | eMol24512694       | -5.6                     | 4190 | eMol27490353       | -5.6                     | 4241 | CHEMBL3192694      | -5.5                     |
| 4140 | eMol27182632       | -5.6                     | 4191 | eMol2992804        | -5.6                     | 4242 | eMol11996719       | -5.5                     |
| 4141 | eMol30248265       | -5.6                     | 4192 | eMol3192660        | -5.6                     | 4243 | eMol16715583       | -5.5                     |
| 4142 | eMol36015996       | -5.6                     | 4193 | eMol36015824       | -5.6                     | 4244 | eMol179164999      | -5.5                     |
| 4143 | eMol36016400       | -5.6                     | 4194 | eMol36015868       | -5.6                     | 4245 | eMol207218450      | -5.5                     |
| 4144 | eMol6120463        | -5.6                     | 4195 | eMol36016048       | -5.6                     | 4246 | eMol24000041       | -5.5                     |
| 4145 | eMol7261208        | -5.6                     | 4196 | eMol5444555        | -5.6                     | 4247 | eMol24659823       | -5.5                     |
| 4146 | eMol11939349       | -5.6                     | 4197 | eMol5444745        | -5.6                     | 4248 | eMol25948294       | -5.5                     |
| 4147 | eMol16379137       | -5.6                     | 4198 | eMol5444823        | -5.6                     | 4249 | eMol26236444       | -5.5                     |
| 4148 | eMol177226996      | -5.6                     | 4199 | eMol588330         | -5.6                     | 4250 | eMol300233846      | -5.5                     |
| 4149 | eMol18917833       | -5.6                     | 4200 | eMol935616         | -5.6                     | 4251 | eMol3394121        | -5.5                     |
| 4150 | eMol189971515      | -5.6                     | 4201 | eMol98750076       | -5.6                     | 4252 | eMol36016028       | -5.5                     |
| 4151 | eMol2277798        | -5.6                     | 4202 | CHEMBL1538079      | -5.6                     | 4253 | eMol36016620       | -5.5                     |
| 4152 | eMol24659539       | -5.6                     | 4203 | eMol1125948        | -5.6                     | 4254 | eMol36888107       | -5.5                     |
| 4153 | eMol2888718        | -5.6                     | 4204 | eMol11942097       | -5.6                     | 4255 | eMol43753923       | -5.5                     |
| 4154 | eMol31758306       | -5.6                     | 4205 | eMol16379641       | -5.6                     | 4256 | eMol4495299        | -5.5                     |
| 4155 | eMol36015682       | -5.6                     | 4206 | eMol24107019       | -5.6                     | 4257 | CHEMBL37758        | -5.5                     |
| 4156 | eMol36016284       | -5.6                     | 4207 | eMol3320388        | -5.6                     | 4258 | eMol1259454        | -5.5                     |
| 4157 | eMol43747097       | -5.6                     | 4208 | eMol3375755        | -5.6                     | 4259 | eMol13444090       | -5.5                     |
| 4128 | eMol5476123        | -5.6                     | 4179 | eMol36016010       | -5.6                     | 4230 | eMol3091595        | -5.6                     |

Table S1. Continued.

| No.   | Compound Name/Code | Docking Score (kcal/mol) | No.  | Compound Name/Code | Docking Score (kcal/mol) | No.  | Compound Name/Code | Docking Score (kcal/mol) |
|-------|--------------------|--------------------------|------|--------------------|--------------------------|------|--------------------|--------------------------|
| 4260: | eMol16656843       | -5.5                     | 4311 | eMol5538580        | -5.5                     | 4362 | CHEMBL108678       | -5.5                     |
| 4261: | eMol16786048       | -5.5                     | 4312 | eMol5829456        | -5.5                     | 4363 | eMol11922227       | -5.5                     |
| 4262: | eMol24117398       | -5.5                     | 4313 | eMol11900836       | -5.5                     | 4364 | eMol16379571       | -5.5                     |
| 4263: | eMol26298847       | -5.5                     | 4314 | eMol13464851       | -5.5                     | 4365 | eMol2466422        | -5.5                     |
| 4264: | eMol27045473       | -5.5                     | 4315 | eMol16274923       | -5.5                     | 4366 | eMol30662258       | -5.5                     |
| 4265: | eMol27485926       | -5.5                     | 4316 | eMol17485889       | -5.5                     | 4367 | eMol32245953       | -5.5                     |
| 4266: | eMol2991951        | -5.5                     | 4317 | eMol1753662        | -5.5                     | 4368 | eMol33328728       | -5.5                     |
| 4267: | eMol3105499        | -5.5                     | 4318 | eMol2399769        | -5.5                     | 4369 | eMol36015664       | -5.5                     |
| 4268: | eMol49047598       | -5.5                     | 4319 | eMol27115434       | -5.5                     | 4370 | eMol36016428       | -5.5                     |
| 4269: | eMol6514227        | -5.5                     | 4320 | eMol30576034       | -5.5                     | 4371 | eMol36016432       | -5.5                     |
| 4270: | eMol7291792        | -5.5                     | 4321 | eMol679702         | -5.5                     | 4372 | eMol36016556       | -5.5                     |
| 4271: | CHEMBL1994932      | -5.5                     | 4322 | eMol7261308        | -5.5                     | 4373 | eMol43745168       | -5.5                     |
| 4272: | CHEMBL2238498      | -5.5                     | 4323 | eMol7281506        | -5.5                     | 4374 | eMol43757693       | -5.5                     |
| 4273: | CHEMBL37829        | -5.5                     | 4324 | eMol7639977        | -5.5                     | 4375 | eMol5444867        | -5.5                     |
| 4274: | eMol16351803       | -5.5                     | 4325 | CHEMBL276947       | -5.5                     | 4376 | eMol7285922        | -5.5                     |
| 4275: | eMol24115063       | -5.5                     | 4326 | CHEMBL3251273      | -5.5                     | 4377 | CHEMBL1583040      | -5.5                     |
| 4276: | eMol317058156      | -5.5                     | 4327 | CHEMBL3304410      | -5.5                     | 4378 | eMol1764760        | -5.5                     |
| 4277: | eMol31758520       | -5.5                     | 4328 | eMol13542776       | -5.5                     | 4379 | eMol25621652       | -5.5                     |
| 4278: | eMol32480666       | -5.5                     | 4329 | eMol26236690       | -5.5                     | 4380 | eMol2992506        | -5.5                     |
| 4279: | eMol36015612       | -5.5                     | 4330 | eMol2992800        | -5.5                     | 4381 | eMol36015382       | -5.5                     |
| 4280: | eMol36015686       | -5.5                     | 4331 | eMol3247471        | -5.5                     | 4382 | eMol36015720       | -5.5                     |
| 4281: | eMol36016408       | -5.5                     | 4332 | eMol3385015        | -5.5                     | 4383 | eMol43754663       | -5.5                     |
| 4282: | eMol5538598        | -5.5                     | 4333 | eMol36015374       | -5.5                     | 4384 | eMol5444327        | -5.5                     |
| 4283: | eMol560297         | -5.5                     | 4334 | eMol4260980        | -5.5                     | 4385 | eMol579954         | -5.5                     |
| 4284: | eMol6514345        | -5.5                     | 4335 | eMol43745020       | -5.5                     | 4386 | eMol587978         | -5.5                     |
| 4285: | eMol695171         | -5.5                     | 4336 | eMol5444341        | -5.5                     | 4387 | eMol7271458        | -5.5                     |
| 4286: | CHEMBL1524621      | -5.5                     | 4337 | eMol5444625        | -5.5                     | 4388 | eMol8267093        | -5.5                     |
| 4287: | CHEMBL3954127      | -5.5                     | 4338 | eMol5444785        | -5.5                     | 4389 | CHEMBL283373       | -5.4                     |
| 4288: | eMol179170445      | -5.5                     | 4339 | eMol6810339        | -5.5                     | 4390 | CHEMBL287914       | -5.4                     |
| 4289: | eMol27202924       | -5.5                     | 4340 | eMol7262724        | -5.5                     | 4391 | CHEMBL3908563      | -5.4                     |
| 4290: | eMol36624923       | -5.5                     | 4341 | CHEMBL3251272      | -5.5                     | 4392 | CHEMBL43067        | -5.4                     |
| 4291: | eMol43692860       | -5.5                     | 4342 | CHEMBL3302444      | -5.5                     | 4393 | eMol2212509        | -5.4                     |
| 4292: | eMol5538490        | -5.5                     | 4343 | eMol11936155       | -5.5                     | 4394 | eMol23982998       | -5.4                     |
| 4293: | eMol5538498        | -5.5                     | 4344 | eMol13998590       | -5.5                     | 4395 | eMol33345106       | -5.4                     |
| 4294: | eMol5538876        | -5.5                     | 4345 | eMol1764882        | -5.5                     | 4396 | eMol36898042       | -5.4                     |
| 4295: | eMol581300         | -5.5                     | 4346 | eMol23625944       | -5.5                     | 4397 | eMol5444787        | -5.4                     |
| 4296: | eMol7277304        | -5.5                     | 4347 | eMol24006861       | -5.5                     | 4398 | CHEMBL1363639      | -5.4                     |
| 4297: | CHEMBL277894       | -5.5                     | 4348 | eMol24432113       | -5.5                     | 4399 | eMol13518872       | -5.4                     |
| 4298: | eMol1120542        | -5.5                     | 4349 | eMol29944972       | -5.5                     | 4400 | eMol13924352       | -5.4                     |
| 4299: | eMol16379651       | -5.5                     | 4350 | eMol3594414        | -5.5                     | 4401 | eMol16782365       | -5.4                     |
| 4300: | eMol2462968        | -5.5                     | 4351 | eMol36015376       | -5.5                     | 4402 | eMol1749616        | -5.4                     |
| 4301: | eMol2477726        | -5.5                     | 4352 | eMol36015648       | -5.5                     | 4403 | eMol24174701       | -5.4                     |
| 4302: | eMol26295378       | -5.5                     | 4353 | eMol36733923       | -5.5                     | 4404 | eMol25656108       | -5.4                     |
| 4303: | eMol27187222       | -5.5                     | 4354 | eMol36733929       | -5.5                     | 4405 | eMol27187262       | -5.4                     |
| 4304: | eMol29274294       | -5.5                     | 4355 | eMol43686126       | -5.5                     | 4406 | eMol32247525       | -5.4                     |
| 4305: | eMol31307202       | -5.5                     | 4356 | eMol43716311       | -5.5                     | 4407 | eMol32247621       | -5.4                     |
| 4306: | eMol36015652       | -5.5                     | 4357 | eMol43754317       | -5.5                     | 4408 | eMol3252534        | -5.4                     |
| 4307: | eMol36016274       | -5.5                     | 4358 | eMol4566462        | -5.5                     | 4409 | eMol36015678       | -5.4                     |
| 4308: | eMol43222155       | -5.5                     | 4359 | eMol5444755        | -5.5                     | 4410 | eMol5444333        | -5.4                     |
| 4309: | eMol43691644       | -5.5                     | 4360 | eMol936264         | -5.5                     | 4411 | eMol5444729        | -5.4                     |
| 4310: | eMol5538280        | -5.5                     | 4361 | eMol99058638       | -5.5                     | 4412 | CHEMBL1582944      | -5.4                     |
| 4281: | eMol36016408       | -5.5                     | 4332 | eMol3385015        | -5.5                     | 4383 | eMol43754663       | -5.5                     |

Table S1. Continued.

| No.   | Compound Name/Code | Docking Score (kcal/mol) | No.   | Compound Name/Code | Docking Score (kcal/mol) | No.   | Compound Name/Code | Docking Score (kcal/mol) |
|-------|--------------------|--------------------------|-------|--------------------|--------------------------|-------|--------------------|--------------------------|
| 4413: | CHEMBL1979224      | -5.4                     | 4464: | eMol587792         | -5.4                     | 4515: | eMol1125956        | -5.3                     |
| 4414: | CHEMBL362906       | -5.4                     | 4465: | eMol16757242       | -5.4                     | 4516: | eMol27045257       | -5.3                     |
| 4415: | eMol1684436        | -5.4                     | 4466: | eMol17485765       | -5.4                     | 4517: | eMol27045263       | -5.3                     |
| 4416: | eMol1830750        | -5.4                     | 4467: | eMol2221159        | -5.4                     | 4518: | eMol3165074        | -5.3                     |
| 4417: | eMol24145924       | -5.4                     | 4468: | eMol23993395       | -5.4                     | 4519: | eMol32246169       | -5.3                     |
| 4418: | eMol26141646       | -5.4                     | 4469: | eMol2493592        | -5.4                     | 4520: | eMol3392027        | -5.3                     |
| 4419: | eMol31653406       | -5.4                     | 4470: | eMol3253524        | -5.4                     | 4521: | eMol48982489       | -5.3                     |
| 4420: | eMol31758546       | -5.4                     | 4471: | eMol36015566       | -5.4                     | 4522: | eMol5444437        | -5.3                     |
| 4421: | eMol3232593        | -5.4                     | 4472: | eMol36016606       | -5.4                     | 4523: | eMol7273880        | -5.3                     |
| 4422: | eMol3376557        | -5.4                     | 4473: | eMol3652688        | -5.4                     | 4524: | ChEBI114898        | -5.3                     |
| 4423: | eMol36015354       | -5.4                     | 4474: | eMol5538576        | -5.4                     | 4525: | CHEMBL1499477      | -5.3                     |
| 4424: | eMol36015750       | -5.4                     | 4475: | eMol15267850       | -5.4                     | 4526: | CHEMBL1902366      | -5.3                     |
| 4425: | eMol36016658       | -5.4                     | 4476: | eMol2992496        | -5.4                     | 4527: | eMol16379689       | -5.3                     |
| 4426: | eMol36016664       | -5.4                     | 4477: | eMol36015638       | -5.4                     | 4528: | eMol1682729        | -5.3                     |
| 4427: | eMol3649917        | -5.4                     | 4478: | eMol36015700       | -5.4                     | 4529: | eMol17485891       | -5.3                     |
| 4428: | eMol43746057       | -5.4                     | 4479: | eMol36016038       | -5.4                     | 4530: | eMol2022679        | -5.3                     |
| 4429: | eMol4594606        | -5.4                     | 4480: | eMol36016562       | -5.4                     | 4531: | eMol2227456        | -5.3                     |
| 4430: | eMol5527725        | -5.4                     | 4481: | eMol36734195       | -5.4                     | 4532: | eMol36015360       | -5.3                     |
| 4431: | eMol5538492        | -5.4                     | 4482: | eMol43744884       | -5.4                     | 4533: | eMol36015932       | -5.3                     |
| 4432: | eMol565570         | -5.4                     | 4483: | eMol4423161        | -5.4                     | 4534: | eMol36015980       | -5.3                     |
| 4433: | eMol7290874        | -5.4                     | 4484: | eMol7287028        | -5.4                     | 4535: | eMol36016682       | -5.3                     |
| 4434: | eMol8066827        | -5.4                     | 4485: | CHEMBL1346627      | -5.4                     | 4536: | eMol684044         | -5.3                     |
| 4435: | CHEMBL2298707      | -5.4                     | 4486: | CHEMBL1387694      | -5.4                     | 4537: | CHEMBL3099880      | -5.3                     |
| 4436: | eMol16370291       | -5.4                     | 4487: | eMol1675470        | -5.4                     | 4538: | eMol1237709        | -5.3                     |
| 4437: | eMol24471123       | -5.4                     | 4488: | eMol1683990        | -5.4                     | 4539: | eMol16809465       | -5.3                     |
| 4438: | eMol2588265        | -5.4                     | 4489: | eMol17487547       | -5.4                     | 4540: | eMol17485449       | -5.3                     |
| 4439: | eMol277677811      | -5.4                     | 4490: | eMol2597902        | -5.4                     | 4541: | eMol18836616       | -5.3                     |
| 4440: | eMol43368571       | -5.4                     | 4491: | eMol27045547       | -5.4                     | 4542: | eMol2010041        | -5.3                     |
| 4441: | eMol5538278        | -5.4                     | 4492: | eMol27485948       | -5.4                     | 4543: | eMol3303379        | -5.3                     |
| 4442: | eMol7297608        | -5.4                     | 4493: | eMol3139546        | -5.4                     | 4544: | eMol3521216        | -5.3                     |
| 4443: | CHEMBL1573972      | -5.4                     | 4494: | eMol31397858       | -5.4                     | 4545: | eMol36015444       | -5.3                     |
| 4444: | eMol11908173       | -5.4                     | 4495: | eMol3393477        | -5.4                     | 4546: | eMol4551419        | -5.3                     |
| 4445: | eMol11943144       | -5.4                     | 4496: | eMol36015834       | -5.4                     | 4547: | eMol5444861        | -5.3                     |
| 4446: | eMol17014756       | -5.4                     | 4497: | eMol36016544       | -5.4                     | 4548: | eMol5538554        | -5.3                     |
| 4447: | eMol27187264       | -5.4                     | 4498: | eMol36016560       | -5.4                     | 4549: | eMol7279368        | -5.3                     |
| 4448: | eMol2889626        | -5.4                     | 4499: | eMol36016588       | -5.4                     | 4550: | CHEMBL3402872      | -5.3                     |
| 4449: | eMol2992808        | -5.4                     | 4500: | CHEMBL3251275      | -5.4                     | 4551: | eMol11935855       | -5.3                     |
| 4450: | eMol3248581        | -5.4                     | 4501: | CHEMBL3303239      | -5.4                     | 4552: | eMol13496736       | -5.3                     |
| 4451: | eMol36015194       | -5.4                     | 4502: | eMol11070671       | -5.4                     | 4553: | eMol32245321       | -5.3                     |
| 4452: | eMol43754741       | -5.4                     | 4503: | eMol16379435       | -5.4                     | 4554: | eMol3239805        | -5.3                     |
| 4453: | eMol15983236       | -5.4                     | 4504: | eMol1993386        | -5.4                     | 4555: | eMol579118         | -5.3                     |
| 4454: | eMol27391996       | -5.4                     | 4505: | eMol27372647       | -5.4                     | 4556: | CHEMBL3443924      | -5.3                     |
| 4455: | eMol2891570        | -5.4                     | 4506: | eMol2992522        | -5.4                     | 4557: | eMol2992834        | -5.3                     |
| 4456: | eMol30576050       | -5.4                     | 4507: | eMol43749015       | -5.4                     | 4558: | eMol30081384       | -5.3                     |
| 4457: | eMol31364087       | -5.4                     | 4508: | eMol44058047       | -5.4                     | 4559: | eMol36015362       | -5.3                     |
| 4458: | eMol31758386       | -5.4                     | 4509: | eMol6779880        | -5.4                     | 4560: | eMol36015380       | -5.3                     |
| 4459: | eMol3426910        | -5.4                     | 4510: | eMol7259888        | -5.4                     | 4561: | eMol36015828       | -5.3                     |
| 4460: | eMol36015378       | -5.4                     | 4511: | CHEMBL1196711      | -5.3                     | 4562: | eMol43753953       | -5.3                     |
| 4461: | eMol36015680       | -5.4                     | 4512: | CHEMBL1424773      | -5.3                     | 4563: | eMol936600         | -5.3                     |
| 4462: | eMol36015830       | -5.4                     | 4513: | CHEMBL557974       | -5.3                     | 4564: | CHEMBL1452604      | -5.3                     |
| 4463: | eMol43731224       | -5.4                     | 4514: | eMol11070944       | -5.3                     | 4565: | eMol27485924       | -5.3                     |
| 4434: | eMol8066827        | -5.4                     | 4485: | CHEMBL1346627      | -5.4                     | 4536: | eMol684044         | -5.3                     |



Table S1. Continued.

| No.   | Compound Name/Code | Docking Score (kcal/mol) | No.   | Compound Name/Code | Docking Score (kcal/mol) | No.  | Compound Name/Code | Docking Score (kcal/mol) |
|-------|--------------------|--------------------------|-------|--------------------|--------------------------|------|--------------------|--------------------------|
| 4566: | eMol34103616       | -5.3                     | 4617  | eMol2002540        | -5.2                     | 4668 | eMol3648258        | -5.2                     |
| 4567: | eMol36016534       | -5.3                     | 4618  | eMol20381014       | -5.2                     | 4669 | eMol43747071       | -5.2                     |
| 4568: | eMol3651748        | -5.3                     | 4619  | eMol2992534        | -5.2                     | 4670 | eMol560063         | -5.2                     |
| 4569: | eMol5538602        | -5.3                     | 4620  | eMol31758600       | -5.2                     | 4671 | eMol587500         | -5.2                     |
| 4570: | eMol566474         | -5.3                     | 4621  | eMol32246589       | -5.2                     | 4672 | eMol6844634        | -5.2                     |
| 4571: | CHEMBL1325614      | -5.3                     | 4622  | eMol36015440       | -5.2                     | 4673 | CHEMBL1365141      | -5.2                     |
| 4572: | CHEMBL3417629      | -5.3                     | 4623  | eMol36016674       | -5.2                     | 4674 | eMol11939763       | -5.2                     |
| 4573: | eMol12034280       | -5.3                     | 4624  | eMol36734167       | -5.2                     | 4675 | eMol13857973       | -5.2                     |
| 4574: | eMol13857885       | -5.3                     | 4625  | eMol5538428        | -5.2                     | 4676 | eMol16679965       | -5.2                     |
| 4575: | eMol30739818       | -5.3                     | 4626  | eMol5538740        | -5.2                     | 4677 | eMol2265196        | -5.2                     |
| 4576: | eMol33341133       | -5.3                     | 4627  | eMol5538868        | -5.2                     | 4678 | eMol2992510        | -5.2                     |
| 4577: | eMol36016656       | -5.3                     | 4628  | eMol679604         | -5.2                     | 4679 | eMol3082150        | -5.2                     |
| 4578: | eMol43686130       | -5.3                     | 4629  | eMol936278         | -5.2                     | 4680 | eMol3254728        | -5.2                     |
| 4579: | eMol5444461        | -5.3                     | 4630: | CHEMBL1495305      | -5.2                     | 4681 | eMol36015816       | -5.2                     |
| 4580: | eMol5444743        | -5.3                     | 4631: | CHEMBL1525394      | -5.2                     | 4682 | eMol36015860       | -5.2                     |
| 4581: | eMol684462         | -5.3                     | 4632  | eMol1372989        | -5.2                     | 4683 | eMol44131054       | -5.2                     |
| 4582: | eMol1415332        | -5.3                     | 4633  | eMol15983294       | -5.2                     | 4684 | eMol5445009        | -5.2                     |
| 4583: | eMol2169394        | -5.3                     | 4634  | eMol16385722       | -5.2                     | 4685 | CHEMBL1336366      | -5.2                     |
| 4584: | eMol27187412       | -5.3                     | 4635  | eMol1676313        | -5.2                     | 4686 | eMol16370277       | -5.2                     |
| 4585: | eMol36015780       | -5.3                     | 4636  | eMol17191180       | -5.2                     | 4687 | eMol16390223       | -5.2                     |
| 4586: | eMol4935076        | -5.3                     | 4637  | eMol36016672       | -5.2                     | 4688 | eMol3115949        | -5.2                     |
| 4587: | eMol5538556        | -5.3                     | 4638  | eMol36619339       | -5.2                     | 4689 | eMol3331199        | -5.2                     |
| 4588: | eMol5538702        | -5.3                     | 4639  | eMol43747041       | -5.2                     | 4690 | eMol36015728       | -5.2                     |
| 4589: | eMol27490291       | -5.3                     | 4640  | eMol4878607        | -5.2                     | 4691 | eMol43789559       | -5.2                     |
| 4590: | eMol3061651        | -5.3                     | 4641  | eMol5444935        | -5.2                     | 4692 | CHEMBL2297261      | -5.2                     |
| 4591: | eMol36015352       | -5.3                     | 4642  | eMol5538754        | -5.2                     | 4693 | eMol1027541        | -5.2                     |
| 4592: | eMol36015724       | -5.3                     | 4643  | eMol9931089        | -5.2                     | 4694 | eMol16379645       | -5.2                     |
| 4593: | eMol36319682       | -5.3                     | 4644  | eMol24113059       | -5.2                     | 4695 | eMol16379767       | -5.2                     |
| 4594: | eMol36733935       | -5.3                     | 4645  | eMol32247521       | -5.2                     | 4696 | eMol27485960       | -5.2                     |
| 4595: | eMol43368191       | -5.3                     | 4646  | eMol3775394        | -5.2                     | 4697 | eMol3177115        | -5.2                     |
| 4596: | eMol43781742       | -5.3                     | 4647  | eMol43744984       | -5.2                     | 4698 | eMol33751194       | -5.2                     |
| 4597: | eMol5538282        | -5.3                     | 4648  | eMol48997350       | -5.2                     | 4699 | eMol36733949       | -5.2                     |
| 4598: | eMol7278884        | -5.3                     | 4649  | eMol5444629        | -5.2                     | 4700 | eMol43013812       | -5.2                     |
| 4599: | CHEMBL1421596      | -5.3                     | 4650  | eMol100986457      | -5.2                     | 4701 | eMol44458391       | -5.2                     |
| 4600: | eMol16387248       | -5.3                     | 4651  | eMol18832597       | -5.2                     | 4702 | eMol579214         | -5.2                     |
| 4601: | eMol16407996       | -5.3                     | 4652  | eMol27492270       | -5.2                     | 4703 | eMol13542782       | -5.2                     |
| 4602: | eMol3037268        | -5.3                     | 4653  | eMol3245754        | -5.2                     | 4704 | eMol1454684        | -5.2                     |
| 4603: | eMol3247263        | -5.3                     | 4654  | eMol3331425        | -5.2                     | 4705 | eMol24083372       | -5.2                     |
| 4604: | eMol43744870       | -5.3                     | 4655  | eMol36015622       | -5.2                     | 4706 | eMol2459471        | -5.2                     |
| 4605: | eMol5444749        | -5.3                     | 4656  | eMol44089932       | -5.2                     | 4707 | eMol3245382        | -5.2                     |
| 4606: | eMol5538772        | -5.3                     | 4657  | eMol4419462        | -5.2                     | 4708 | eMol36015706       | -5.2                     |
| 4607: | eMol1114358        | -5.2                     | 4658  | eMol5538426        | -5.2                     | 4709 | eMol5444395        | -5.2                     |
| 4608: | eMol16379753       | -5.2                     | 4659  | eMol7281382        | -5.2                     | 4710 | eMol588046         | -5.2                     |
| 4609: | eMol3118150        | -5.2                     | 4660: | CHEMBL1503758      | -5.2                     | 4711 | eMol7260062        | -5.2                     |
| 4610: | eMol3418906        | -5.2                     | 4661: | CHEMBL3932469      | -5.2                     | 4712 | eMol7274732        | -5.2                     |
| 4611: | eMol36015536       | -5.2                     | 4662  | eMol11908179       | -5.2                     | 4713 | eMol16379859       | -5.1                     |
| 4612: | eMol36015994       | -5.2                     | 4663  | eMol1674472        | -5.2                     | 4714 | eMol1677693        | -5.1                     |
| 4613: | eMol36016670       | -5.2                     | 4664  | eMol1682797        | -5.2                     | 4715 | eMol24100950       | -5.1                     |
| 4614: | eMol7284830        | -5.2                     | 4665  | eMol3001067        | -5.2                     | 4716 | eMol5785086        | -5.1                     |
| 4615: | eMol16390201       | -5.2                     | 4666  | eMol31758466       | -5.2                     | 4717 | eMol7282482        | -5.1                     |
| 4616: | eMol1678749        | -5.2                     | 4667  | eMol3176687        | -5.2                     | 4718 | eMol98766494       | -5.1                     |
| 4587: | eMol5538556        | -5.3                     | 4638: | eMol36619339       | -5.2                     | 4689 | eMol3331199        | -5.2                     |

Table S1. Continued.

| No.   | Compound Name/Code | Docking Score (kcal/mol) | No.   | Compound Name/Code | Docking Score (kcal/mol) | No.   | Compound Name/Code | Docking Score (kcal/mol) |
|-------|--------------------|--------------------------|-------|--------------------|--------------------------|-------|--------------------|--------------------------|
| 4719: | CHEMBL3942503      | -5.1                     | 4770: | eMol36015624       | -5.1                     | 4821: | eMol1035461        | -5.0                     |
| 4720: | eMol115038         | -5.1                     | 4771: | eMol43747053       | -5.1                     | 4822: | eMol1448879        | -5.0                     |
| 4721: | eMol18813395       | -5.1                     | 4772: | eMol5538342        | -5.1                     | 4823: | eMol179170454      | -5.0                     |
| 4722: | eMol24657929       | -5.1                     | 4773: | eMol624285         | -5.1                     | 4824: | eMol29917277       | -5.0                     |
| 4723: | eMol3380771        | -5.1                     | 4774: | eMol13480687       | -5.1                     | 4825: | eMol3523628        | -5.0                     |
| 4724: | eMol36010363       | -5.1                     | 4775: | eMol29917279       | -5.1                     | 4826: | eMol5538888        | -5.0                     |
| 4725: | eMol7291634        | -5.1                     | 4776: | eMol3059181        | -5.1                     | 4827: | eMol16379829       | -5.0                     |
| 4726: | CHEMBL3251277      | -5.1                     | 4777: | eMol49213685       | -5.1                     | 4828: | eMol23996477       | -5.0                     |
| 4727: | CHEMBL3302547      | -5.1                     | 4778: | eMol5538756        | -5.1                     | 4829: | eMol3032190        | -5.0                     |
| 4728: | eMol15983244       | -5.1                     | 4779: | CHEMBL43621        | -5.1                     | 4830: | eMol3200820        | -5.0                     |
| 4729: | eMol32246675       | -5.1                     | 4780: | eMol11821373       | -5.1                     | 4831: | eMol36016668       | -5.0                     |
| 4730: | eMol3245798        | -5.1                     | 4781: | eMol23999589       | -5.1                     | 4832: | eMol48304474       | -5.0                     |
| 4731: | eMol3523620        | -5.1                     | 4782: | eMol2709467        | -5.1                     | 4833: | eMol13512590       | -5.0                     |
| 4732: | eMol3648256        | -5.1                     | 4783: | eMol3249517        | -5.1                     | 4834: | eMol29274280       | -5.0                     |
| 4733: | eMol50319429       | -5.1                     | 4784: | eMol34126726       | -5.1                     | 4835: | eMol43754827       | -5.0                     |
| 4734: | eMol5538276        | -5.1                     | 4785: | eMol3480399        | -5.1                     | 4836: | eMol44073147       | -5.0                     |
| 4735: | eMol8455240        | -5.1                     | 4786: | eMol3503186        | -5.1                     | 4837: | eMol3493996        | -5.0                     |
| 4736: | eMol1319937        | -5.1                     | 4787: | eMol36015986       | -5.1                     | 4838: | eMol36015336       | -5.0                     |
| 4737: | eMol3048384        | -5.1                     | 4788: | eMol43744964       | -5.1                     | 4839: | eMol36015782       | -5.0                     |
| 4738: | eMol32245889       | -5.1                     | 4789: | eMol11864402       | -5.0                     | 4840: | eMol3648252        | -5.0                     |
| 4739: | eMol36016618       | -5.1                     | 4790: | eMol3112215        | -5.0                     | 4841: | eMol2409053        | -5.0                     |
| 4740: | eMol43745176       | -5.1                     | 4791: | eMol31758416       | -5.0                     | 4842: | eMol27485956       | -5.0                     |
| 4741: | eMol23999013       | -5.1                     | 4792: | eMol32247467       | -5.0                     | 4843: | eMol29917275       | -5.0                     |
| 4742: | eMol2992486        | -5.1                     | 4793: | eMol36016130       | -5.0                     | 4844: | eMol33342600       | -5.0                     |
| 4743: | eMol3214250        | -5.1                     | 4794: | eMol43013800       | -5.0                     | 4845: | eMol9959049        | -5.0                     |
| 4744: | eMol32246429       | -5.1                     | 4795: | eMol43743404       | -5.0                     | 4846: | CHEMBL1543282      | -4.9                     |
| 4745: | eMol3652086        | -5.1                     | 4796: | eMol76019788       | -5.0                     | 4847: | eMol1454660        | -4.9                     |
| 4746: | eMol5444397        | -5.1                     | 4797: | CHEMBL1976112      | -5.0                     | 4848: | eMol34206915       | -4.9                     |
| 4747: | eMol6833538        | -5.1                     | 4798: | CHEMBL601797       | -5.0                     | 4849: | eMol3658197        | -4.9                     |
| 4748: | eMol7283790        | -5.1                     | 4799: | eMol17014760       | -5.0                     | 4850: | eMol29645389       | -4.9                     |
| 4749: | CHEMBL1351050      | -5.1                     | 4800: | eMol2001487        | -5.0                     | 4851: | eMol43013872       | -4.9                     |
| 4750: | eMol13520613       | -5.1                     | 4801: | eMol3091469        | -5.0                     | 4852: | eMol44080938       | -4.9                     |
| 4751: | eMol31758260       | -5.1                     | 4802: | eMol3376021        | -5.0                     | 4853: | eMol5538486        | -4.9                     |
| 4752: | eMol3252718        | -5.1                     | 4803: | CHEMBL1388432      | -5.0                     | 4854: | CHEMBL1386751      | -4.9                     |
| 4753: | eMol3523624        | -5.1                     | 4804: | eMol16385660       | -5.0                     | 4855: | CHEMBL1701256      | -4.9                     |
| 4754: | eMol43780908       | -5.1                     | 4805: | eMol2889322        | -5.0                     | 4856: | eMol17487551       | -4.9                     |
| 4755: | eMol4422602        | -5.1                     | 4806: | eMol2992528        | -5.0                     | 4857: | eMol2881728        | -4.9                     |
| 4756: | eMol4459106        | -5.1                     | 4807: | eMol36015500       | -5.0                     | 4858: | eMol32236794       | -4.9                     |
| 4757: | eMol6833971        | -5.1                     | 4808: | eMol36016528       | -5.0                     | 4859: | eMol5444551        | -4.9                     |
| 4758: | eMol13539183       | -5.1                     | 4809: | eMol16379787       | -5.0                     | 4860: | eMol15089032       | -4.9                     |
| 4759: | eMol2167461        | -5.1                     | 4810: | eMol31364085       | -5.0                     | 4861: | eMol36898088       | -4.9                     |
| 4760: | eMol3651756        | -5.1                     | 4811: | eMol32246255       | -5.0                     | 4862: | eMol43730460       | -4.9                     |
| 4761: | eMol5538438        | -5.1                     | 4812: | eMol43691630       | -5.0                     | 4863: | eMol5444447        | -4.9                     |
| 4762: | eMol5538742        | -5.1                     | 4813: | eMol4904340        | -5.0                     | 4864: | eMol5444733        | -4.9                     |
| 4763: | eMol11465601       | -5.1                     | 4814: | CHEMBL1500721      | -5.0                     | 4865: | eMol587738         | -4.9                     |
| 4764: | eMol16813507       | -5.1                     | 4815: | CHEMBL3919247      | -5.0                     | 4866: | CHEMBL3910321      | -4.9                     |
| 4765: | eMol2264316        | -5.1                     | 4816: | eMol11329944       | -5.0                     | 4867: | eMol31653504       | -4.9                     |
| 4766: | eMol316832342      | -5.1                     | 4817: | eMol17014768       | -5.0                     | 4868: | eMol32246579       | -4.9                     |
| 4767: | eMol32246257       | -5.1                     | 4818: | eMol18922892       | -5.0                     | 4869: | eMol36015636       | -4.9                     |
| 4768: | eMol33380364       | -5.1                     | 4819: | eMol43746043       | -5.0                     | 4870: | eMol36016146       | -4.9                     |
| 4769: | eMol36015504       | -5.1                     | 4820: | CHEMBL1452793      | -5.0                     | 4871: | eMol50340675       | -4.9                     |
| 4740: | eMol43745176       | -5.1                     | 4791: | eMol31758416       | -5.0                     | 4842: | eMol27485956       | -5.0                     |

Table S1. *Continued.*

| No.  | Compound Name/Code | Docking Score (kcal/mol) | No.  | Compound Name/Code | Docking Score (kcal/mol) | No.  | Compound Name/Code | Docking Score (kcal/mol) |
|------|--------------------|--------------------------|------|--------------------|--------------------------|------|--------------------|--------------------------|
| 4872 | eMol5514743        | -4.9                     | 4915 | eMol7276588        | -4.8                     | 4958 | eMol2048663        | -4.6                     |
| 4873 | eMol29942864       | -4.9                     | 4916 | eMol36733899       | -4.8                     | 4959 | eMol36015726       | -4.6                     |
| 4874 | eMol36015626       | -4.9                     | 4917 | CHEMBL1313582      | -4.8                     | 4960 | eMol11952112       | -4.6                     |
| 4875 | eMol36016008       | -4.9                     | 4918 | eMol3048390        | -4.8                     | 4961 | eMol16379883       | -4.5                     |
| 4876 | eMol36887773       | -4.9                     | 4919 | eMol5444751        | -4.8                     | 4962 | eMol43691660       | -4.5                     |
| 4877 | eMol43747101       | -4.9                     | 4920 | eMol5538494        | -4.8                     | 4963 | eMol5538884        | -4.5                     |
| 4878 | eMol98058053       | -4.9                     | 4921 | eMol5538738        | -4.8                     | 4964 | eMol24006030       | -4.5                     |
| 4879 | eMol36015732       | -4.9                     | 4922 | eMol560365         | -4.8                     | 4965 | eMol1676695        | -4.5                     |
| 4880 | eMol43757853       | -4.9                     | 4923 | CHEMBL1311188      | -4.8                     | 4966 | eMol36015856       | -4.5                     |
| 4881 | eMol11681118       | -4.9                     | 4924 | eMol2992480        | -4.8                     | 4967 | eMol8238421        | -4.5                     |
| 4882 | eMol16379853       | -4.9                     | 4925 | eMol1684765        | -4.7                     | 4968 | eMol1178884        | -4.5                     |
| 4883 | eMol2501901        | -4.9                     | 4926 | eMol3145070        | -4.7                     | 4969 | eMol27348310       | -4.5                     |
| 4884 | eMol2992824        | -4.9                     | 4927 | eMol3512950        | -4.7                     | 4970 | eMol1266023        | -4.5                     |
| 4885 | eMol32245269       | -4.9                     | 4928 | eMol11747245       | -4.7                     | 4971 | eMol5538892        | -4.5                     |
| 4886 | eMol679700         | -4.9                     | 4929 | eMol17014766       | -4.7                     | 4972 | eMol32246633       | -4.4                     |
| 4887 | eMol24110832       | -4.8                     | 4930 | eMol16799937       | -4.7                     | 4973 | eMol29274282       | -4.4                     |
| 4888 | eMol31758564       | -4.8                     | 4931 | eMol30288722       | -4.7                     | 4974 | eMol43415245       | -4.4                     |
| 4889 | eMol32245319       | -4.8                     | 4932 | eMol32246207       | -4.7                     | 4975 | eMol48312056       | -4.4                     |
| 4890 | eMol32247457       | -4.8                     | 4933 | eMol1454680        | -4.7                     | 4976 | eMol5785084        | -4.4                     |
| 4891 | eMol3419044        | -4.8                     | 4934 | eMol16378089       | -4.7                     | 4977 | eMol43746069       | -4.4                     |
| 4892 | eMol5514745        | -4.8                     | 4935 | eMol5444411        | -4.7                     | 4978 | eMol30647010       | -4.3                     |
| 4902 | eMol4448867        | -4.8                     | 4945 | CHEMBL1406150      | -4.6                     | 4988 | eMol17199912       | -4.2                     |
| 4903 | eMol5444829        | -4.8                     | 4946 | eMol1114366        | -4.6                     | 4989 | CHEMBL3928151      | -4.1                     |
| 4904 | eMol5444859        | -4.8                     | 4947 | eMol16378097       | -4.6                     | 4990 | CHEMBL1525899      | -4.1                     |
| 4905 | eMol29274296       | -4.8                     | 4948 | eMol3254458        | -4.6                     | 4991 | eMol1471822        | -4.1                     |
| 4906 | eMol5538890        | -4.8                     | 4949 | eMol3473340        | -4.6                     | 4992 | eMol32247517       | -4.0                     |
| 4907 | eMol98068785       | -4.8                     | 4950 | eMol3652896        | -4.6                     | 4993 | CHEMBL3194843      | -4.0                     |
| 4908 | eMol3257328        | -4.8                     | 4951 | eMol5538910        | -4.6                     | 4994 | eMol1023917        | -4.0                     |
| 4909 | eMol33316910       | -4.8                     | 4952 | eMol13469491       | -4.6                     | 4995 | eMol207114346      | -4.0                     |
| 4910 | eMol36016680       | -4.8                     | 4953 | eMol27492328       | -4.6                     | 4996 | eMol36015960       | -4.0                     |
| 4911 | eMol3710762        | -4.8                     | 4954 | eMol44548742       | -4.6                     | 4997 | eMol5785216        | -4.0                     |
| 4912 | eMol43759025       | -4.8                     | 4955 | eMol5538894        | -4.6                     | 4998 | eMol36731517       | -3.9                     |
| 4913 | eMol5444435        | -4.8                     | 4956 | eMol5444403        | -4.6                     | 4999 | eMol13803787       | -3.8                     |
| 4914 | eMol5538246        | -4.8                     | 4957 | eMol43789551       | -4.6                     | 5000 | eMol31758544       | -3.7                     |

<sup>a</sup> Duplicated compounds with identical InChKey could be observed.

**Table S2.** Estimated conventional and intermediate docking scores (in kcal/mol) for QNZ and the top 1000 potent allosteric inhibitors against mutated PBP2a allosteric site in acidic medium.<sup>a</sup>

| No. | Compound Name/Code | Docking score (kcal/mol) |              | No. | Compound Name/Code | Docking score (kcal/mol) |              |
|-----|--------------------|--------------------------|--------------|-----|--------------------|--------------------------|--------------|
|     |                    | Conventional             | Intermediate |     |                    | Conventional             | Intermediate |
|     | QNZ                | -6.9                     | -8.0         | 50  | eMol22447774       | -8.5                     | -8.7         |
| 1   | eMol19266609       | -7.9                     | -9.5         | 51  | eMol19076742       | -8.6                     | -8.7         |
| 2   | eMol24519694       | -9.0                     | -9.5         | 52  | CHEMBL1215650      | -8.5                     | -8.7         |
| 3   | eMol26313117       | -8.9                     | -9.4         | 53  | CHEMBL1579061      | -8.5                     | -8.7         |
| 4   | eMol24389393       | -7.9                     | -9.4         | 54  | eMol26269394       | -8.5                     | -8.7         |
| 5   | CHEMBL1214717      | -9.4                     | -9.4         | 55  | eMol31781482       | -8.7                     | -8.6         |
| 6   | eMol29587310       | -9.4                     | -9.4         | 56  | eMol23157132       | -8.4                     | -8.6         |
| 7   | eMol45585846       | -9.4                     | -9.4         | 57  | CHEMBL1215649      | -8.5                     | -8.6         |
| 8   | eMol23239806       | -9.3                     | -9.4         | 58  | eMol26196316       | -8.5                     | -8.6         |
| 9   | CHEMBL1214718      | -9.2                     | -9.3         | 59  | eMol30646140       | -7.7                     | -8.6         |
| 10  | eMol29597031       | -9.2                     | -9.3         | 60  | eMol72993476       | -7.7                     | -8.6         |
| 11  | eMol31786896       | -8.4                     | -9.3         | 61  | CHEMBL3818129      | -8.5                     | -8.6         |
| 12  | eMol45585848       | -9.2                     | -9.3         | 62  | eMol26319231       | -8.2                     | -8.6         |
| 13  | eMol23186178       | -9.1                     | -9.3         | 63  | eMol300994534      | -8.4                     | -8.6         |
| 14  | eMol2403964        | -8.7                     | -9.3         | 64  | eMol48938145       | -8.4                     | -8.6         |
| 15  | eMol19076714       | -8.4                     | -9.2         | 65  | CHEMBL1214713      | -8.2                     | -8.6         |
| 16  | eMol31297102       | -7.9                     | -9.2         | 66  | CHEMBL1384683      | -8.2                     | -8.6         |
| 17  | eMol26293960       | -8.1                     | -9.2         | 67  | eMol26270654       | -8.2                     | -8.6         |
| 18  | eMol19076718       | -8.9                     | -9.1         | 68  | eMol29633913       | -7.8                     | -8.6         |
| 19  | CHEMBL1534883      | -9.0                     | -9.1         | 69  | eMol33366267       | -7.9                     | -8.6         |
| 20  | eMol1344114        | -9.0                     | -9.1         | 70  | eMol45622743       | -7.8                     | -8.6         |
| 21  | eMol18542844       | -9.1                     | -9.1         | 71  | eMol75958504       | -7.9                     | -8.6         |
| 22  | CHEMBL3819187      | -7.8                     | -9.1         | 72  | eMol23246696       | -8.5                     | -8.6         |
| 23  | eMol30323633       | -9.0                     | -9.1         | 73  | CHEMBL1558437      | -8.2                     | -8.6         |
| 24  | CHEMBL1214794      | -8.9                     | -9.0         | 74  | eMol26242050       | -8.1                     | -8.6         |
| 25  | eMol26196290       | -8.9                     | -9.0         | 75  | eMol30671942       | -7.9                     | -8.5         |
| 26  | eMol45585824       | -8.9                     | -9.0         | 76  | eMol26242034       | -8.2                     | -8.5         |
| 27  | CHEMBL1214938      | -8.7                     | -9.0         | 77  | eMol26242042       | -7.6                     | -8.5         |
| 28  | eMol20375178       | -8.7                     | -9.0         | 78  | eMol23175530       | -8.3                     | -8.5         |
| 29  | eMol30323569       | -8.6                     | -9.0         | 79  | CHEMBL3805924      | -8.3                     | -8.5         |
| 30  | CHEMBL3818732      | -8.0                     | -9.0         | 80  | CHEMBL4103504      | -8.3                     | -8.5         |
| 31  | eMol30341049       | -8.8                     | -8.9         | 81  | eMol24428240       | -7.2                     | -8.5         |
| 32  | eMol43906045       | -8.8                     | -8.9         | 82  | eMol24519844       | -8.4                     | -8.5         |
| 33  | eMol26437582       | -8.2                     | -8.9         | 83  | eMol23181799       | -8.3                     | -8.4         |
| 34  | eMol19076712       | -8.9                     | -8.9         | 84  | eMol26242044       | -8.3                     | -8.4         |
| 35  | eMol20378769       | -8.7                     | -8.9         | 85  | eMol579568         | -8.4                     | -8.4         |
| 36  | CHEMBL3818584      | -8.3                     | -8.9         | 86  | eMol23239141       | -8.3                     | -8.4         |
| 37  | eMol3021959        | -7.1                     | -8.9         | 87  | CHEMBL1215080      | -8.4                     | -8.4         |
| 38  | eMol18542846       | -8.8                     | -8.8         | 88  | eMol23243407       | -8.2                     | -8.4         |
| 39  | eMol20342262       | -7.9                     | -8.8         | 89  | eMol43906059       | -8.4                     | -8.4         |
| 40  | eMol1166007        | -8.7                     | -8.8         | 90  | eMol587826         | -8.2                     | -8.4         |
| 41  | eMol26242018       | -8.0                     | -8.8         | 91  | eMol588192         | -8.2                     | -8.4         |
| 42  | eMol19076754       | -8.6                     | -8.8         | 92  | eMol25810077       | -7.9                     | -8.4         |
| 43  | eMol20337486       | -8.8                     | -8.8         | 93  | eMol27202240       | -8.4                     | -8.4         |
| 44  | eMol20379909       | -8.8                     | -8.8         | 94  | eMol679826         | -8.3                     | -8.4         |
| 45  | CHEMBL1215648      | -8.6                     | -8.7         | 95  | CHEMBL3818035      | -7.9                     | -8.4         |
| 46  | eMol26196326       | -8.6                     | -8.7         | 96  | eMol36912832       | -7.9                     | -8.4         |
| 47  | eMol45585842       | -8.6                     | -8.7         | 97  | eMol43906055       | -8.0                     | -8.4         |
| 48  | eMol23241028       | -8.6                     | -8.7         | 98  | eMol18962382       | -8.4                     | -8.4         |
| 49  | eMol23190351       | -7.9                     | -8.7         | 99  | eMol27202910       | -8.3                     | -8.4         |

Table S2. *Continued.*

| No. | Compound Name/Code | Docking score (kcal/mol) |              | No. | Compound Name/Code | Docking score (kcal/mol) |              |
|-----|--------------------|--------------------------|--------------|-----|--------------------|--------------------------|--------------|
|     |                    | Conventional             | Intermediate |     |                    | Conventional             | Intermediate |
| 100 | eMol31532412       | -8.3                     | -8.4         | 152 | eMol681936         | -8.2                     | -8.2         |
| 101 | eMol25810075       | -8.3                     | -8.4         | 153 | CHEMBL508966       | -8.1                     | -8.2         |
| 102 | eMol26264570       | -8.1                     | -8.4         | 154 | eMol1755402        | -8.0                     | -8.2         |
| 103 | eMol26313223       | -8.3                     | -8.4         | 155 | eMol24530483       | -8.2                     | -8.2         |
| 104 | eMol30248263       | -8.0                     | -8.4         | 156 | eMol26242038       | -7.9                     | -8.2         |
| 105 | CHEMBL1214647      | -8.1                     | -8.4         | 157 | eMol26320021       | -7.4                     | -8.2         |
| 106 | eMol679820         | -7.2                     | -8.4         | 158 | eMol566488         | -8.1                     | -8.2         |
| 107 | CHEMBL1215003      | -8.2                     | -8.3         | 159 | CHEMBL1215578      | -8.0                     | -8.2         |
| 108 | CHEMBL3817888      | -8.1                     | -8.3         | 160 | CHEMBL3818775      | -8.2                     | -8.2         |
| 109 | eMol193446288      | -8.3                     | -8.3         | 161 | eMol27252412       | -8.1                     | -8.2         |
| 110 | eMol27202248       | -8.4                     | -8.3         | 162 | eMol299980544      | -8.2                     | -8.2         |
| 111 | eMol43906053       | -8.2                     | -8.3         | 163 | eMol679822         | -8.0                     | -8.2         |
| 112 | CHEMBL3818572      | -8.0                     | -8.3         | 164 | eMol956623         | -8.2                     | -8.2         |
| 113 | CHEMBL395193       | -8.3                     | -8.3         | 165 | eMol11920256       | -8.1                     | -8.2         |
| 114 | eMol18542848       | -8.3                     | -8.3         | 166 | eMol23178762       | -8.1                     | -8.2         |
| 115 | eMol2992792        | -8.1                     | -8.3         | 167 | eMol48982653       | -7.7                     | -8.2         |
| 116 | eMol6263471        | -8.2                     | -8.3         | 168 | CHEMBL1215797      | -8.0                     | -8.2         |
| 117 | eMol26242022       | -7.9                     | -8.3         | 169 | eMol18550846       | -8.1                     | -8.2         |
| 118 | eMol43731476       | -7.6                     | -8.3         | 170 | eMol20377597       | -8.0                     | -8.2         |
| 119 | eMol46480173       | -8.2                     | -8.3         | 171 | eMol4566508        | -7.3                     | -8.2         |
| 120 | eMol19076598       | -7.3                     | -8.3         | 172 | eMol26314779       | -8.1                     | -8.2         |
| 121 | eMol20347873       | -8.2                     | -8.3         | 173 | eMol4558540        | -8.0                     | -8.2         |
| 122 | eMol206926236      | -8.2                     | -8.3         | 174 | CHEMBL3819481      | -7.9                     | -8.2         |
| 123 | eMol300094331      | -8.2                     | -8.3         | 175 | eMol20368046       | -8.1                     | -8.2         |
| 124 | eMol300154219      | -7.3                     | -8.3         | 176 | eMol23147497       | -8.1                     | -8.2         |
| 125 | eMol25810083       | -8.3                     | -8.3         | 177 | eMol26330545       | -8.2                     | -8.2         |
| 126 | eMol26242032       | -7.9                     | -8.3         | 178 | eMol29565259       | -7.8                     | -8.2         |
| 127 | eMol25810071       | -8.3                     | -8.3         | 179 | eMol45585838       | -7.8                     | -8.2         |
| 128 | eMol46365626       | -8.2                     | -8.3         | 180 | eMol679824         | -8.0                     | -8.2         |
| 129 | eMol566574         | -8.1                     | -8.3         | 181 | CHEMBL1214648      | -8.0                     | -8.2         |
| 130 | eMol27406062       | -7.8                     | -8.3         | 182 | CHEMBL1215004      | -7.7                     | -8.2         |
| 131 | CHEMBL1214935      | -8.1                     | -8.3         | 183 | eMol26242024       | -7.7                     | -8.2         |
| 132 | CHEMBL3818929      | -8.2                     | -8.3         | 184 | eMol26242026       | -7.8                     | -8.2         |
| 133 | CHEMBL518358       | -8.2                     | -8.3         | 185 | eMol26242052       | -7.3                     | -8.2         |
| 134 | eMol43906051       | -8.1                     | -8.3         | 186 | eMol29587306       | -7.7                     | -8.2         |
| 135 | CHEMBL1214936      | -8.2                     | -8.3         | 187 | eMol45585836       | -7.7                     | -8.2         |
| 136 | eMol26196312       | -8.2                     | -8.3         | 188 | eMol679556         | -8.0                     | -8.2         |
| 137 | eMol26314331       | -7.5                     | -8.3         | 189 | CHEMBL3582082      | -7.3                     | -8.1         |
| 138 | eMol30017880       | -7.4                     | -8.3         | 190 | eMol20361212       | -8.1                     | -8.1         |
| 139 | eMol45585832       | -8.2                     | -8.3         | 191 | eMol37002179       | -7.4                     | -8.1         |
| 140 | eMol25819217       | -8.3                     | -8.2         | 192 | eMol4562556        | -8.1                     | -8.1         |
| 141 | eMol26809774       | -8.2                     | -8.2         | 193 | eMol4578697        | -7.3                     | -8.1         |
| 142 | eMol27202258       | -8.3                     | -8.2         | 194 | eMol45935562       | -7.5                     | -8.1         |
| 143 | eMol46490873       | -8.1                     | -8.2         | 195 | eMol565850         | -7.0                     | -8.1         |
| 144 | eMol26314565       | -8.2                     | -8.2         | 196 | CHEMBL1601398      | -8.0                     | -8.1         |
| 145 | eMol1088331        | -8.2                     | -8.2         | 197 | CHEMBL3582080      | -7.9                     | -8.1         |
| 146 | eMol13856171       | -8.0                     | -8.2         | 198 | eMol2507718        | -8.0                     | -8.1         |
| 147 | eMol29653471       | -8.2                     | -8.2         | 199 | eMol256911679      | -8.0                     | -8.1         |
| 148 | eMol30323345       | -9.8                     | -8.2         | 200 | eMol27202348       | -8.1                     | -8.1         |
| 149 | eMol43731530       | -7.3                     | -8.2         | 201 | eMol301527162      | -8.0                     | -8.1         |
| 150 | eMol45622745       | -8.2                     | -8.2         | 202 | eMol4518648        | -8.1                     | -8.1         |
| 151 | eMol46480165       | -8.2                     | -8.2         | 203 | eMol4552519        | -8.0                     | -8.1         |

Table S2. *Continued.*

| No. | Compound Name/Code | Docking score (kcal/mol) |              | No. | Compound Name/Code | Docking score (kcal/mol) |              |
|-----|--------------------|--------------------------|--------------|-----|--------------------|--------------------------|--------------|
|     |                    | Conventional             | Intermediate |     |                    | Conventional             | Intermediate |
| 204 | eMol4446697        | -7.7                     | -8.1         | 256 | eMol25810089       | -8.0                     | -8.0         |
| 205 | eMol4577396        | -8.0                     | -8.1         | 257 | eMol26242040       | -7.8                     | -8.0         |
| 206 | eMol177199339      | -7.9                     | -8.1         | 258 | eMol26242048       | -7.6                     | -8.0         |
| 207 | eMol27202252       | -8.0                     | -8.1         | 259 | eMol26309353       | -7.9                     | -8.0         |
| 208 | eMol300994251      | -7.9                     | -8.1         | 260 | eMol4381378        | -7.9                     | -8.0         |
| 209 | eMol36912834       | -8.0                     | -8.1         | 261 | eMol4581546        | -7.8                     | -8.0         |
| 210 | eMol48768479       | -7.9                     | -8.1         | 262 | eMol50556474       | -7.5                     | -8.0         |
| 211 | eMol579756         | -8.0                     | -8.1         | 263 | CHEMBL2259942      | -7.8                     | -8.0         |
| 212 | eMol580072         | -8.0                     | -8.1         | 264 | CHEMBL3819363      | -7.4                     | -8.0         |
| 213 | eMol4566756        | -7.9                     | -8.1         | 265 | eMol26311024       | -7.7                     | -8.0         |
| 214 | eMol27202760       | -8.0                     | -8.1         | 266 | eMol43757885       | -7.6                     | -8.0         |
| 215 | eMol27202916       | -7.2                     | -8.1         | 267 | eMol679670         | -8.0                     | -8.0         |
| 216 | eMol29634797       | -7.6                     | -8.1         | 268 | CHEMBL1632342      | -7.2                     | -8.0         |
| 217 | CHEMBL1214941      | -8.6                     | -8.1         | 269 | eMol206910852      | -7.9                     | -8.0         |
| 218 | eMol25784531       | -7.1                     | -8.1         | 270 | eMol233046940      | -7.7                     | -8.0         |
| 219 | eMol27091674       | -8.0                     | -8.1         | 271 | eMol26313085       | -7.5                     | -8.0         |
| 220 | eMol679550         | -7.9                     | -8.1         | 272 | eMol46363574       | -7.9                     | -8.0         |
| 221 | CHEMBL1443074      | -8.0                     | -8.1         | 273 | eMol679552         | -7.9                     | -8.0         |
| 222 | eMol18940433       | -8.0                     | -8.1         | 274 | CHEMBL3818377      | -8.4                     | -8.0         |
| 223 | eMol27091498       | -8.0                     | -8.1         | 275 | eMol206911267      | -7.9                     | -8.0         |
| 224 | eMol20378767       | -7.9                     | -8.1         | 276 | eMol46480254       | -7.9                     | -8.0         |
| 225 | eMol27091442       | -7.9                     | -8.1         | 277 | eMol679664         | -8.0                     | -8.0         |
| 226 | eMol565798         | -8.1                     | -8.1         | 278 | eMol26263266       | -7.0                     | -7.9         |
| 227 | eMol29638777       | -7.8                     | -8.1         | 280 | eMol4579587        | -7.7                     | -7.9         |
| 228 | eMol4397966        | -8.0                     | -8.1         | 281 | eMol46210804       | -7.6                     | -7.9         |
| 229 | eMol45622749       | -7.8                     | -8.1         | 282 | eMol25908513       | -7.9                     | -7.9         |
| 230 | eMol579718         | -8.0                     | -8.1         | 283 | eMol27202994       | -7.9                     | -7.9         |
| 231 | eMol179164947      | -7.8                     | -8.0         | 279 | eMol4116278        | -7.7                     | -7.9         |
| 232 | eMol27202242       | -8.0                     | -8.0         | 284 | eMol4552457        | -7.8                     | -7.9         |
| 233 | eMol27202948       | -7.4                     | -8.0         | 285 | eMol565168         | -8.6                     | -7.9         |
| 234 | eMol18551342       | -8.0                     | -8.0         | 286 | eMol1035565        | -7.9                     | -7.9         |
| 235 | eMol206992517      | -8.0                     | -8.0         | 287 | eMol26259383       | -7.3                     | -7.9         |
| 236 | eMol25966646       | -7.9                     | -8.0         | 288 | eMol679554         | -7.8                     | -7.9         |
| 237 | eMol4549830        | -7.3                     | -8.0         | 289 | eMol26315830       | -7.8                     | -7.9         |
| 238 | CHEMBL3805841      | -7.7                     | -8.0         | 290 | eMol46480212       | -7.8                     | -7.9         |
| 239 | eMol1035521        | -7.9                     | -8.0         | 291 | eMol4726858        | -7.6                     | -7.9         |
| 240 | CHEMBL1214934      | -7.0                     | -8.0         | 292 | eMol566288         | -7.8                     | -7.9         |
| 241 | eMol26262168       | -7.0                     | -8.0         | 293 | eMol587628         | -7.9                     | -7.9         |
| 242 | eMol28321864       | -8.0                     | -8.0         | 294 | CHEMBL3817906      | -7.7                     | -7.9         |
| 243 | eMol681814         | -7.9                     | -8.0         | 295 | CHEMBL3819338      | -7.6                     | -7.9         |
| 244 | CHEMBL1215082      | -7.4                     | -8.0         | 296 | eMol24313582       | -7.8                     | -7.9         |
| 245 | CHEMBL485839       | -8.0                     | -8.0         | 297 | eMol26242046       | -8.0                     | -7.9         |
| 246 | eMol43906047       | -7.9                     | -8.0         | 298 | eMol27202958       | -7.7                     | -7.9         |
| 247 | eMol43906057       | -7.4                     | -8.0         | 299 | eMol27202992       | -7.8                     | -7.9         |
| 248 | eMol46367311       | -7.8                     | -8.0         | 300 | eMol4555657        | -7.8                     | -7.9         |
| 249 | eMol581308         | -7.9                     | -8.0         | 301 | eMol4572924        | -7.8                     | -7.9         |
| 250 | CHEMBL2259943      | -7.9                     | -8.0         | 302 | eMol56752349       | -7.9                     | -7.9         |
| 251 | eMol4581322        | -8.0                     | -8.0         | 303 | eMol587646         | -7.5                     | -7.9         |
| 252 | CHEMBL2259944      | -8.0                     | -8.0         | 304 | eMol43745241       | -7.5                     | -7.9         |
| 253 | eMol20342220       | -7.8                     | -8.0         | 305 | eMol4389171        | -7.8                     | -7.9         |
| 254 | eMol20342278       | -7.9                     | -8.0         | 306 | eMol579044         | -7.4                     | -7.9         |
| 255 | eMol25810001       | -7.9                     | -8.0         | 307 | CHEMBL1528362      | -7.7                     | -7.9         |

Table S2. *Continued.*

| No. | Compound Name/Code | Docking score (kcal/mol) |              | No. | Compound Name/Code | Docking score (kcal/mol) |              |
|-----|--------------------|--------------------------|--------------|-----|--------------------|--------------------------|--------------|
|     |                    | Conventional             | Intermediate |     |                    | Conventional             | Intermediate |
| 308 | eMol179164959      | -7.9                     | -7.9         | 360 | eMol4740224        | -7.8                     | -7.8         |
| 309 | eMol19076348       | -7.7                     | -7.9         | 361 | eMol588388         | -7.6                     | -7.8         |
| 310 | CHEMBL3819186      | -7.8                     | -7.9         | 362 | eMol561887         | -7.8                     | -7.8         |
| 311 | eMol26251042       | -7.8                     | -7.9         | 363 | eMol23202652       | -7.8                     | -7.8         |
| 312 | CHEMBL3819597      | -7.8                     | -7.9         | 364 | CHEMBL3818582      | -7.1                     | -7.8         |
| 313 | eMol26311238       | -7.7                     | -7.9         | 365 | eMol1429356        | -7.3                     | -7.8         |
| 314 | eMol4555647        | -7.8                     | -7.9         | 366 | eMol17203477       | -7.5                     | -7.8         |
| 315 | CHEMBL1212961      | -7.8                     | -7.9         | 367 | eMol19076364       | -7.7                     | -7.8         |
| 316 | eMol18550688       | -7.8                     | -7.9         | 368 | eMol46365712       | -7.6                     | -7.8         |
| 317 | eMol19267414       | -7.8                     | -7.9         | 369 | eMol566118         | -7.5                     | -7.8         |
| 318 | eMol193447787      | -7.5                     | -7.9         | 370 | eMol679668         | -7.5                     | -7.8         |
| 319 | eMol24029848       | -7.5                     | -7.9         | 371 | eMol8267101        | -7.6                     | -7.8         |
| 320 | eMol26242054       | -7.4                     | -7.9         | 372 | eMol26312078       | -7.5                     | -7.8         |
| 321 | eMol300136046      | -7.8                     | -7.9         | 373 | eMol300445092      | -7.7                     | -7.8         |
| 322 | eMol681860         | -7.7                     | -7.9         | 374 | eMol30665797       | -7.7                     | -7.8         |
| 323 | CHEMBL1215006      | -7.3                     | -7.8         | 375 | eMol43744848       | -7.7                     | -7.8         |
| 324 | eMol20342268       | -7.7                     | -7.8         | 376 | CHEMBL3817850      | -7.7                     | -7.8         |
| 325 | eMol24520354       | -7.8                     | -7.8         | 377 | eMol20342205       | -7.7                     | -7.8         |
| 326 | eMol27202956       | -8.1                     | -7.8         | 378 | eMol27202264       | -7.7                     | -7.8         |
| 327 | eMol299966748      | -7.3                     | -7.8         | 379 | eMol206985996      | -7.7                     | -7.7         |
| 328 | eMol314064301      | -7.8                     | -7.8         | 380 | eMol25965034       | -7.7                     | -7.7         |
| 329 | eMol50301465       | -7.2                     | -7.8         | 381 | eMol26310961       | -7.7                     | -7.7         |
| 330 | CHEMBL1215081      | -7.9                     | -7.8         | 382 | eMol27202268       | -7.6                     | -7.7         |
| 331 | CHEMBL1215803      | -7.6                     | -7.8         | 383 | eMol43906067       | -7.5                     | -7.7         |
| 332 | CHEMBL3819140      | -7.6                     | -7.8         | 384 | eMol25810163       | -7.6                     | -7.7         |
| 333 | eMol206970196      | -7.8                     | -7.8         | 385 | eMol3103759        | -7.6                     | -7.7         |
| 334 | eMol24525196       | -7.7                     | -7.8         | 386 | eMol58034831       | -7.7                     | -7.7         |
| 335 | eMol26196328       | -7.9                     | -7.8         | 387 | eMol581076         | -7.4                     | -7.7         |
| 336 | eMol4090808        | -7.3                     | -7.8         | 388 | eMol179165002      | -7.7                     | -7.7         |
| 337 | eMol45585844       | -7.9                     | -7.8         | 389 | eMol179165014      | -7.7                     | -7.7         |
| 338 | eMol4579154        | -7.8                     | -7.8         | 390 | eMol20337448       | -7.2                     | -7.7         |
| 339 | eMol4580802        | -7.7                     | -7.8         | 391 | eMol23249723       | -7.7                     | -7.7         |
| 340 | eMol562493         | -7.7                     | -7.8         | 392 | eMol3318312        | -7.6                     | -7.7         |
| 341 | eMol679666         | -7.7                     | -7.8         | 393 | eMol588272         | -7.4                     | -7.7         |
| 342 | CHEMBL1214861      | -7.8                     | -7.8         | 394 | eMol26141700       | -7.7                     | -7.7         |
| 343 | CHEMBL1371074      | -7.7                     | -7.8         | 395 | eMol27202980       | -7.4                     | -7.7         |
| 344 | eMol23208796       | -7.2                     | -7.8         | 396 | CHEMBL1214645      | -7.3                     | -7.7         |
| 345 | eMol24511821       | -7.7                     | -7.8         | 397 | CHEMBL517897       | -7.7                     | -7.7         |
| 346 | eMol25813417       | -7.8                     | -7.8         | 398 | eMol25955419       | -7.7                     | -7.7         |
| 347 | eMol27202742       | -7.7                     | -7.8         | 399 | eMol27202996       | -7.3                     | -7.7         |
| 348 | eMol566380         | -7.9                     | -7.8         | 400 | eMol7667302        | -7.7                     | -7.7         |
| 349 | CHEMBL323866       | -7.6                     | -7.8         | 401 | eMol935898         | -7.2                     | -7.7         |
| 350 | eMol208103615      | -7.8                     | -7.8         | 402 | CHEMBL485838       | -7.6                     | -7.7         |
| 351 | eMol26242036       | -7.4                     | -7.8         | 403 | eMol26189153       | -7.4                     | -7.7         |
| 352 | eMol35699388       | -7.2                     | -7.8         | 404 | eMol26356948       | -7.4                     | -7.7         |
| 353 | eMol35717814       | -7.3                     | -7.8         | 405 | eMol588168         | -7.3                     | -7.7         |
| 354 | eMol4413761        | -7.7                     | -7.8         | 406 | eMol27203000       | -7.4                     | -7.7         |
| 355 | CHEMBL2403015      | -7.8                     | -7.8         | 407 | eMol43745056       | -7.3                     | -7.7         |
| 356 | CHEMBL3819445      | -8.1                     | -7.8         | 408 | eMol25810081       | -7.1                     | -7.7         |
| 357 | eMol16374637       | -7.5                     | -7.8         | 409 | eMol3060078        | -7.6                     | -7.7         |
| 358 | eMol1751766        | -7.5                     | -7.8         | 410 | eMol45701494       | -7.5                     | -7.7         |
| 359 | eMol3427847        | -7.5                     | -7.8         | 411 | eMol16683412       | -7.5                     | -7.7         |
| 329 | eMol50301465       | -7.2                     | -7.8         | 381 | eMol26310961       | -7.7                     | -7.7         |

Table S2. *Continued.*

| No. | Compound Name/Code | Docking score (kcal/mol) |              | No. | Compound Name/Code | Docking score (kcal/mol) |              |
|-----|--------------------|--------------------------|--------------|-----|--------------------|--------------------------|--------------|
|     |                    | Conventional             | Intermediate |     |                    | Conventional             | Intermediate |
| 412 | eMol26405201       | -7.5                     | -7.7         | 464 | eMol43730464       | -7.2                     | -7.6         |
| 413 | eMol27202262       | -7.6                     | -7.7         | 465 | eMol4551561        | -7.5                     | -7.6         |
| 414 | eMol43731776       | -7.1                     | -7.7         | 466 | eMol4577787        | -7.6                     | -7.6         |
| 415 | eMol565754         | -7.5                     | -7.7         | 467 | eMol588256         | -7.5                     | -7.6         |
| 416 | eMol233088901      | -7.5                     | -7.6         | 468 | eMol9919488        | -7.4                     | -7.6         |
| 417 | eMol4574833        | -7.6                     | -7.6         | 469 | CHEMBL117642       | -7.4                     | -7.6         |
| 418 | eMol1675430        | -7.6                     | -7.6         | 470 | CHEMBL511010       | -7.4                     | -7.6         |
| 419 | eMol1764190        | -7.3                     | -7.6         | 471 | eMol25896479       | -7.5                     | -7.6         |
| 420 | eMol25784115       | -7.6                     | -7.6         | 472 | eMol43906063       | -7.9                     | -7.6         |
| 421 | eMol32369766       | -7.6                     | -7.6         | 473 | eMol46400681       | -7.5                     | -7.6         |
| 422 | CHEMBL3818012      | -7.5                     | -7.6         | 474 | eMol8238281        | -7.3                     | -7.6         |
| 423 | CHEMBL520033       | -7.5                     | -7.6         | 475 | CHEMBL1994876      | -7.4                     | -7.5         |
| 424 | eMol27202960       | -7.5                     | -7.6         | 476 | CHEMBL250917       | -7.5                     | -7.5         |
| 425 | eMol4075283        | -7.3                     | -7.6         | 477 | CHEMBL3817957      | -7.5                     | -7.5         |
| 426 | eMol4587779        | -7.5                     | -7.6         | 478 | eMol1679768        | -7.5                     | -7.5         |
| 427 | eMol956409         | -7.6                     | -7.6         | 479 | eMol27202984       | -7.3                     | -7.5         |
| 428 | eMol24116475       | -7.5                     | -7.6         | 480 | eMol4480890        | -7.5                     | -7.5         |
| 429 | eMol26327269       | -7.6                     | -7.6         | 481 | eMol45708568       | -7.2                     | -7.5         |
| 430 | eMol32812942       | -7.4                     | -7.6         | 482 | eMol1025907        | -7.4                     | -7.5         |
| 431 | eMol6753441        | -7.5                     | -7.6         | 483 | eMol18940061       | -7.5                     | -7.5         |
| 432 | eMol944638         | -7.6                     | -7.6         | 484 | eMol206875270      | -7.4                     | -7.5         |
| 433 | eMol1429358        | -7.5                     | -7.6         | 485 | eMol299962831      | -7.4                     | -7.5         |
| 434 | eMol179177638      | -7.4                     | -7.6         | 486 | CHEMBL1584455      | -7.5                     | -7.5         |
| 435 | eMol25909178       | -7.7                     | -7.6         | 487 | CHEMBL3819326      | -7.5                     | -7.5         |
| 436 | eMol46480052       | -7.6                     | -7.6         | 488 | eMol23250559       | -7.5                     | -7.5         |
| 437 | CHEMBL3818704      | -7.4                     | -7.6         | 489 | eMol25810127       | -7.5                     | -7.5         |
| 438 | CHEMBL397391       | -7.3                     | -7.6         | 490 | eMol4386746        | -7.5                     | -7.5         |
| 439 | eMol32246523       | -7.2                     | -7.6         | 491 | eMol45944068       | -7.5                     | -7.5         |
| 440 | eMol561655         | -7.3                     | -7.6         | 492 | CHEMBL1499977      | -7.4                     | -7.5         |
| 441 | eMol588102         | -7.6                     | -7.6         | 493 | CHEMBL3805023      | -7.4                     | -7.5         |
| 442 | eMol7635480        | -7.6                     | -7.6         | 494 | CHEMBL462179       | -7.9                     | -7.5         |
| 443 | CHEMBL114364       | -7.5                     | -7.6         | 495 | eMol1040103        | -7.5                     | -7.5         |
| 444 | eMol18958642       | -7.6                     | -7.6         | 496 | eMol181128729      | -7.4                     | -7.5         |
| 445 | eMol24058094       | -7.4                     | -7.6         | 497 | eMol19266607       | -7.5                     | -7.5         |
| 446 | eMol46509913       | -7.1                     | -7.6         | 498 | eMol25937897       | -7.4                     | -7.5         |
| 447 | eMol46509917       | -7.6                     | -7.6         | 499 | eMol26255667       | -7.5                     | -7.5         |
| 448 | eMol5779489        | -7.6                     | -7.6         | 500 | eMol27202250       | -7.4                     | -7.5         |
| 449 | eMol587808         | -7.4                     | -7.6         | 501 | eMol27202902       | -7.4                     | -7.5         |
| 450 | eMol588228         | -7.2                     | -7.6         | 502 | eMol2993022        | -7.4                     | -7.5         |
| 451 | CHEMBL117438       | -7.2                     | -7.6         | 503 | eMol300014864      | -7.5                     | -7.5         |
| 452 | CHEMBL1423402      | -7.1                     | -7.6         | 504 | eMol46479990       | -7.5                     | -7.5         |
| 453 | eMol206987969      | -7.5                     | -7.6         | 505 | eMol565838         | -7.3                     | -7.5         |
| 454 | eMol2130046        | -7.2                     | -7.6         | 506 | CHEMBL116817       | -7.2                     | -7.5         |
| 455 | eMol36904288       | -7.1                     | -7.6         | 507 | eMol206908008      | -7.5                     | -7.5         |
| 456 | eMol4448933        | -7.5                     | -7.6         | 508 | eMol206985560      | -7.5                     | -7.5         |
| 457 | eMol5444969        | -7.2                     | -7.6         | 509 | eMol24520756       | -7.4                     | -7.5         |
| 458 | eMol935130         | -7.5                     | -7.6         | 510 | eMol25902291       | -7.2                     | -7.5         |
| 459 | CHEMBL1214868      | -7.6                     | -7.6         | 511 | eMol276247970      | -7.3                     | -7.5         |
| 460 | CHEMBL3818515      | -7.5                     | -7.6         | 512 | eMol300990951      | -7.3                     | -7.5         |
| 461 | eMol20377433       | -7.6                     | -7.6         | 513 | eMol3317346        | -7.2                     | -7.5         |
| 462 | eMol26683947       | -7.6                     | -7.6         | 514 | eMol4485131        | -7.3                     | -7.5         |
| 463 | eMol28321866       | -7.5                     | -7.6         | 515 | eMol4725672        | -7.4                     | -7.5         |



Table S2. *Continued.*

| No.  | Compound Name/Code | Docking score (kcal/mol) |              | No.  | Compound Name/Code | Docking score (kcal/mol) |              |
|------|--------------------|--------------------------|--------------|------|--------------------|--------------------------|--------------|
|      |                    | Conventional             | Intermediate |      |                    | Conventional             | Intermediate |
| 516: | CHEMBL1360793      | -7.4                     | -7.5         | 568  | eMol4706083        | -7.2                     | -7.4         |
| 517: | CHEMBL602627       | -7.5                     | -7.5         | 569  | eMol16352353       | -7.4                     | -7.4         |
| 518: | eMol20356176       | -7.4                     | -7.5         | 570  | eMol24519100       | -7.0                     | -7.4         |
| 519: | eMol25816251       | -7.5                     | -7.5         | 571  | eMol26327656       | -7.4                     | -7.4         |
| 520: | eMol27091590       | -7.3                     | -7.5         | 572  | eMol27338418       | -7.4                     | -7.4         |
| 521: | eMol4521223        | -7.4                     | -7.5         | 573  | eMol46210806       | -7.4                     | -7.4         |
| 522: | eMol4567258        | -7.5                     | -7.5         | 574  | eMol48597407       | -7.1                     | -7.4         |
| 523: | eMol45935466       | -7.5                     | -7.5         | 575: | CHEMBL3818933      | -7.3                     | -7.4         |
| 524: | eMol684240         | -7.3                     | -7.5         | 576  | eMol1324430        | -7.3                     | -7.4         |
| 525: | CHEMBL1988177      | -7.4                     | -7.5         | 577  | eMol18551352       | -7.2                     | -7.4         |
| 526: | eMol25903079       | -7.4                     | -7.5         | 578  | eMol2166708        | -7.1                     | -7.4         |
| 527: | eMol25965334       | -7.4                     | -7.5         | 579  | eMol23246986       | -7.2                     | -7.4         |
| 528: | eMol26250892       | -7.3                     | -7.5         | 580  | eMol2385157        | -7.3                     | -7.4         |
| 529: | eMol45928112       | -7.4                     | -7.5         | 581  | eMol25902329       | -7.4                     | -7.4         |
| 530: | eMol46528447       | -7.5                     | -7.5         | 582  | eMol26219237       | -7.2                     | -7.4         |
| 531: | CHEMBL116408       | -7.3                     | -7.5         | 583  | eMol26246365       | -7.4                     | -7.4         |
| 532: | eMol20354197       | -7.4                     | -7.5         | 584  | eMol4572232        | -7.1                     | -7.4         |
| 533: | eMol2880336        | -7.3                     | -7.5         | 585  | eMol935636         | -7.2                     | -7.4         |
| 534: | eMol49384601       | -7.5                     | -7.5         | 586: | CHEMBL3805378      | -7.4                     | -7.4         |
| 535: | eMol75932399       | -7.4                     | -7.5         | 587: | CHEMBL3819459      | -7.0                     | -7.4         |
| 536: | eMol20337444       | -7.5                     | -7.5         | 588: | CHEMBL3819532      | -7.4                     | -7.4         |
| 537: | eMol24419686       | -7.2                     | -7.5         | 589  | eMol25903125       | -7.4                     | -7.4         |
| 538: | eMol27202290       | -7.5                     | -7.5         | 590  | eMol32812998       | -7.1                     | -7.4         |
| 539: | eMol3535618        | -7.5                     | -7.5         | 591  | eMol32813226       | -7.2                     | -7.4         |
| 540: | eMol579714         | -7.3                     | -7.5         | 592  | eMol32813234       | -7.2                     | -7.4         |
| 541: | eMol24526444       | -7.3                     | -7.5         | 593  | eMol46479912       | -7.4                     | -7.4         |
| 542: | eMol27187406       | -7.5                     | -7.5         | 594  | eMol4934666        | -7.4                     | -7.4         |
| 543: | eMol27202402       | -7.4                     | -7.5         | 595  | eMol936420         | -7.1                     | -7.4         |
| 544: | eMol31760166       | -7.2                     | -7.5         | 596: | CHEMBL1402619      | -7.4                     | -7.4         |
| 545: | eMol46480026       | -7.4                     | -7.5         | 597: | CHEMBL3818910      | -7.3                     | -7.4         |
| 546: | eMol46480194       | -7.7                     | -7.5         | 598  | eMol1040791        | -7.3                     | -7.4         |
| 547: | eMol2408165        | -7.1                     | -7.4         | 599  | eMol16351683       | -7.4                     | -7.4         |
| 548: | eMol33346433       | -7.1                     | -7.4         | 600  | eMol206921779      | -7.2                     | -7.4         |
| 549: | eMol565478         | -7.4                     | -7.4         | 601  | eMol25810171       | -7.4                     | -7.4         |
| 550: | CHEMBL455639       | -7.3                     | -7.4         | 602  | eMol26324339       | -7.3                     | -7.4         |
| 551: | eMol1149869        | -7.0                     | -7.4         | 603  | eMol27202936       | -7.4                     | -7.4         |
| 552: | eMol18550714       | -7.2                     | -7.4         | 604  | eMol4739467        | -7.4                     | -7.4         |
| 553: | eMol23247039       | -7.4                     | -7.4         | 605  | eMol72578631       | -7.0                     | -7.4         |
| 554: | eMol24524408       | -7.4                     | -7.4         | 606  | eMol1678605        | -7.3                     | -7.4         |
| 555: | eMol4708971        | -7.3                     | -7.4         | 607  | eMol19076750       | -7.3                     | -7.4         |
| 556: | eMol588158         | -7.3                     | -7.4         | 608  | eMol24520553       | -7.1                     | -7.4         |
| 557: | eMol936632         | -7.2                     | -7.4         | 609  | eMol24538139       | -7.3                     | -7.4         |
| 558: | eMol956403         | -7.4                     | -7.4         | 610  | eMol25829045       | -7.2                     | -7.4         |
| 559: | CHEMBL3818229      | -7.2                     | -7.4         | 611  | eMol26936203       | -7.4                     | -7.4         |
| 560: | eMol16056893       | -7.2                     | -7.4         | 612  | eMol27202398       | -7.2                     | -7.4         |
| 561: | eMol20378545       | -7.4                     | -7.4         | 613  | eMol276247952      | -7.3                     | -7.4         |
| 562: | eMol24427986       | -7.0                     | -7.4         | 614  | eMol300978663      | -7.3                     | -7.4         |
| 563: | eMol25918241       | -7.3                     | -7.4         | 615  | eMol4490859        | -7.2                     | -7.4         |
| 564: | eMol26316348       | -7.4                     | -7.4         | 616  | eMol46445765       | -7.2                     | -7.4         |
| 565: | eMol4565043        | -7.0                     | -7.4         | 617  | eMol206850549      | -7.3                     | -7.4         |
| 566: | eMol46479157       | -7.4                     | -7.4         | 618  | eMol207259512      | -7.3                     | -7.4         |
| 567: | eMol46479980       | -7.4                     | -7.4         | 619  | eMol299991997      | -7.3                     | -7.4         |
| 537: | eMol24419686       | -7.2                     | -7.5         | 589  | eMol25903125       | -7.4                     | -7.4         |

Table S2. *Continued.*

| No.  | Compound Name/Code | Docking score (kcal/mol) |              | No. | Compound Name/Code | Docking score (kcal/mol) |              |
|------|--------------------|--------------------------|--------------|-----|--------------------|--------------------------|--------------|
|      |                    | Conventional             | Intermediate |     |                    | Conventional             | Intermediate |
| 620: | eMol4732807        | -7.3                     | -7.4         | 672 | eMol43731198       | -7.1                     | -7.3         |
| 621: | eMol956477         | -7.3                     | -7.4         | 673 | eMol566406         | -7.2                     | -7.3         |
| 622: | CHEMBL3818171      | -7.1                     | -7.4         | 674 | eMol588242         | -7.7                     | -7.3         |
| 623: | CHEMBL579620       | -7.2                     | -7.4         | 675 | CHEMBL3805665      | -7.1                     | -7.3         |
| 624: | eMol1683032        | -7.3                     | -7.4         | 676 | CHEMBL3819311      | -7.2                     | -7.3         |
| 625: | eMol20337442       | -7.1                     | -7.4         | 677 | CHEMBL38330        | -7.1                     | -7.3         |
| 626: | eMol2141753        | -7.2                     | -7.4         | 678 | eMol11071566       | -7.3                     | -7.3         |
| 627: | eMol25968613       | -7.2                     | -7.4         | 679 | eMol206964256      | -7.3                     | -7.3         |
| 628: | eMol26245604       | -7.3                     | -7.4         | 680 | eMol23206884       | -7.3                     | -7.3         |
| 629: | eMol27202970       | -7.3                     | -7.4         | 681 | eMol24520802       | -7.3                     | -7.3         |
| 630: | eMol4606566        | -7.2                     | -7.4         | 682 | eMol25771182       | -7.3                     | -7.3         |
| 631: | eMol4715267        | -7.3                     | -7.4         | 683 | eMol25907499       | -7.3                     | -7.3         |
| 632: | eMol4728946        | -7.3                     | -7.4         | 684 | eMol25913211       | -7.3                     | -7.3         |
| 633: | CHEMBL114005       | -7.1                     | -7.3         | 685 | eMol26262902       | -7.3                     | -7.3         |
| 634: | eMol18961180       | -7.2                     | -7.3         | 686 | eMol316831112      | -7.2                     | -7.3         |
| 635: | eMol19076404       | -7.4                     | -7.3         | 687 | eMol4433627        | -7.2                     | -7.3         |
| 636: | eMol206907968      | -7.3                     | -7.3         | 688 | eMol4580053        | -7.5                     | -7.3         |
| 637: | eMol24520050       | -7.3                     | -7.3         | 689 | eMol24532024       | -7.3                     | -7.3         |
| 638: | eMol316344188      | -7.3                     | -7.3         | 690 | eMol25958221       | -7.2                     | -7.3         |
| 639: | eMol44673597       | -7.3                     | -7.3         | 691 | eMol26264151       | -7.1                     | -7.3         |
| 640: | eMol4698359        | -7.4                     | -7.3         | 692 | eMol26300005       | -7.2                     | -7.3         |
| 641: | eMol4718679        | -7.2                     | -7.3         | 693 | eMol26326968       | -7.3                     | -7.3         |
| 642: | eMol17203597       | -7.0                     | -7.3         | 694 | eMol26936207       | -7.2                     | -7.3         |
| 643: | eMol180102976      | -7.3                     | -7.3         | 695 | eMol27187414       | -7.1                     | -7.3         |
| 644: | eMol25797977       | -7.3                     | -7.3         | 696 | eMol27202912       | -7.3                     | -7.3         |
| 645: | eMol29649914       | -7.3                     | -7.3         | 697 | eMol579510         | -7.1                     | -7.3         |
| 646: | eMol4477952        | -7.3                     | -7.3         | 698 | eMol935864         | -7.6                     | -7.3         |
| 647: | eMol45622753       | -7.3                     | -7.3         | 699 | CHEMBL113923       | -7.1                     | -7.3         |
| 648: | CHEMBL115809       | -7.3                     | -7.3         | 700 | CHEMBL47157        | -7.2                     | -7.3         |
| 649: | CHEMBL116634       | -7.3                     | -7.3         | 701 | eMol179164953      | -7.2                     | -7.3         |
| 650: | eMol17192354       | -7.2                     | -7.3         | 702 | eMol20380394       | -7.1                     | -7.3         |
| 651: | eMol179164956      | -7.2                     | -7.3         | 703 | eMol2330950        | -7.3                     | -7.3         |
| 652: | eMol23242679       | -7.3                     | -7.3         | 704 | eMol25902283       | -7.3                     | -7.3         |
| 653: | eMol25901925       | -7.3                     | -7.3         | 705 | eMol26285150       | -7.3                     | -7.3         |
| 654: | eMol25936279       | -7.3                     | -7.3         | 706 | eMol27187400       | -7.1                     | -7.3         |
| 655: | eMol26230266       | -7.3                     | -7.3         | 707 | eMol46400679       | -7.3                     | -7.3         |
| 656: | eMol26315986       | -7.3                     | -7.3         | 708 | eMol4713307        | -7.2                     | -7.3         |
| 657: | eMol27252901       | -7.3                     | -7.3         | 709 | CHEMBL4099863      | -7.2                     | -7.3         |
| 658: | eMol4713633        | -7.3                     | -7.3         | 710 | eMol24521048       | -7.3                     | -7.3         |
| 659: | CHEMBL3819196      | -7.1                     | -7.3         | 711 | eMol25966304       | -7.3                     | -7.3         |
| 660: | eMol16797514       | -8.1                     | -7.3         | 712 | eMol27202388       | -7.3                     | -7.3         |
| 661: | eMol19076688       | -7.3                     | -7.3         | 713 | eMol27202918       | -7.2                     | -7.3         |
| 662: | eMol20375154       | -7.3                     | -7.3         | 714 | eMol46400677       | -7.2                     | -7.3         |
| 663: | eMol26300049       | -7.3                     | -7.3         | 715 | eMol4709495        | -7.2                     | -7.3         |
| 664: | eMol46370139       | -7.3                     | -7.3         | 716 | CHEMBL1302012      | -7.1                     | -7.3         |
| 665: | eMol51435800       | -7.5                     | -7.3         | 717 | CHEMBL2297150      | -7.0                     | -7.3         |
| 666: | CHEMBL1383006      | -7.1                     | -7.3         | 718 | CHEMBL326628       | -7.2                     | -7.3         |
| 667: | eMol17202599       | -7.1                     | -7.3         | 719 | CHEMBL3817866      | -7.2                     | -7.3         |
| 668: | eMol180102764      | -7.2                     | -7.3         | 720 | CHEMBL3818856      | -7.1                     | -7.3         |
| 669: | eMol23191317       | -7.3                     | -7.3         | 721 | CHEMBL577676       | -7.2                     | -7.3         |
| 670: | eMol2409922        | -7.2                     | -7.3         | 722 | CHEMBL585981       | -7.2                     | -7.3         |
| 671: | eMol26251302       | -7.1                     | -7.3         | 723 | eMol1120546        | -7.2                     | -7.3         |
| 641: | eMol4718679        | -7.2                     | -7.3         | 693 | eMol26326968       | -7.3                     | -7.3         |

Table S2. *Continued.*

| No.  | Compound Name/Code | Docking score (kcal/mol) |              | No. | Compound Name/Code | Docking score (kcal/mol) |              |
|------|--------------------|--------------------------|--------------|-----|--------------------|--------------------------|--------------|
|      |                    | Conventional             | Intermediate |     |                    | Conventional             | Intermediate |
| 724: | eMol18866942       | -7.1                     | -7.3         | 776 | eMol45133343       | -7.2                     | -7.2         |
| 725: | eMol24113359       | -7.2                     | -7.3         | 777 | eMol46491554       | -7.2                     | -7.2         |
| 726: | eMol25825125       | -7.2                     | -7.3         | 778 | eMol588078         | -7.1                     | -7.2         |
| 727: | eMol26250339       | -7.1                     | -7.3         | 779 | eMol7265152        | -7.6                     | -7.2         |
| 728: | eMol26285928       | -7.2                     | -7.3         | 780 | eMol22370884       | -7.2                     | -7.2         |
| 729: | eMol26314361       | -7.2                     | -7.3         | 781 | eMol24521662       | -7.2                     | -7.2         |
| 730: | eMol26569999       | -7.2                     | -7.3         | 782 | eMol24526765       | -7.1                     | -7.2         |
| 731: | eMol29987858       | -7.0                     | -7.3         | 783 | eMol2517109        | -7.1                     | -7.2         |
| 732: | eMol4408548        | -7.2                     | -7.3         | 784 | eMol25963663       | -7.2                     | -7.2         |
| 733: | eMol44127206       | -7.4                     | -7.3         | 785 | eMol26328784       | -7.2                     | -7.2         |
| 734: | eMol46479958       | -7.2                     | -7.3         | 786 | eMol27202280       | -7.1                     | -7.2         |
| 735: | eMol4726520        | -7.2                     | -7.3         | 787 | eMol27202496       | -7.1                     | -7.2         |
| 736: | CHEMBL296691       | -7.2                     | -7.2         | 788 | eMol27202506       | -7.2                     | -7.2         |
| 737: | eMol19076602       | -7.2                     | -7.2         | 789 | eMol27202540       | -7.2                     | -7.2         |
| 738: | eMol24520240       | -7.2                     | -7.2         | 790 | eMol30744925       | -7.3                     | -7.2         |
| 739: | eMol24521330       | -7.2                     | -7.2         | 791 | eMol4146706        | -7.1                     | -7.2         |
| 740: | eMol25902049       | -7.1                     | -7.2         | 792 | eMol43744846       | -7.1                     | -7.2         |
| 741: | eMol26285666       | -7.2                     | -7.2         | 793 | eMol46400687       | -7.2                     | -7.2         |
| 742: | eMol26314117       | -7.1                     | -7.2         | 794 | eMol46479996       | -7.2                     | -7.2         |
| 743: | eMol27202754       | -7.2                     | -7.2         | 795 | eMol5672543        | -7.1                     | -7.2         |
| 744: | eMol2768990        | -7.2                     | -7.2         | 796 | CHEMBL3805042      | -7.2                     | -7.2         |
| 745: | eMol29665906       | -7.1                     | -7.2         | 797 | CHEMBL3806178      | -7.2                     | -7.2         |
| 746: | eMol43731202       | -7.7                     | -7.2         | 798 | CHEMBL3818209      | -7.1                     | -7.2         |
| 747: | eMol46370137       | -7.2                     | -7.2         | 799 | eMol18550720       | -7.2                     | -7.2         |
| 748: | eMol566256         | -7.5                     | -7.2         | 800 | eMol206987841      | -7.0                     | -7.2         |
| 749: | eMol956435         | -7.3                     | -7.2         | 801 | eMol23201309       | -7.2                     | -7.2         |
| 750: | CHEMBL1559857      | -7.1                     | -7.2         | 802 | eMol25819233       | -7.1                     | -7.2         |
| 751: | CHEMBL3806097      | -7.2                     | -7.2         | 803 | eMol26314895       | -7.1                     | -7.2         |
| 752: | CHEMBL3806218      | -7.1                     | -7.2         | 804 | eMol26315041       | -7.0                     | -7.2         |
| 753: | eMol16351673       | -7.1                     | -7.2         | 805 | eMol27202282       | -7.1                     | -7.2         |
| 754: | eMol18516265       | -7.2                     | -7.2         | 806 | eMol27202756       | -7.2                     | -7.2         |
| 755: | eMol18550716       | -7.1                     | -7.2         | 807 | CHEMBL1562035      | -7.1                     | -7.2         |
| 756: | eMol23241510       | -7.2                     | -7.2         | 808 | eMol25912447       | -7.1                     | -7.2         |
| 757: | eMol25770408       | -7.2                     | -7.2         | 809 | eMol26277244       | -7.2                     | -7.2         |
| 758: | eMol26289047       | -7.2                     | -7.2         | 810 | eMol26292416       | -7.2                     | -7.2         |
| 759: | eMol27045407       | -7.2                     | -7.2         | 811 | eMol26316052       | -7.2                     | -7.2         |
| 760: | eMol27202350       | -7.2                     | -7.2         | 812 | eMol27202358       | -7.2                     | -7.2         |
| 761: | eMol27202914       | -7.2                     | -7.2         | 813 | CHEMBL34185        | -7.1                     | -7.2         |
| 762: | eMol43746869       | -7.2                     | -7.2         | 814 | CHEMBL3818747      | -7.1                     | -7.2         |
| 763: | eMol5444645        | -7.1                     | -7.2         | 815 | eMol2208925        | -7.5                     | -7.2         |
| 764: | eMol5847921        | -7.2                     | -7.2         | 816 | eMol2308510        | -7.0                     | -7.2         |
| 765: | CHEMBL1552848      | -7.1                     | -7.2         | 817 | eMol23152351       | -7.0                     | -7.2         |
| 766: | CHEMBL247353       | -7.1                     | -7.2         | 818 | eMol23170772       | -7.2                     | -7.2         |
| 767: | CHEMBL4079984      | -7.2                     | -7.2         | 819 | eMol25810099       | -7.2                     | -7.2         |
| 768: | eMol18860491       | -7.5                     | -7.2         | 820 | eMol26289870       | -7.2                     | -7.2         |
| 769: | eMol19076828       | -7.0                     | -7.2         | 821 | eMol26310907       | -7.2                     | -7.2         |
| 770: | eMol2115166        | -7.1                     | -7.2         | 822 | eMol27202410       | -7.2                     | -7.2         |
| 771: | eMol26293580       | -7.1                     | -7.2         | 823 | eMol27202762       | -7.2                     | -7.2         |
| 772: | eMol27045405       | -7.2                     | -7.2         | 824 | eMol206964558      | -7.1                     | -7.2         |
| 773: | eMol27202232       | -7.1                     | -7.2         | 825 | eMol23185851       | -7.1                     | -7.2         |
| 774: | eMol27202920       | -7.2                     | -7.2         | 826 | eMol23241342       | -7.2                     | -7.2         |
| 775: | eMol30322739       | -7.2                     | -7.2         | 827 | eMol24518463       | -7.2                     | -7.2         |

Table S2. *Continued.*

| No.  | Compound Name/Code | Docking score (kcal/mol) |              | No.  | Compound Name/Code | Docking score (kcal/mol) |              |
|------|--------------------|--------------------------|--------------|------|--------------------|--------------------------|--------------|
|      |                    | Conventional             | Intermediate |      |                    | Conventional             | Intermediate |
| 828: | eMol26330383       | -7.2                     | -7.2         | 880: | eMol25816255       | -7.0                     | -7.1         |
| 829: | eMol26936201       | -7.1                     | -7.2         | 881: | eMol26276632       | -7.1                     | -7.1         |
| 830: | eMol27045521       | -7.2                     | -7.2         | 882: | CHEMBL1551922      | -7.1                     | -7.1         |
| 831: | eMol36016142       | -7.1                     | -7.2         | 883: | CHEMBL3818499      | -7.1                     | -7.1         |
| 832: | eMol46545587       | -7.1                     | -7.2         | 884: | CHEMBL3818977      | -7.1                     | -7.1         |
| 833: | eMol24428006       | -7.1                     | -7.2         | 885: | eMol206990555      | -7.1                     | -7.1         |
| 834: | eMol25770418       | -7.1                     | -7.2         | 886: | eMol24524699       | -7.1                     | -7.1         |
| 835: | eMol26310653       | -7.0                     | -7.2         | 887: | eMol25771206       | -7.1                     | -7.1         |
| 836: | eMol26315688       | -7.1                     | -7.2         | 888: | eMol26286396       | -7.1                     | -7.1         |
| 837: | eMol560303         | -7.1                     | -7.2         | 889: | eMol26311934       | -7.4                     | -7.1         |
| 838: | CHEMBL3805407      | -7.1                     | -7.2         | 890: | eMol26312838       | -7.1                     | -7.1         |
| 839: | eMol24519079       | -7.2                     | -7.2         | 891: | eMol26314721       | -7.3                     | -7.1         |
| 840: | eMol24521248       | -7.1                     | -7.2         | 892: | eMol27202336       | -7.1                     | -7.1         |
| 841: | eMol26189151       | -7.1                     | -7.2         | 893: | eMol27202362       | -7.1                     | -7.1         |
| 842: | eMol26292060       | -7.1                     | -7.2         | 894: | eMol30104228       | -7.1                     | -7.1         |
| 843: | eMol26310839       | -7.1                     | -7.2         | 895: | eMol43731200       | -8.0                     | -7.1         |
| 844: | eMol26314359       | -7.1                     | -7.2         | 896: | CHEMBL3804857      | -7.1                     | -7.1         |
| 845: | eMol26936209       | -7.1                     | -7.2         | 897: | eMol1165997        | -7.1                     | -7.1         |
| 846: | eMol45932769       | -7.1                     | -7.2         | 898: | eMol16352193       | -7.0                     | -7.1         |
| 847: | eMol46534208       | -7.1                     | -7.2         | 899: | eMol19076826       | -7.1                     | -7.1         |
| 848: | eMol6263477        | -7.1                     | -7.2         | 900: | eMol206920578      | -7.1                     | -7.1         |
| 849: | eMol106491702      | -7.1                     | -7.1         | 901: | eMol2231344        | -7.2                     | -7.1         |
| 850: | eMol16351675       | -7.1                     | -7.1         | 902: | eMol25924517       | -7.1                     | -7.1         |
| 851: | eMol19076732       | -7.0                     | -7.1         | 903: | eMol25966294       | -7.1                     | -7.1         |
| 852: | eMol206980481      | -7.1                     | -7.1         | 904: | eMol316862506      | -7.1                     | -7.1         |
| 853: | eMol23242609       | -7.1                     | -7.1         | 905: | CHEMBL299107       | -7.1                     | -7.1         |
| 854: | eMol26313449       | -7.1                     | -7.1         | 906: | CHEMBL3804866      | -7.1                     | -7.1         |
| 855: | eMol26319543       | -7.1                     | -7.1         | 907: | CHEMBL3818626      | -7.0                     | -7.1         |
| 856: | CHEMBL1414265      | -7.1                     | -7.1         | 908: | eMol15983174       | -7.0                     | -7.1         |
| 857: | eMol1156520        | -7.2                     | -7.1         | 909: | eMol1748795        | -7.7                     | -7.1         |
| 858: | eMol20344945       | -7.1                     | -7.1         | 910: | eMol24520023       | -7.1                     | -7.1         |
| 859: | eMol206965980      | -7.1                     | -7.1         | 911: | eMol24531798       | -7.1                     | -7.1         |
| 860: | eMol26270766       | -7.1                     | -7.1         | 912: | eMol25913057       | -7.1                     | -7.1         |
| 861: | eMol26276502       | -7.1                     | -7.1         | 913: | eMol26288955       | -7.1                     | -7.1         |
| 862: | eMol4491662        | -7.1                     | -7.1         | 914: | eMol26326313       | -7.1                     | -7.1         |
| 863: | CHEMBL1394809      | -7.0                     | -7.1         | 915: | eMol31278496       | -7.1                     | -7.1         |
| 864: | eMol16351677       | -7.1                     | -7.1         | 916: | eMol46400683       | -7.0                     | -7.1         |
| 865: | eMol18542840       | -7.1                     | -7.1         | 917: | eMol566142         | -7.4                     | -7.1         |
| 866: | eMol20380392       | -7.1                     | -7.1         | 918: | eMol579926         | -7.1                     | -7.1         |
| 867: | eMol206843436      | -7.0                     | -7.1         | 919: | CHEMBL1439596      | -7.1                     | -7.1         |
| 868: | eMol24428326       | -7.4                     | -7.1         | 920: | CHEMBL550397       | -7.1                     | -7.1         |
| 869: | eMol25790309       | -7.1                     | -7.1         | 921: | eMol20378615       | -7.1                     | -7.1         |
| 870: | eMol26331720       | -7.1                     | -7.1         | 922: | eMol24430231       | -7.1                     | -7.1         |
| 871: | eMol26350850       | -7.1                     | -7.1         | 923: | eMol24531722       | -7.1                     | -7.1         |
| 872: | eMol26570001       | -7.1                     | -7.1         | 924: | eMol26314551       | -7.0                     | -7.1         |
| 873: | eMol27187440       | -7.1                     | -7.1         | 925: | eMol4709315        | -7.0                     | -7.1         |
| 874: | eMol45935468       | -7.1                     | -7.1         | 926: | eMol6157528        | -7.0                     | -7.1         |
| 875: | eMol588368         | -7.1                     | -7.1         | 927: | CHEMBL1215796      | -7.1                     | -7.1         |
| 876: | CHEMBL3818347      | -7.0                     | -7.1         | 928: | eMol19076734       | -7.0                     | -7.1         |
| 877: | eMol1035551        | -7.1                     | -7.1         | 929: | eMol20310561       | -7.1                     | -7.1         |
| 878: | eMol18550722       | -7.1                     | -7.1         | 930: | eMol206849669      | -7.1                     | -7.1         |
| 879: | eMol19076370       | -7.0                     | -7.1         | 931: | eMol25945602       | -7.1                     | -7.1         |
| 849: | eMol106491702      | -7.1                     | -7.1         | 901: | eMol2231344        | -7.2                     | -7.1         |

Table S2. *Continued.*

| No.  | Compound Name/Code | Docking score (kcal/mol) |              | No.  | Compound Name/Code | Docking score (kcal/mol) |              |
|------|--------------------|--------------------------|--------------|------|--------------------|--------------------------|--------------|
|      |                    | Conventional             | Intermediate |      |                    | Conventional             | Intermediate |
| 932: | eMol299994300      | -7.1                     | -7.1         | 967  | eMol43731774       | -7.2                     | -6.9         |
| 933: | eMol300089978      | -7.1                     | -7.1         | 968  | eMol3018072        | -7.4                     | -6.9         |
| 934: | eMol956263         | -7.1                     | -7.1         | 969  | eMol316351191      | -7.5                     | -6.9         |
| 935: | CHEMBL1373990      | -7.0                     | -7.1         | 970  | eMol206964210      | -7.0                     | -6.8         |
| 936: | eMol16379841       | -7.0                     | -7.1         | 971  | eMol27115486       | -7.3                     | -6.8         |
| 937: | eMol1752196        | -7.0                     | -7.1         | 972  | eMol23244410       | -7.1                     | -6.8         |
| 938: | eMol25895011       | -7.0                     | -7.1         | 973  | eMol33339294       | -7.1                     | -6.7         |
| 939: | eMol25913175       | -7.1                     | -7.1         | 974  | eMol2992508        | -7.6                     | -6.7         |
| 940: | eMol26524217       | -7.0                     | -7.1         | 975  | eMol4732869        | -7.1                     | -6.7         |
| 941: | eMol3033983        | -7.1                     | -7.1         | 976  | CHEMBL395117       | -7.1                     | -6.6         |
| 942: | eMol207355370      | -7.3                     | -7.0         | 977  | eMol4738130        | -7.2                     | -6.6         |
| 943: | eMol25895009       | -7.0                     | -7.0         | 978  | eMol25895023       | -7.3                     | -6.5         |
| 944: | eMol679754         | -7.1                     | -7.0         | 979  | eMol27380659       | -7.8                     | -6.5         |
| 945: | CHEMBL3818366      | -7.0                     | -7.0         | 980  | eMol1149947        | -7.3                     | -6.5         |
| 946: | eMol206965358      | -7.0                     | -7.0         | 981  | eMol27202380       | -7.1                     | -6.5         |
| 947: | eMol25901881       | -7.0                     | -7.0         | 982  | eMol33346435       | -7.2                     | -6.5         |
| 948: | eMol26299531       | -7.0                     | -7.0         | 983  | CHEMBL82690        | -7.4                     | -6.3         |
| 949: | eMol26324447       | -7.0                     | -7.0         | 984  | eMol11690694       | -7.5                     | -6.3         |
| 950: | eMol27202422       | -7.1                     | -7.0         | 985  | eMol1764376        | -7.6                     | -6.2         |
| 951: | eMol3775722        | -7.0                     | -7.0         | 986  | eMol2992482        | -8.1                     | -6.2         |
| 952: | CHEMBL1900041      | -7.0                     | -7.0         | 987  | eMol2194316        | -7.1                     | -6.1         |
| 953: | CHEMBL3804880      | -7.0                     | -7.0         | 988  | eMol16375743       | -7.1                     | -6.1         |
| 954: | eMol181109768      | -7.2                     | -7.0         | 989  | eMol36016132       | -7.1                     | -6.0         |
| 955: | eMol20356657       | -7.0                     | -7.0         | 990  | eMol16351883       | -7.1                     | -5.8         |
| 956: | CHEMBL2297667      | -7.0                     | -7.0         | 991  | eMol179165005      | -7.3                     | -5.8         |
| 957: | eMol4388132        | -7.4                     | -7.0         | 992  | eMol587916         | -7.1                     | -5.7         |
| 958: | eMol27202320       | -7.0                     | -7.0         | 993  | eMol43745829       | -7.3                     | -5.7         |
| 959: | eMol25903659       | -7.1                     | -7.0         | 994  | eMol2992488        | -7.6                     | -5.6         |
| 960: | eMol44548966       | -7.2                     | -7.0         | 995  | eMol24493983       | -7.4                     | -5.5         |
| 961: | eMol565918         | -7.2                     | -6.9         | 996  | eMol24427880       | -7.4                     | -5.4         |
| 962: | eMol206909136      | -7.1                     | -6.9         | 997  | eMol5444883        | -7.1                     | -5.3         |
| 963: | eMol581304         | -7.3                     | -6.9         | 998  | eMol31358919       | -7.3                     | -5.3         |
| 964: | eMol46411087       | -7.4                     | -6.9         | 999  | eMol3181655        | -7.1                     | -5.1         |
| 965: | CHEMBL1591720      | -7.1                     | -6.9         | 1000 | CHEMBL1214720      | -8.8                     | -5.1         |
| 966: | eMol27202778       | -7.1                     | -6.9         |      |                    |                          |              |

<sup>a</sup> Data ranked based on the intermediate docking scores.

**Table S3.** Estimated conventional, intermediate, and Expensive docking scores for QNZ and the top 250 potent allosteric inhibitors against mutated PBP2a allosteric site in acidic medium.<sup>a</sup>

| No. | Compound Name/Code | Docking Score (kcal/mol) |              |           | No. | Compound Name/Code | Docking Score (kcal/mol) |              |           |
|-----|--------------------|--------------------------|--------------|-----------|-----|--------------------|--------------------------|--------------|-----------|
|     |                    | Conventional             | Intermediate | Expensive |     |                    | Conventional             | Intermediate | Expensive |
|     | QNZ                | -6.9                     | -8.0         | -8.3      | 63  | eMol30323633       | -9.0                     | -9.1         | -8.2      |
| 1   | eMol26313223       | -8.3                     | -8.4         | -10.0     | 64  | CHEMBL1214938      | -8.7                     | -9.0         | -8.2      |
| 2   | eMol26437582       | -8.2                     | -8.9         | -9.9      | 65  | eMol20375178       | -8.7                     | -9.0         | -8.2      |
| 3   | eMol26314565       | -8.2                     | -8.2         | -9.6      | 66  | eMol30323569       | -8.6                     | -9.0         | -8.2      |
| 4   | eMol26313117       | -8.9                     | -9.4         | -9.5      | 67  | eMol30341049       | -8.8                     | -8.9         | -8.2      |
| 5   | eMol26293960       | -8.1                     | -9.2         | -9.4      | 68  | eMol43906045       | -8.8                     | -8.9         | -8.2      |
| 6   | eMol3021959        | -7.1                     | -8.9         | -9.4      | 69  | CHEMBL3818584      | -8.3                     | -8.9         | -8.2      |
| 7   | eMol29597031       | -9.2                     | -9.3         | -9.3      | 70  | eMol20378769       | -8.7                     | -8.9         | -8.2      |
| 8   | eMol26269394       | -8.5                     | -8.7         | -9.1      | 71  | eMol20342262       | -7.9                     | -8.8         | -8.2      |
| 9   | eMol27202760       | -8.0                     | -8.1         | -9.1      | 72  | eMol19076712       | -8.9                     | -8.9         | -8.2      |
| 10  | eMol26242018       | -8.0                     | -8.8         | -9.0      | 73  | eMol18542846       | -8.8                     | -8.8         | -8.2      |
| 11  | eMol29633913       | -7.8                     | -8.6         | -8.9      | 74  | CHEMBL1214941      | -8.6                     | -8.1         | -8.1      |
| 12  | CHEMBL1215080      | -8.4                     | -8.4         | -8.9      | 75  | eMol1166007        | -8.7                     | -8.8         | -8.1      |
| 13  | eMol27252412       | -8.1                     | -8.2         | -8.7      | 76  | CHEMBL3805841      | -7.7                     | -8.0         | -8.1      |
| 14  | eMol30017880       | -7.4                     | -8.3         | -8.7      | 77  | eMol20337486       | -8.8                     | -8.8         | -8.1      |
| 15  | eMol26319231       | -8.2                     | -8.6         | -8.7      | 78  | eMol23190351       | -7.9                     | -8.7         | -8.1      |
| 16  | eMol26264570       | -8.1                     | -8.4         | -8.7      | 79  | eMol19076754       | -8.6                     | -8.8         | -8.1      |
| 17  | eMol300094331      | -8.2                     | -8.3         | -8.7      | 80  | eMol31781482       | -8.7                     | -8.6         | -8.1      |
| 18  | eMol29565259       | -7.8                     | -8.2         | -8.6      | 81  | CHEMBL1215649      | -8.5                     | -8.6         | -8.1      |
| 19  | eMol27406062       | -7.8                     | -8.3         | -8.6      | 82  | eMol26196316       | -8.5                     | -8.6         | -8.1      |
| 20  | eMol299980544      | -8.2                     | -8.2         | -8.6      | 83  | eMol33366267       | -7.9                     | -8.6         | -8.1      |
| 21  | eMol27202252       | -8.0                     | -8.1         | -8.6      | 84  | eMol75958504       | -7.9                     | -8.6         | -8.1      |
| 22  | eMol29634797       | -7.6                     | -8.1         | -8.6      | 85  | CHEMBL1215648      | -8.6                     | -8.7         | -8.1      |
| 23  | eMol27202248       | -8.4                     | -8.3         | -8.6      | 86  | eMol20379909       | -8.8                     | -8.8         | -8.1      |
| 24  | CHEMBL1215082      | -7.4                     | -8.0         | -8.5      | 87  | eMol26196326       | -8.6                     | -8.7         | -8.1      |
| 25  | eMol26242042       | -7.6                     | -8.5         | -8.5      | 88  | eMol45585842       | -8.6                     | -8.7         | -8.1      |
| 26  | eMol300154219      | -7.3                     | -8.3         | -8.5      | 89  | eMol23241028       | -8.6                     | -8.7         | -8.1      |
| 27  | eMol26242026       | -7.8                     | -8.2         | -8.4      | 90  | eMol45622743       | -7.8                     | -8.6         | -8.1      |
| 28  | eMol26330545       | -8.2                     | -8.2         | -8.4      | 91  | CHEMBL1215650      | -8.5                     | -8.7         | -8.1      |
| 29  | eMol27091674       | -8.0                     | -8.1         | -8.4      | 92  | CHEMBL1579061      | -8.5                     | -8.7         | -8.1      |
| 30  | CHEMBL1215004      | -7.7                     | -8.2         | -8.4      | 93  | eMol30646140       | -7.7                     | -8.6         | -8.1      |
| 31  | eMol27091498       | -8.0                     | -8.1         | -8.4      | 94  | eMol72993476       | -7.7                     | -8.6         | -8.1      |
| 32  | eMol29587306       | -7.7                     | -8.2         | -8.4      | 95  | eMol22447774       | -8.5                     | -8.7         | -8.1      |
| 33  | eMol26314779       | -8.1                     | -8.2         | -8.3      | 96  | eMol30248263       | -8.0                     | -8.4         | -8.0      |
| 34  | eMol27202948       | -7.4                     | -8.0         | -8.3      | 97  | eMol19076742       | -8.6                     | -8.7         | -8.0      |
| 35  | eMol301527162      | -8.0                     | -8.1         | -8.3      | 98  | eMol23157132       | -8.4                     | -8.6         | -8.0      |
| 36  | eMol19266609       | -7.9                     | -9.5         | -8.2      | 99  | eMol26242050       | -8.1                     | -8.6         | -8.0      |
| 37  | eMol24519694       | -9.0                     | -9.5         | -8.2      | 100 | CHEMBL1214713      | -8.2                     | -8.6         | -8.0      |
| 38  | CHEMBL1443074      | -8.0                     | -8.1         | -8.2      | 101 | CHEMBL1384683      | -8.2                     | -8.6         | -8.0      |
| 39  | eMol18940433       | -8.0                     | -8.1         | -8.2      | 102 | CHEMBL1558437      | -8.2                     | -8.6         | -8.0      |
| 40  | CHEMBL1214717      | -9.4                     | -9.4         | -8.2      | 103 | CHEMBL3818129      | -8.5                     | -8.6         | -8.0      |
| 41  | eMol29587310       | -9.4                     | -9.4         | -8.2      | 104 | eMol26270654       | -8.2                     | -8.6         | -8.0      |
| 42  | eMol45585846       | -9.4                     | -9.4         | -8.2      | 105 | eMol300994534      | -8.4                     | -8.6         | -8.0      |
| 43  | eMol24389393       | -7.9                     | -9.4         | -8.2      | 106 | eMol48938145       | -8.4                     | -8.6         | -8.0      |
| 44  | eMol23239806       | -9.3                     | -9.4         | -8.2      | 107 | eMol30671942       | -7.9                     | -8.5         | -8.0      |
| 45  | CHEMBL1214718      | -9.2                     | -9.3         | -8.2      | 108 | eMol23246696       | -8.5                     | -8.6         | -8.0      |
| 46  | eMol45585848       | -9.2                     | -9.3         | -8.2      | 109 | eMol26242044       | -8.3                     | -8.4         | -8.0      |
| 47  | eMol31786896       | -8.4                     | -9.3         | -8.2      | 110 | eMol36912832       | -7.9                     | -8.4         | -8.0      |
| 48  | eMol2403964        | -8.7                     | -9.3         | -8.2      | 111 | eMol26242034       | -8.2                     | -8.5         | -7.9      |
| 49  | eMol23186178       | -9.1                     | -9.3         | -8.2      | 112 | CHEMBL3805924      | -8.3                     | -8.5         | -7.9      |
| 50  | eMol31297102       | -7.9                     | -9.2         | -8.2      | 113 | eMol23175530       | -8.3                     | -8.5         | -7.9      |
| 51  | eMol19076714       | -8.4                     | -9.2         | -8.2      | 114 | eMol24519844       | -8.4                     | -8.5         | -7.9      |
| 52  | eMol19076718       | -8.9                     | -9.1         | -8.2      | 115 | CHEMBL3582080      | -7.9                     | -8.1         | -7.9      |
| 53  | eMol18542844       | -9.1                     | -9.1         | -8.2      | 116 | eMol1344114        | -9.0                     | -9.1         | -7.9      |
| 54  | CHEMBL1214794      | -8.9                     | -9.0         | -8.2      | 117 | eMol26242032       | -7.9                     | -8.3         | -7.9      |
| 55  | eMol25810077       | -7.9                     | -8.4         | -8.2      | 118 | eMol43906059       | -8.4                     | -8.4         | -7.9      |
| 56  | eMol26196290       | -8.9                     | -9.0         | -8.2      | 119 | eMol23243407       | -8.2                     | -8.4         | -7.9      |
| 57  | eMol45585824       | -8.9                     | -9.0         | -8.2      | 120 | eMol43906055       | -8.0                     | -8.4         | -7.9      |
| 58  | CHEMBL3819187      | -7.8                     | -9.1         | -8.2      | 121 | eMol579568         | -8.4                     | -8.4         | -7.8      |
| 59  | CHEMBL3818732      | -8.0                     | -9.0         | -8.2      | 122 | eMol23239141       | -8.3                     | -8.4         | -7.8      |
| 60  | eMol26262168       | -7.0                     | -8.0         | -8.2      | 123 | eMol588192         | -8.2                     | -8.4         | -7.8      |
| 61  | eMol29638777       | -7.8                     | -8.1         | -8.2      | 124 | CHEMBL4103504      | -8.3                     | -8.5         | -7.8      |
| 62  | eMol46480173       | -8.2                     | -8.3         | -8.2      | 125 | eMol23181799       | -8.3                     | -8.4         | -7.8      |

Table S3. *Continued.*

| No. | Compound Name/Code | Docking Score (kcal/mol) |              |           | No. | Compound Name/Code | Docking Score (kcal/mol) |              |           |
|-----|--------------------|--------------------------|--------------|-----------|-----|--------------------|--------------------------|--------------|-----------|
|     |                    | Conventional             | Intermediate | Expensive |     |                    | Conventional             | Intermediate | Expensive |
| 126 | eMol587826         | -8.2                     | -8.4         | -7.8      | 189 | eMol4566508        | -7.3                     | -8.2         | -7.6      |
| 127 | eMol679826         | -8.3                     | -8.4         | -7.8      | 190 | eMol20368046       | -8.1                     | -8.2         | -7.6      |
| 128 | eMol27202910       | -8.3                     | -8.4         | -7.8      | 191 | eMol23147497       | -8.1                     | -8.2         | -7.6      |
| 129 | CHEMBL3818572      | -8.0                     | -8.3         | -7.8      | 192 | eMol679824         | -8.0                     | -8.2         | -7.6      |
| 130 | eMol18962382       | -8.4                     | -8.4         | -7.8      | 193 | eMol24428240       | -7.2                     | -8.5         | -7.6      |
| 131 | eMol27202240       | -8.4                     | -8.4         | -7.8      | 194 | eMol37002179       | -7.4                     | -8.1         | -7.6      |
| 132 | eMol679820         | -7.2                     | -8.4         | -7.8      | 195 | eMol45585838       | -7.8                     | -8.2         | -7.6      |
| 133 | eMol31532412       | -8.3                     | -8.4         | -7.8      | 196 | CHEMBL1601398      | -8.0                     | -8.1         | -7.6      |
| 134 | CHEMBL1215003      | -8.2                     | -8.3         | -7.8      | 197 | eMol2507718        | -8.0                     | -8.1         | -7.6      |
| 135 | eMol25810075       | -8.3                     | -8.4         | -7.8      | 198 | eMol26242024       | -7.7                     | -8.2         | -7.6      |
| 136 | eMol2992792        | -8.1                     | -8.3         | -7.8      | 199 | eMol4558540        | -8.0                     | -8.2         | -7.6      |
| 137 | eMol43731476       | -7.6                     | -8.3         | -7.8      | 200 | eMol256911679      | -8.0                     | -8.1         | -7.6      |
| 138 | eMol43906053       | -8.2                     | -8.3         | -7.8      | 201 | eMol4562556        | -8.1                     | -8.1         | -7.6      |
| 139 | CHEMBL395193       | -8.3                     | -8.3         | -7.8      | 202 | eMol45935562       | -7.5                     | -8.1         | -7.6      |
| 140 | eMol193446288      | -8.3                     | -8.3         | -7.8      | 203 | eMol565850         | -7.0                     | -8.1         | -7.6      |
| 141 | eMol26242022       | -7.9                     | -8.3         | -7.8      | 204 | eMol579756         | -8.0                     | -8.1         | -7.6      |
| 142 | CHEMBL3817888      | -8.1                     | -8.3         | -7.7      | 205 | eMol20361212       | -8.1                     | -8.1         | -7.5      |
| 143 | eMol18542848       | -8.3                     | -8.3         | -7.7      | 206 | eMol4446697        | -7.7                     | -8.1         | -7.5      |
| 144 | eMol20347873       | -8.2                     | -8.3         | -7.7      | 207 | eMol25784531       | -7.1                     | -8.1         | -7.5      |
| 145 | eMol206926236      | -8.2                     | -8.3         | -7.7      | 208 | eMol27202348       | -8.1                     | -8.1         | -7.5      |
| 146 | eMol45622749       | -7.8                     | -8.1         | -7.7      | 209 | eMol4518648        | -8.1                     | -8.1         | -7.5      |
| 147 | eMol25810071       | -8.3                     | -8.3         | -7.7      | 210 | eMol177199339      | -7.9                     | -8.1         | -7.5      |
| 148 | eMol6263471        | -8.2                     | -8.3         | -7.7      | 211 | eMol300994251      | -7.9                     | -8.1         | -7.5      |
| 149 | CHEMBL1214647      | -8.1                     | -8.4         | -7.7      | 212 | eMol45585836       | -7.7                     | -8.2         | -7.5      |
| 150 | eMol19076598       | -7.3                     | -8.3         | -7.7      | 213 | eMol4577396        | -8.0                     | -8.1         | -7.5      |
| 151 | eMol25810083       | -8.3                     | -8.3         | -7.7      | 214 | eMol48768479       | -7.9                     | -8.1         | -7.5      |
| 152 | eMol46490873       | -8.1                     | -8.2         | -7.7      | 215 | eMol4566756        | -7.9                     | -8.1         | -7.5      |
| 153 | eMol46365626       | -8.2                     | -8.3         | -7.7      | 216 | eMol20378767       | -7.9                     | -8.1         | -7.5      |
| 154 | eMol566574         | -8.1                     | -8.3         | -7.7      | 217 | eMol580072         | -8.0                     | -8.1         | -7.5      |
| 155 | CHEMBL3818929      | -8.2                     | -8.3         | -7.7      | 218 | eMol179164947      | -7.8                     | -8.0         | -7.5      |
| 156 | CHEMBL518358       | -8.2                     | -8.3         | -7.7      | 219 | eMol46367311       | -7.8                     | -8.0         | -7.5      |
| 157 | eMol13856171       | -8.0                     | -8.2         | -7.7      | 220 | eMol565798         | -8.1                     | -8.1         | -7.5      |
| 158 | eMol26809774       | -8.2                     | -8.2         | -7.7      | 221 | eMol27091442       | -7.9                     | -8.1         | -7.5      |
| 159 | CHEMBL1214935      | -8.1                     | -8.3         | -7.7      | 222 | eMol27202916       | -7.2                     | -8.1         | -7.5      |
| 160 | eMol26242038       | -7.9                     | -8.2         | -7.7      | 223 | eMol4397966        | -8.0                     | -8.1         | -7.5      |
| 161 | eMol26314331       | -7.5                     | -8.3         | -7.7      | 224 | eMol679550         | -7.9                     | -8.1         | -7.5      |
| 162 | eMol43906051       | -8.1                     | -8.3         | -7.7      | 225 | CHEMBL1214934      | -7.0                     | -8.0         | -7.5      |
| 163 | CHEMBL1214936      | -8.2                     | -8.3         | -7.7      | 226 | eMol25966646       | -7.9                     | -8.0         | -7.5      |
| 164 | eMol26196312       | -8.2                     | -8.3         | -7.7      | 227 | eMol27202242       | -8.0                     | -8.0         | -7.5      |
| 165 | eMol27202258       | -8.3                     | -8.2         | -7.7      | 228 | eMol28321864       | -8.0                     | -8.0         | -7.4      |
| 166 | eMol45585832       | -8.2                     | -8.3         | -7.7      | 229 | eMol4549830        | -7.3                     | -8.0         | -7.4      |
| 167 | eMol681936         | -8.2                     | -8.2         | -7.7      | 230 | eMol1035521        | -7.9                     | -8.0         | -7.4      |
| 168 | eMol25819217       | -8.3                     | -8.2         | -7.6      | 231 | eMol206992517      | -8.0                     | -8.0         | -7.4      |
| 169 | eMol26320021       | -7.4                     | -8.2         | -7.6      | 232 | eMol579718         | -8.0                     | -8.1         | -7.4      |
| 170 | eMol30323345       | -9.8                     | -8.2         | -7.6      | 233 | eMol581308         | -7.9                     | -8.0         | -7.4      |
| 171 | eMol43731530       | -7.3                     | -8.2         | -7.6      | 234 | CHEMBL485839       | -8.0                     | -8.0         | -7.4      |
| 172 | eMol46480165       | -8.2                     | -8.2         | -7.6      | 235 | eMol43906047       | -7.9                     | -8.0         | -7.4      |
| 173 | eMol1088331        | -8.2                     | -8.2         | -7.6      | 236 | eMol43906057       | -7.4                     | -8.0         | -7.4      |
| 174 | eMol1755402        | -8.0                     | -8.2         | -7.6      | 237 | eMol681814         | -7.9                     | -8.0         | -7.4      |
| 175 | eMol23178762       | -8.1                     | -8.2         | -7.6      | 238 | CHEMBL2259943      | -7.9                     | -8.0         | -7.4      |
| 176 | CHEMBL3819481      | -7.9                     | -8.2         | -7.6      | 239 | eMol36912834       | -8.0                     | -8.1         | -7.4      |
| 177 | CHEMBL1215578      | -8.0                     | -8.2         | -7.6      | 240 | eMol26242052       | -7.3                     | -8.2         | -7.4      |
| 178 | CHEMBL1215797      | -8.0                     | -8.2         | -7.6      | 241 | eMol18551342       | -8.0                     | -8.0         | -7.4      |
| 179 | CHEMBL508966       | -8.1                     | -8.2         | -7.6      | 242 | eMol4578697        | -7.3                     | -8.1         | -7.4      |
| 180 | eMol20377597       | -8.0                     | -8.2         | -7.6      | 243 | eMol4552519        | -8.0                     | -8.1         | -7.4      |
| 181 | eMol24530483       | -8.2                     | -8.2         | -7.6      | 244 | CHEMBL3818035      | -7.9                     | -8.4         | -7.4      |
| 182 | eMol29653471       | -8.2                     | -8.2         | -7.6      | 245 | eMol679822         | -8.0                     | -8.2         | -7.4      |
| 183 | eMol45622745       | -8.2                     | -8.2         | -7.6      | 246 | CHEMBL1214648      | -8.0                     | -8.2         | -7.4      |
| 184 | eMol48982653       | -7.7                     | -8.2         | -7.6      | 247 | CHEMBL3582082      | -7.3                     | -8.1         | -7.4      |
| 185 | eMol566488         | -8.1                     | -8.2         | -7.6      | 248 | CHEMBL3818775      | -8.2                     | -8.2         | -7.4      |
| 186 | eMol679556         | -8.0                     | -8.2         | -7.6      | 249 | eMol11920256       | -8.1                     | -8.2         | -7.4      |
| 187 | eMol956623         | -8.2                     | -8.2         | -7.6      | 250 | CHEMBL1534883      | -9.0                     | -9.1         | -7.4      |
| 188 | eMol18550846       | -8.1                     | -8.2         | -7.6      |     |                    |                          |              |           |

<sup>a</sup>Data ranked based on the Expensive docking score.

**Table S4.** Estimated conventional, intermediate, and expensive docking scores, MM-GBSA//MM binding energies and binding features of AMBER-based minimized structures for QNZ and the top 35 potent inhibitors against mutated PBP2a allosteric site in acidic medium.<sup>a</sup>

| No. | Compound Name/Code | Docking score (kcal/mol) |              |           | MM-GBSA//MM binding energy (kcal/mol) | Binding Features <sup>b</sup>                                                                   |
|-----|--------------------|--------------------------|--------------|-----------|---------------------------------------|-------------------------------------------------------------------------------------------------|
|     |                    | Conventional             | Intermediate | Expensive |                                       |                                                                                                 |
| 1   | QNZ                | -6.9                     | -8.0         | -8.3      | -31.4                                 | VAL277 (2.28 Å),<br>GLU294 (1.57 Å),<br>LYS316 (2.60, 2.72 Å)                                   |
| 2   | eMol26313223       | -8.3                     | -8.4         | -10.0     | -39.6                                 | LYS146 (1.89 Å),<br>LYS273 (1.94, 2.21 Å), LYS316 (2.19 Å)                                      |
| 3   | eMol26314565       | -8.2                     | -8.2         | -9.6      | -39.1                                 | LYS146 (1.97 Å),<br>LYS273 (2.03 Å),<br>LYS316 (3.08 Å)                                         |
| 4   | eMol26437582       | -8.2                     | -8.9         | -9.9      | -38.2                                 | GLU294 (1.59 Å),<br>LYS316 (1.82 Å),<br>LYS146 (2.14 Å)                                         |
| 5   | eMol29634797       | -7.6                     | -8.1         | -8.6      | -37.1                                 | LYS273 (1.77, 2.46 Å), ASP295 (1.61 Å),<br>LYS316 (1.92 Å)                                      |
| 6   | eMol29597031       | -9.2                     | -9.3         | -9.3      | -35.2                                 | LYS146 (2.21 Å),<br>VAL277 (1.98 Å),<br>GLU294 (1.62 Å),<br>LYS316 (1.80 Å)                     |
| 7   | eMol29633913       | -7.8                     | -8.6         | -8.9      | -34.2                                 | GLU294 (1.67 Å),<br>LYS316 (1.83 Å)                                                             |
| 8   | eMol26314779       | -8.1                     | -8.2         | -8.3      | -34.2                                 | LYS146 (2.10 Å),<br>LYS273 (1.90 Å),<br>LYS316 (2.85 Å)                                         |
| 9   | eMol26269394       | -8.5                     | -8.7         | -9.1      | -31.6                                 | LYS146 (2.01 Å),<br>LYS273 (2.02 Å),<br>GLU294 (1.57 Å),<br>LYS316 (1.79 Å)                     |
| 10  | eMol27252412       | -8.1                     | -8.2         | -8.7      | -29.8                                 | LYS316 (2.24 Å)                                                                                 |
| 11  | eMol300094331      | -8.2                     | -8.3         | -8.7      | -29.6                                 | GLU294 (1.60 Å),<br>LYS316 (1.99 Å)                                                             |
| 12  | eMol30017880       | -7.4                     | -8.3         | -8.7      | -29.3                                 | TYR105 (2.04 Å),<br>LYS146 (2.16 Å),<br>GLU294 (1.58 Å),<br>LYS316 (1.86 Å)                     |
| 13  | eMol26242018       | -8.0                     | -8.8         | -9.0      | -29.1                                 | LYS146 (2.16 Å),<br>GLU294 (1.58 Å),<br>LYS316 (1.86 Å)                                         |
| 14  | eMol27091498       | -8.0                     | -8.1         | -8.4      | -29.1                                 | LYS273 (1.92 Å),<br>ASP295 (1.97 Å),<br>LYS316 (1.99 Å)                                         |
| 15  | eMol26313117       | -8.9                     | -9.4         | -9.5      | -29.0                                 | LYS146 (2.21 Å),<br>ASP295 (2.01 Å),<br>LYS316 (1.90 Å)                                         |
| 16  | eMol27406062       | -7.8                     | -8.3         | -8.6      | -28.6                                 | LYS146 (2.07 Å),<br>LYS273 (1.99 Å),<br>GLU294 (1.60 Å),<br>ASP295 (2.60 Å),<br>LYS316 (1.85 Å) |
| 17  | eMol27091674       | -8.0                     | -8.1         | -8.4      | -28.4                                 | LYS273 (1.92 Å),<br>ASP295 (1.99 Å),<br>LYS316 (1.97 Å)                                         |



Table S4. Continued.

| No. | Compound Name/Code | Docking score (kcal/mol) |              |           | MM-GBSA/MM binding energy (kcal/mol) | Binding Features <sup>b</sup>                                                                   |
|-----|--------------------|--------------------------|--------------|-----------|--------------------------------------|-------------------------------------------------------------------------------------------------|
|     |                    | Conventional             | Intermediate | Expensive |                                      |                                                                                                 |
| 18  | eMol26242042       | -7.6                     | -8.5         | -8.5      | -28.2                                | LYS146 (2.22 Å),<br>LYS273 (2.01 Å),<br>ASP295 (2.13 Å),<br>LYS316 (1.86 Å)                     |
| 19  | eMol26242026       | -7.8                     | -8.2         | -8.4      | -27.9                                | LYS146 (2.21 Å),<br>LYS273 (1.99 Å),<br>ASP295 (2.09 Å),<br>LYS316 (1.86 Å)                     |
| 20  | eMol301527162      | -8.0                     | -8.1         | -8.3      | -27.8                                | LYS273 (1.89 Å),<br>ASP295 (1.92, 2.83 Å),<br>LYS316 (2.36, 3.02, 3.04, 3.07 Å)                 |
| 21  | eMol26293960       | -8.1                     | -9.2         | -9.4      | -27.4                                | LYS146 (2.31 Å),<br>ASP295 (2.12 Å),<br>LYS316 (1.90 Å)                                         |
| 22  | eMol3021959        | -7.1                     | -8.9         | -9.4      | -27.1                                | LYS316 (1.86 Å)                                                                                 |
| 23  | CHEMBL1215004      | -7.7                     | -8.2         | -8.4      | -26.7                                | LYS146 (2.24 Å),<br>HIS293 (2.89 Å),<br>GLU294 (1.62 Å),<br>ASP295 (2.04 Å),<br>LYS316 (1.80 Å) |
| 24  | CHEMBL1215080      | -8.4                     | -8.4         | -8.9      | -26.4                                | LYS146 (1.99 Å),<br>LYS273 (2.01 Å),<br>GLU294 (1.56 Å),<br>LYS316 (1.80 Å)                     |
| 25  | eMol26262168       | -7.0                     | -8.0         | -8.5      | -26.3                                | LYS146 (2.22 Å),<br>GLU294 (1.61 Å),<br>LYS316 (1.80 Å)                                         |
| 26  | CHEMBL1215082      | -7.4                     | -8.0         | -8.5      | -25.5                                | LYS146 (1.97 Å),<br>LYS273 (2.17 Å),<br>GLU294 (1.56 Å),<br>LYS316 (1.81 Å)                     |
| 27  | eMol29565259       | -7.8                     | -8.2         | -8.6      | -25.1                                | LYS146 (1.98 Å),<br>LYS273 (1.95, 2.96 Å),<br>GLU294 (1.57 Å),<br>LYS316 (1.81 Å)               |
| 28  | eMol26330545       | -8.2                     | -8.2         | -8.4      | -25.1                                | LYS273 (2.06 Å),<br>LYS316 (1.98 Å)                                                             |
| 29  | eMol27202248       | -8.4                     | -8.3         | -8.6      | -24.5                                | LYS273 (2.15 Å),<br>LYS316 (2.01 Å)                                                             |
| 30  | eMol27202760       | -8.0                     | -8.1         | -9.1      | -24.5                                | LYS273 (1.94 Å),<br>LYS316 (1.92 Å)                                                             |
| 31  | eMol26264570       | -8.1                     | -8.4         | -8.7      | -24.3                                | LYS273 (2.00, 2.02 Å),<br>GLU294 (1.62 Å),<br>LYS316 (1.83 Å)                                   |
| 32  | eMol27202948       | -7.4                     | -8.0         | -8.3      | -24.0                                | LYS273 (2.30 Å),<br>ASP295 (2.18 Å),<br>LYS316 (2.59 Å)                                         |
| 33  | eMol27202252       | -8.0                     | -8.1         | -8.6      | -23.3                                | LYS316 (1.89 Å)                                                                                 |
| 34  | eMol299980544      | -8.2                     | -8.2         | -8.6      | -23.2                                | LYS316 (1.96 Å)                                                                                 |
| 35  | eMol26319231       | -8.2                     | -8.6         | -8.7      | -22.9                                | LYS273 (2.01 Å),<br>LYS316 (1.95 Å)                                                             |
| 36  | eMol300154219      | -7.3                     | -8.3         | -8.5      | -21.0                                | LYS273 (1.92, 2.45 Å),<br>ASP295 (2.21 Å),<br>LYS316 (2.51 Å)                                   |

<sup>a</sup>Data ranked based on the MM-GBSA/MM binding energy. <sup>b</sup>Only hydrogen bonds (in Å) were displayed.
